# Supplementary material
Source: PubMed Central journal article supplement (PMC3737601)
Supplement: es401380p_si_001.pdf [file es401380p_si_001.pdf]

## Supporting Information

### **Global transcriptome profiling reveals molecular mechanisms of metal tolerance in a chronically exposed wild population of brown trout.**

T. M. Uren Webster<sup>1\*</sup>, N. Bury<sup>2</sup>, R. van Aerle<sup>1</sup> and E. M. Santos<sup>1\*</sup>

1. Biosciences, College of Life & Environmental Sciences, Geoffrey Pope Building, University of Exeter, Exeter, EX4 4QD

2. Diabetes & Nutritional Sciences Division, 3.83 Franklin-Wilkins Building, King's College London, London, SE1 9NH

\* Corresponding authors

This Supporting Information contains:

Page S2: Supplemental Experimental Section

Page S5: References

Page S6: Metal concentrations in the river Hayle and river Teign, **Table S1**

Page S7: Description of cDNA libraries sequenced, **Table S2**

Page S8: Fold changes between the Hayle and Teign fish of potential control genes for RT-QPCR analysis, **Table S3a**

Page S8: Target genes, primers and assay details for RT-QPCR analysis, **Table S3b**

Page S9: Cluster diagrams of tissue metal concentration, **Figure S1**

Page S10: Summary statistics of sequence read processing and QC filtering, **Table S4**

Page S11: Transcript abundance level in each tissue, **Table S5**

Page S12: Results of RT-QPCR analysis, **Table S6**

Page S13: Heatmaps of expression values of differentially expressed genes, **Figure S2**

Page S14: Gene Ontology Terms over-represented in the lists of differentially expressed genes between Hayle and Teign fish for each tissue, **Table S7**

Page S17: List of differentially expressed genes between Hayle and Teign fish, **Table S8**

## Supplemental Experimental Section

### *Sample collection*

Eggs and sperm were stripped from five female and two male brown trout obtained from a trout farm and mixed to facilitate fertilisation. Fertilised eggs were incubated at  $8\pm 1$  °C on gravel beds in flow-through de-chlorinated tap water. Embryos were collected at 10 developmental stages identified according to [16], as follows: unfertilised eggs (0 days post fertilisation (dpf)), blastula (2 dpf), gastrula (6 dpf), early somitogenesis (10 dpf), late somitogenesis (14 dpf), early organogenesis (21 dpf), mid organogenesis (31 dpf), late organogenesis (41 dpf), hatched alevins (51 dpf) and swim-up fry just prior to commencement of feeding (70 dpf). All embryos were snap frozen in liquid nitrogen then stored at -80 °C prior to RNA extraction.

For collection of adult tissues, five brown trout from the River Hayle at Relubbus in Cornwall (N 50° 8.476774' , W 5° 24.661446') and 10 brown trout from the control site, the relatively un-impacted River Teign at Gidleigh Park in Devon (N 50° 40.568816' , W 3° 52.407188') were caught by electric fishing on the 19<sup>th</sup> September 2010 and 11<sup>th</sup> October 2010 respectively. The fish were humanely killed with a lethal dose of benzocaine (0.5 g L<sup>-1</sup>; Sigma-Aldrich) and individual tissues (gill, liver, heart, spleen, stomach, intestine, gonad, head kidney, trunk kidney, eye, brain, pituitary, muscle, skin and caudal fin) were dissected and transported on dry ice to the University of Exeter where they were stored at -80 °C prior to RNA extraction or analysis of metal content.

### *RNA extraction, cDNA Library preparation and sequencing*

Total RNA was extracted from all individual wild fish tissues and from individual embryos using TRI reagent (Sigma-Aldrich) according to the manufacturer's instructions. The isopropanol precipitation step was modified by addition of a high salt solution (0.8 M sodium citrate, 1.2 M NaCl) to remove proteoglycon and polysaccharide contamination [1] during the embryo extractions. The concentration and purity of the resulting RNA was assessed using absorbance measurements at 260 nm and by monitoring the 230/260 and 260/280 nm absorbance ratios, using a NanoDrop ND-1000 Spectrophotometer (NanoDrop Technologies, Wilmington, USA). The integrity of the RNA was further assessed by gel electrophoresis (1% agarose). Equal amounts of total RNA from five embryos were pooled for each developmental stage, before these were combined into a single embryonic sample for sequencing. For the adult fish, equal amounts of total RNA from individual fish tissues were pooled into 12 samples for sequencing to form the following pools: gill, trunk kidney, liver and gut (consisting of stomach and intestine) from both Hayle and Teign fish; ovary and testis from Teign fish (from mature and maturing fish only); and mixed remaining tissues from the Hayle and from the Teign trout (Table S2). This strategy was adopted to allow for comparisons of transcript abundance between the Hayle and Teign fish for tissues hypothesised to be involved in metal tolerance (gill, gut, kidney and liver), and to maximise the likelihood of sequencing genes specific for each tissue. All RNA samples were treated with DNase and cleaned up on Qiagen RNeasy MinElute columns, then quality and concentration were determined using an Agilent 2100 Bioanalyzer (Agilent Technologies, Inc., USA). All RNA input to library construction was of high quality with a RIN > 8. cDNA libraries were prepared from each

RNA sample using the Illumina TruSeq RNA Sample Preparation kit, and according to the manufacturer's instructions. The single embryonic cDNA library was sequenced in one lane of the Illumina GAllx Genome Analyzer generating 100 bp paired-end reads. All cDNA libraries constructed from the wild fish were multiplexed 12x and sequenced in another single lane, generating 76 bp paired-end reads. The average insert size of the multiplexed libraries was 153 bp, and of the embryonic library was 142 bp.

### *Bioinformatics*

The FASTX-Toolkit ([http://hannonlab.cshl.edu/fastx\\_toolkit](http://hannonlab.cshl.edu/fastx_toolkit)) was used to clip remaining Illumina adapter sequences from the sequence reads and to trim the first 12 bp at the 5' end to remove bias caused by random hexamer priming [2]. Quality trimming of the 3' end of the reads using a sliding window at the first base with a quality Phred score of < 20 was performed (<http://wiki.bioinformatics.ucdavis.edu/index.php/Trim.slidingWindow.pl>) and reads shorter than 30 bp were discarded from the dataset. Paired reads were separated from orphan reads for each of the adult tissue and embryonic libraries, using the script from [https://github.com/lexnederbragt/denovo-assembly-tutorial/blob/master/scripts/pair\\_up\\_reads.py](https://github.com/lexnederbragt/denovo-assembly-tutorial/blob/master/scripts/pair_up_reads.py). All 'forward' reads (read 1) and 'reverse' reads (read 2) of the adult tissue libraries were pooled into 2 separate fastq files and interleaved using the shuffleSequences\_fastq.pl script provided by the Velvet package in preparation for assembly. Similarly, interleaved fastq files were created for the embryonic tissue library.

The interleaved paired and orphan sequences for adult tissues and embryos were assembled *de novo* using Velvet (version 1.2.08; [3]) and Oases (version 0.2.08; [4]). An initial assembly was created using a k-mer of 73 and using the following parameters for Oases: ins\_length 50 - ins\_length\_sd 200. Subsequently, assemblies were created using k-mers ranging from 65 to 41 (with steps of 8), such that the transcripts generated by the previous assembly were used as a – long input for the next assembly. The resulting transcripts of the final assembly (the brown trout transcriptome) were then annotated using Blast and all available Ensembl cDNA sequences for zebrafish (*Danio rerio*), medaka (*Oryzias latipes*), Nile tilapia (*Oreochromis niloticus*), stickleback (*Gasterosteus aculeatus*), human and mouse (Release 69; October 2012), (non-human) vertebrate RefSeq RNA and protein sequences and EST sequences (Database of 2012-11-09). In addition, transcripts were also annotated using the Blast service at the Bioportal, University of Oslo, using the non-redundant nucleotides (nt) and proteins (nr) databases [5]. The resulting blast outputs were parsed using the blast2table.pl script from <ftp://ftp.genome.ou.edu/pub/programs/Blast2table> keeping only the top hits with an e-value cut off <  $1e^{-15}$ . Annotations were assigned in the following preferential order: zebrafish, medaka, Nile tilapia, stickleback, human, mouse (Ensembl cDNA), RefSeq vertebrates RNA, nt, RefSeq vertebrates proteins, and nr. When no annotation could be found, the transcript ID was given.

Gene expression was determined in the gill, gut, kidney and liver of fish inhabiting the metal-contaminated river Hayle and the reference river Teign using RSEM [6]. To reduce the redundancy of the dataset, accession numbers of the various annotations were used as gene ID and the

transcript names generated by Oases were used as transcript IDs. Reads were mapped against the brown trout reference transcriptome (generated using the `--no_polyA` parameter) and using default settings. Subsequent analyses in RSEM were conducted using a selection of scripts provided as part of the Trinity assembly package (version r2012-10-05; [7], following the differential expression analysis pipeline described on [http://trinityrnaseq.sourceforge.net/analysis/diff\\_expression\\_analysis.html](http://trinityrnaseq.sourceforge.net/analysis/diff_expression_analysis.html). Statistical differences in gene expression levels between tissues of the 2 rivers were calculated using edgeR [8]. Genes were considered differentially expressed when FDR < 0.1 (Benjamini-Hochberg correction). Hierarchical clustering was performed on all differentially expressed genes (> 2-fold and FDR < 0.1) between Teign and Hayle brown trout using the `analyze_diff_expr.pl` script provided by Trinity [6]. Hierarchical trees were generated using the Euclidean distance metric and complete linkage clustering. A 4-way Venn diagram showing overlapping differentially-expressed genes was produced using VennDiagram [9] in R/Bioconductor.

All analyses were carried out on a local server running under the NEBC Bio-Linux 7 environment [10] unless stated otherwise.

#### *RT-QPCR validation of gene expression profiles in Hayle and Teign fish*

Validation of the quantification of gene expression in Teign and Hayle fish was conducted using real time quantitative PCR (RT-QPCR) for five transcripts (*mtb*, *gpx1b*, *cat*, *slc40a1* and *arpc3*), in gill, gut, kidney and liver samples from all individual fish. Primers for each target gene were designed with Beacon Designer 3.0 software (Premier Biosoft International, Paulo Alto, CA) using the transcript sequences assembled during this project. Specificity of primer sets throughout the range of detection was confirmed by the observation of single amplification products of the expected size and  $T_m$ , and optimised by performing a standard curve for each primer pair as described by Filby and Tyler [11]. Over the detection range, the linear correlation ( $R^2$ ) between the mean Ct and the logarithm of the cDNA dilution was > 0.99 in each case, and efficiencies were between 1.943- 2.134. The sequences, PCR product sizes, annealing temperatures and PCR efficiencies for each primer pair are shown in Table S3. cDNA was synthesised according to manufacturer's instructions from 2  $\mu$ g of total RNA treated with RQ1 DNase (Promega, Southampton, UK), using random hexamers (MWG-Biotech) and M-MLV reverse transcriptase (Promega). cDNA was diluted (1:2) then RT-QPCR was performed using an iCycler iQ Real-time Detection System (Bio-Rad Laboratories, Hercules, CA) with SYBR Green chemistry as described by Filby and Tyler [11]. A template-minus negative control was run in triplicate on each plate to verify the absence of cDNA contamination. Efficiency-corrected relative expression levels were determined by normalizing to the control gene, Actin-related protein 2/3 complex 3 (*arpc3*). To select an appropriate control gene, we examined our assembly to find transcripts where expression levels were high and consistent between Hayle and Teign fish for all tissues. A comparison between the expression ratios (Hayle/Teign) in the gill, gut, kidney and liver for *arpc3* and other candidate control genes is presented in Table S3a.

## References

1. Chomczynski, P.; Mackey, K., Modification of the TRI Reagent procedure for isolation of RNA from polysaccharide -and proteoglycan - rich sources. *Biotechniques* **1995**, *19*, 942-945.
2. Hansen, K.D., Brenner, S.E., and Dudoit S. Biases in Illumina transcriptome sequencing caused by random hexamer priming. *Nucleic Acids Research* **2010**, *38* (12), e131.
3. Zerbino and Birney. Velvet: Algorithms for *de novo* short read assembly using de Bruijn graphs. *Genome Research* **2008**, *18*, 821-829.
4. Schulz, M.H., Zerbino, D.R., Vingron, M., and Birney, E. Oases: robust *de novo* RNA-seq assembly across the dynamic range of expression levels. *Bioinformatics* **2012**, *28*, (8), 1086-1092.
5. Kumar, S., Skjæveland, Å., Orr, RJS, Enger, P., Ruden, T., Mevik, B-H., Burki, F., Botnen, A., and Shalchian-Tabrizi, K. AIR: A batch-oriented web program package for construction of supermatrices ready for phylogenomic analyses. *BMC Bioinformatics* **2009**, *10*, 357.
6. Li, B. and Dewey, C.N. RSEM: accurate transcript quantification from RNA-Seq data with or without a reference genome. *BMC Bioinformatics* **2011**, *12*, 323.
7. Grabherr, M.G., Haas, B.J., Yassour, M., Levin, J.Z., Thompson, D.A., Amit, I., Adiconis, X., Fan, L., Raychowdhury, R., Zeng, Q., Chen, Z., Mauceli, E., Hacohen, N., Gnirke, A., Rhind, N., di Palma, F., Birren, B.W., Nusbaum, C., Lindblad-Toh, K., Friedman, N., and Regev, A. Full-length transcriptome assembly from RNA-Seq data without a reference genome. *Nature Biotechnology* **2011**, *29*, 644-652.
8. Robinson, M.D., McCarthy, D.J. and Smyth, G.K. edgeR: a Bioconductor package for differential expression analysis of digital gene expression data. *Bioinformatics* **2010**, *26*, (1), 139–140.
9. Chen, H. and Boutros, P.C. VennDiagram: a package for the generation of highly-customizable Venn and Euler diagrams in R. *BMC Bioinformatics* **2011**, *12*, 35.
10. Field, D., Tiwari, B., Booth, T., Houten, S., Swan, D., Bertrand, N., Thurston, M. Open software for biologists: from famine to feast. *Nature Biotechnology* **2006**, *24*, (7), 801-803.
11. Filby, A. L.; Tyler, C. R., Molecular characterization of estrogen receptors 1, 2a, and 2b and their tissue and ontogenic expression profiles in fathead minnow (*Pimephales promelas*). *Biology of reproduction* **2005**, *73*, (4), 648.
12. Huang, D. W.; Sherman, B. T.; Lempicki, R. A., Systematic and integrative analysis of large gene lists using DAVID bioinformatics resources. *Nature Protocols* **2008**, *4*, (1), 44-57.

**Table S1** - Metal concentrations in the river Hayle and river Teign. Mean values, and range of values, are presented from data collected at monthly intervals by the Environment Agency monitoring programme throughout the year between 1990-1996 and 2010-2012 for the river Hayle, and from 1991-2012 (zinc only) and 1991-1995 (all other metals) for the river Teign. The data contained in this table was kindly provided by the UK Environment Agency.

|         | River Hayle (Relubbus) |                       | River Teign (Gidleigh Park) |                       |
|---------|------------------------|-----------------------|-----------------------------|-----------------------|
|         | Total metal (µg/L)     | Filtered metal (µg/L) | Total metal (µg/L)          | Filtered metal (µg/L) |
| Zinc    | 638.9 (404-858)        | 599.2 (390-780)       | 10.4 (2-204)                | 4.7 (2-12)            |
| Copper  | 42.3 (24-193)          | 34.9 (17-86.5)        | <1 (<1)                     | -                     |
| Iron    | 199.2 (60-2690)        | 80.5 (34-210)         | 172.0 (50-760)              | 128.9 (60-280)        |
| Arsenic | 8.4 (1.1-101)          | 4.5 (0.4-8)           | 1.2 (0.6-5.4)               | 1.0 (0.5-2.4)         |
| Cadmium | 1.4 (0.9-4)            | 1.3 (0.9-1.6)         | <0.2 (<0.2)                 | <0.2 (<0.2)           |
| Nickel  | 27.1 (18-39)           | 25.8 (17.6-37.4)      | 1.0 (1)                     | 1.3 (1-2)             |
| Lead    | <2 (<1-12)             | <2 (<2)               | <1 (<1)                     | <1 (<1)               |

**Table S2** - Description of cDNA libraries sequenced. Mixed tissue samples from the Hayle and the Teign contained equal amounts of RNA from the heart, spleen, head kidney, eye, brain, pituitary, muscle, skin and caudal fin.

| Sample no. | Sample description                            | Lane no. | Read characteristics           |
|------------|-----------------------------------------------|----------|--------------------------------|
| 1          | Embryonic<br>(10 developmental stages pooled) | 1        | 100 bp paired end              |
| 2          | Teign Mixed Tissue                            | 2        | 76 bp paired end (multiplexed) |
| 3          | Hayle Mixed Tissue                            | 2        | 76 bp paired end (multiplexed) |
| 4          | Hayle Gill                                    | 2        | 76 bp paired end (multiplexed) |
| 5          | Hayle Gut                                     | 2        | 76 bp paired end (multiplexed) |
| 6          | Hayle Kidney                                  | 2        | 76 bp paired end (multiplexed) |
| 7          | Hayle Liver                                   | 2        | 76 bp paired end (multiplexed) |
| 8          | Teign Gill                                    | 2        | 76 bp paired end (multiplexed) |
| 9          | Teign Gut                                     | 2        | 76 bp paired end (multiplexed) |
| 10         | Teign Kidney                                  | 2        | 76 bp paired end (multiplexed) |
| 11         | Teign Liver                                   | 2        | 76 bp paired end (multiplexed) |
| 12         | Teign Ovary                                   | 2        | 76 bp paired end (multiplexed) |
| 13         | Teign Testis                                  | 2        | 76 bp paired end (multiplexed) |

**Table S3a** – Fold changes in expression level quantified by RNA-seq of potential control genes for RT-QPCR analysis.

| Gene                                     |               | Fold change (Hayle/Teign) in expression |      |        |       |
|------------------------------------------|---------------|-----------------------------------------|------|--------|-------|
|                                          |               | Gill                                    | Gut  | Kidney | Liver |
| Actin-related protein 2/3 complex 3      | <i>arpc3</i>  | 1.25                                    | 1.17 | 0.97   | 1.10  |
| Ribosomal protein L8                     | <i>rpl8</i>   | 0.92                                    | 0.61 | 0.49   | 0.77  |
| Ribosomal protein L7                     | <i>rpl7</i>   | 1.25                                    | 1.27 | 0.75   | 2.04  |
| Beta Actin                               | <i>bactin</i> | 1.25                                    | 1.18 | 0.72   | 1.41  |
| Glucose-6-phosphate dehydrogenase        | <i>g6pdh</i>  | 1.67                                    | 1.53 | 0.75   | 1.49  |
| Glyceraldehyde-3-phosphate dehydrogenase | <i>gapdh</i>  | 0.58                                    | 0.95 | 1.75   | 0.61  |

**Table S3b** – Target genes, primers and assay details for RT-QPCR analysis.

| Target Gene                         |                | Forward Primer (5'-3') | Reverse Primer (5'-3') | Product size (bp) | Ta (°C) | PCR efficiency |
|-------------------------------------|----------------|------------------------|------------------------|-------------------|---------|----------------|
| Actin-related protein 2/3 complex 3 | <i>arpc3</i>   | CCAGCAACAAGCAGGAAGAC   | ACGGTCACACAGCCTCAG     | 83                | 58.5    | 96.2 %         |
| Ferroportin                         | <i>slc401a</i> | GGCACATAGAGCACAGGTTC   | GACAGGACAGCAGCAAGC     | 162               | 58.5    | 113.4 %        |
| Metallothionein b                   | <i>mtb</i>     | ACCAGTTGTGAAAGCAAG     | GTCAGTCATAGGGAATGG     | 155               | 55.0    | 109.9 %        |
| Glutathione peroxidase 1b           | <i>gpx1b</i>   | GCCAAGCACATTTCCCAAAG   | GAGAGCCATTCAAGCGTTATG  | 200               | 55.0    | 94.3 %         |
| Catalase                            | <i>cat</i>     | CGGCTCTCACACCTTCAAG    | GTCTCGGATGGCGTAGTC     | 148               | 57.0    | 102.9 %        |



**Figure S1:** Cluster diagrams displaying the concentration of each metal in individual fish from the river Hayle (h1-h5) and river Teign (t1-t10), illustrating the similarity of distribution profiles of metals in each tissue. Values given are log transformed metal concentrations ( $\mu\text{g/g}$ ).

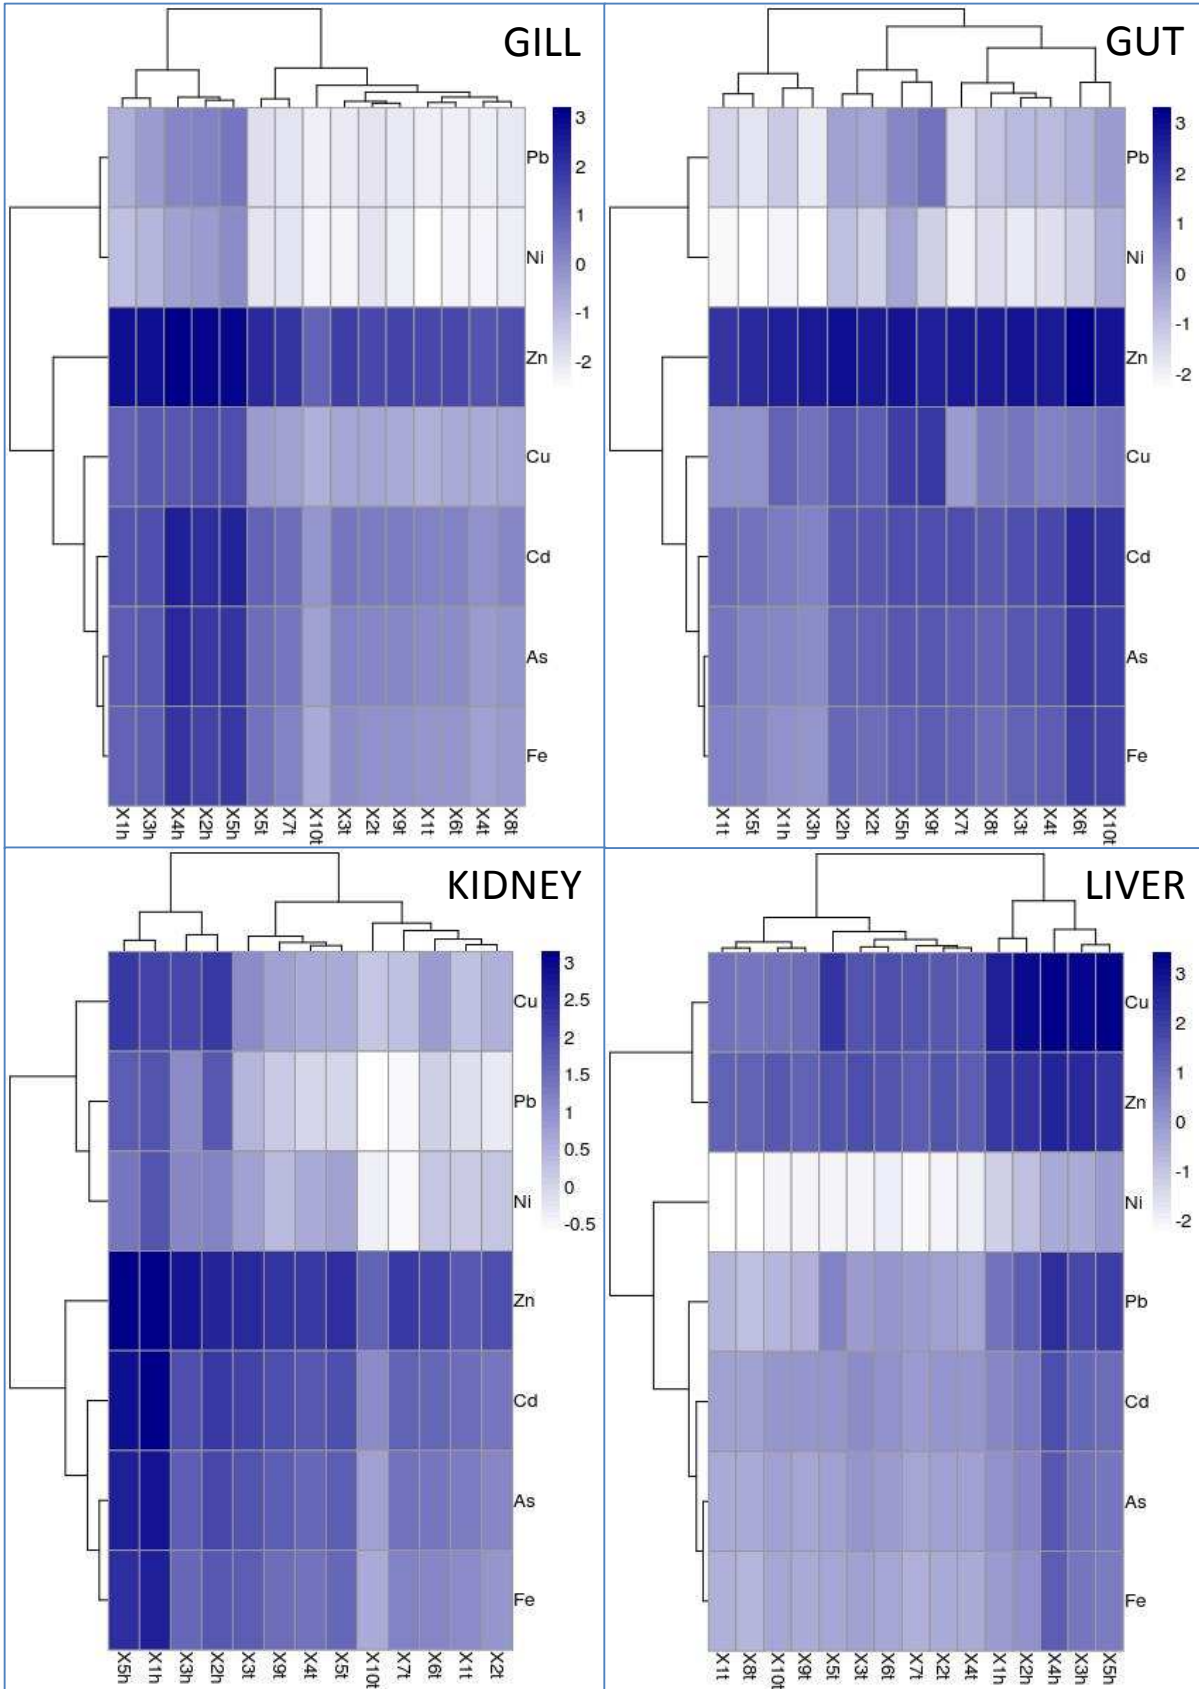

**Table S4** - Summary statistics of raw sequencing reads, numbers of reads retained after adaptor removal and quality filtering and retained for input into transcriptome assembly as either paired reads or orphans. 1 and 2 refer to the forward and reverse reads in each paired-end sequence read.

| Sample                     | No. raw reads     |                   | Adaptors removed  |                   | Quality Filtered  |                   | No. Paired reads  |                   | No. orphans      |                  |
|----------------------------|-------------------|-------------------|-------------------|-------------------|-------------------|-------------------|-------------------|-------------------|------------------|------------------|
|                            | Read 1            | Read 2            | Read 1           | Read 2           |
| Hayle Gill                 | 2,936,116         | 2,936,116         | 2,680,643         | 2,683,739         | 2,455,767         | 2,520,215         | 2,156,170         | 2,156,170         | 299,597          | 364,045          |
| Hayle Gut                  | 3,198,880         | 3,198,880         | 2,912,539         | 2,916,540         | 2,659,209         | 2,724,901         | 2,321,001         | 2,321,001         | 338,208          | 403,900          |
| Hayle Kidney               | 3,587,826         | 3,587,826         | 3,272,885         | 3,276,952         | 2,996,962         | 3,090,315         | 2,637,910         | 2,637,910         | 359,052          | 452,405          |
| Hayle Liver                | 3,648,593         | 3,648,593         | 3,329,308         | 3,334,596         | 3,043,407         | 3,124,718         | 2,669,069         | 2,669,069         | 374,338          | 455,649          |
| Hayle Mixed Tissue         | 2,541,870         | 2,541,870         | 2,303,275         | 2,305,787         | 2,099,076         | 2,156,734         | 1,825,364         | 1,825,364         | 273,712          | 331,370          |
| Teign Gill                 | 3,489,607         | 3,489,607         | 3,186,023         | 3,189,248         | 2,912,245         | 2,993,566         | 2,555,857         | 2,555,857         | 356,388          | 437,709          |
| Teign Gut                  | 3,418,757         | 3,418,757         | 3,115,427         | 3,118,565         | 2,850,298         | 2,930,476         | 2,500,343         | 2,500,343         | 349,955          | 430,133          |
| Teign Kidney               | 3,147,358         | 3,147,358         | 2,875,181         | 2,877,401         | 2,637,264         | 2,710,844         | 2,321,788         | 2,321,788         | 315,476          | 389,056          |
| Teign Liver                | 3,855,726         | 3,855,726         | 3,523,064         | 3,527,418         | 3,215,926         | 3,300,338         | 2,818,972         | 2,818,972         | 396,954          | 481,366          |
| Teign Ovary                | 2,591,346         | 2,591,346         | 2,364,740         | 2,368,163         | 2,166,788         | 2,198,275         | 1,886,219         | 1,886,219         | 280,569          | 312,056          |
| Teign Testis               | 3,540,738         | 3,540,738         | 3,228,934         | 3,235,082         | 2,942,162         | 3,028,973         | 2,577,349         | 2,577,349         | 364,813          | 451,624          |
| Teign Mixed Tissue         | 3,415,701         | 3,415,701         | 3,099,156         | 3,106,756         | 2,820,832         | 2,907,199         | 2,460,718         | 2,460,718         | 360,114          | 446,481          |
| <b>Total Adult Tissues</b> | <b>39,372,518</b> | <b>39,372,518</b> | <b>35,891,175</b> | <b>35,940,247</b> | <b>32,799,936</b> | <b>33,686,554</b> | <b>28,730,760</b> | <b>28,730,760</b> | <b>4,069,176</b> | <b>4,955,794</b> |
| Embryonic                  | 34,411,228        | 34,411,228        | 30,970,124        | 29,448,455        | 30,829,882        | 29,311,104        | 27,162,593        | 27,162,593        | 3,667,289        | 2,148,511        |
| <b>TOTAL</b>               | <b>73,783,746</b> | <b>73,783,746</b> | <b>66,861,299</b> | <b>65,388,702</b> | <b>63,629,818</b> | <b>62,997,658</b> | <b>55,893,353</b> | <b>55,893,353</b> | <b>7,736,465</b> | <b>7,104,305</b> |

**Table S5** - Number of transcripts in the final transcriptome assembly and relative expression levels for each tissue. Expression is presented as Fragments Per Kilobase of Exon Per Million Fragments Mapped (FPKM).

| Expression level (FPKM)            | No. transcripts |              |              |              |              |              |              |              |
|------------------------------------|-----------------|--------------|--------------|--------------|--------------|--------------|--------------|--------------|
|                                    | H Gill          | T Gill       | H Gut        | T Gut        | H Kidney     | T Kidney     | H Liver      | T Liver      |
| ≤ 1                                | 1194            | 1472         | 2825         | 2626         | 1874         | 1314         | 5348         | 4893         |
| 1-10                               | 30608           | 33783        | 27904        | 29047        | 34121        | 28273        | 24208        | 23809        |
| 10-100                             | 13587           | 13758        | 8790         | 8992         | 12834        | 13911        | 4431         | 4306         |
| 100-1000                           | 1094            | 1068         | 953          | 978          | 1039         | 1122         | 603          | 656          |
| > 1000                             | 117             | 116          | 86           | 110          | 96           | 155          | 102          | 130          |
| <b>Total transcripts expressed</b> | <b>46600</b>    | <b>50197</b> | <b>40558</b> | <b>41753</b> | <b>49964</b> | <b>44775</b> | <b>34693</b> | <b>33794</b> |
| <b>Transcripts not expressed</b>   | <b>50083</b>    | <b>46486</b> | <b>56125</b> | <b>54930</b> | <b>46719</b> | <b>51908</b> | <b>61991</b> | <b>62889</b> |

**Table S6** - Comparison between the fold differences in expression levels for selected transcripts generated based on the global analysis (RNA-Seq) and on the individual gene quantification (RT-QPCR). Values presented are mean expression of transcripts for the Hayle population relative to Teign (Hayle; n=5, Teign; n=10). Fold differences in expression measured using RNA-Seq are in blue, and those obtained by RT-QPCR are in red. Asterisks indicate a significant difference in expression between the two populations.

| Gene           | Gill           | Gut            | Kidney      | Liver           |
|----------------|----------------|----------------|-------------|-----------------|
| <i>slc40a1</i> | 1.2<br>0.7     | 1.7<br>0.8     | 4.3<br>0.5  | 1.2<br>1.3      |
| <i>mtb</i>     | 8.2 *<br>9.8 * | 7.7 *<br>5.7 * | 2.2<br>7.1  | 5.6 *<br>14.7 * |
| <i>gpx1b</i>   | 2.5<br>0.8     | 1.3<br>9.1     | 0.48<br>0.8 | 1.6<br>1.5      |
| <i>cat</i>     | 1.1<br>0.2     | 1.1<br>1.2     | 0.4<br>1.2  | 0.9<br>0.2      |

**Figure S2-** Heatmaps illustrating changes in gene expression for all differentially expressed genes (> 2-fold and FDR < 0.1) between Teign and Hayle brown trout, in the four separate tissues. Hierarchical trees were generated using the Euclidean distance metric and complete linkage clustering.

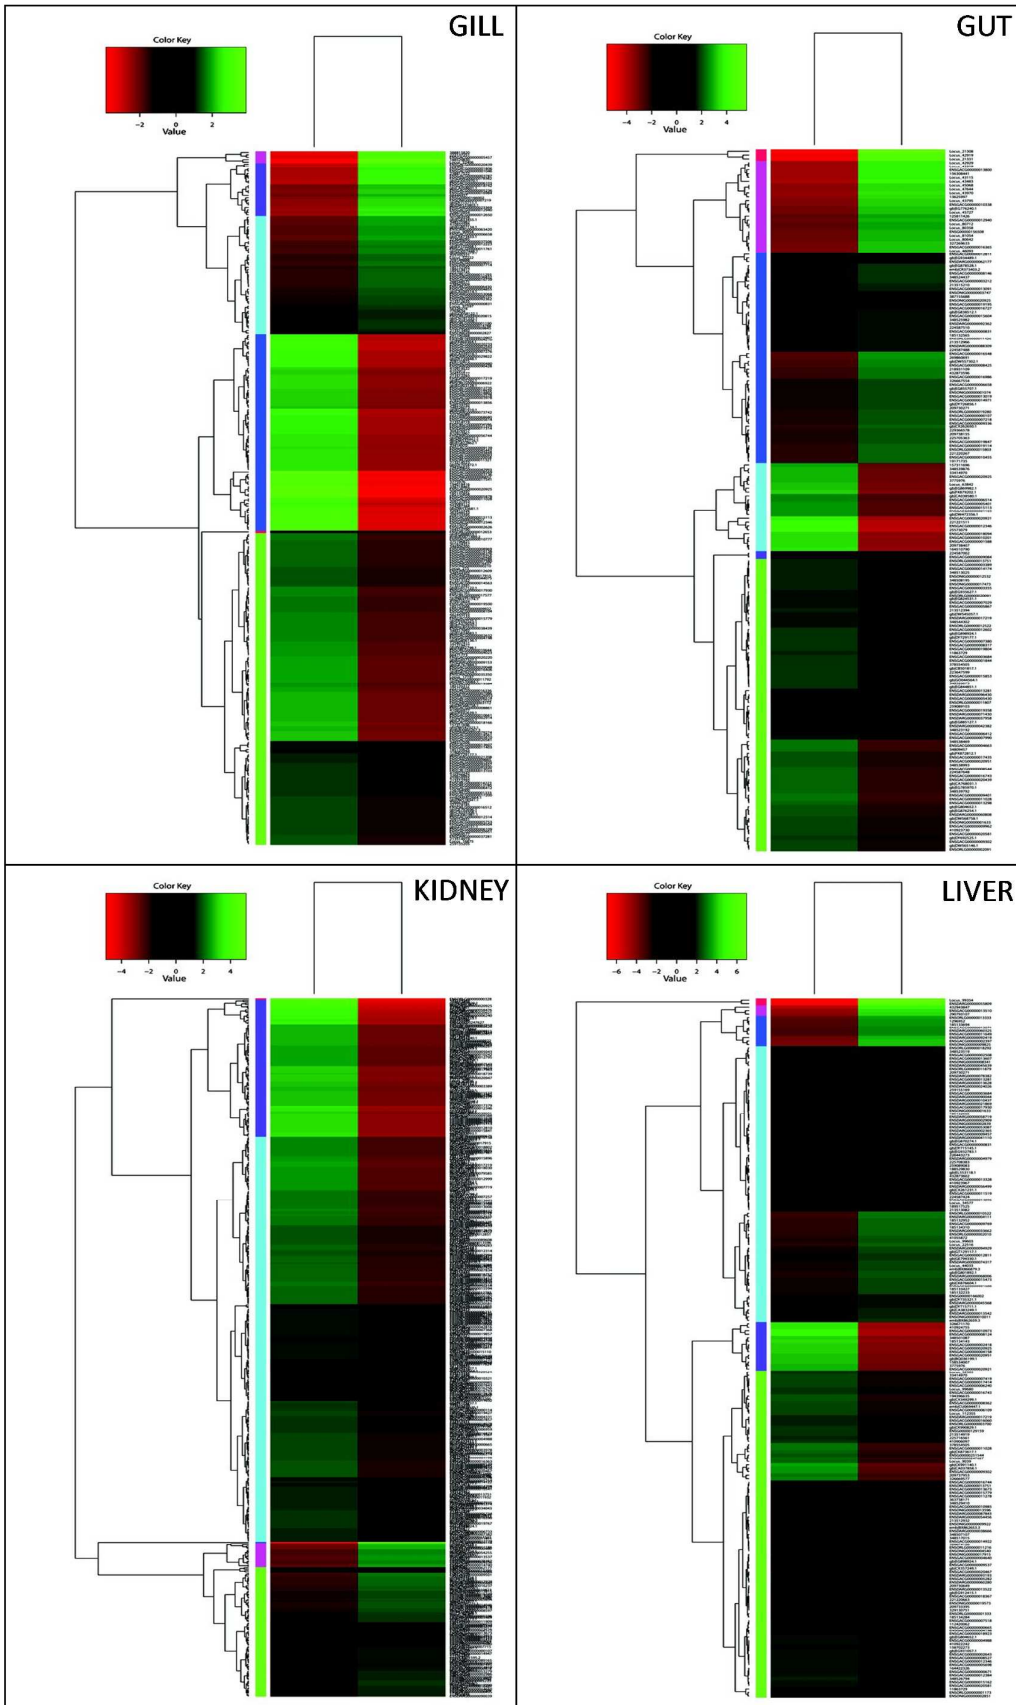

**Table S7-** Gene Ontology Terms over-represented in the lists of differentially expressed genes between Hayle and Teign fish for each tissue. Values presented are the number and percentage of genes in the tissue-specific gene lists associated with each term and the P-values associated with this over-representation. This analysis was conducted using the Database for Annotation, Visualisation and Integrated Discovery (DAVID v6.7; [12]), using our whole brown trout transcriptome assembly as a background.

| <b>GUT</b>    |                                                     |       |      |          |            |           |          |              |
|---------------|-----------------------------------------------------|-------|------|----------|------------|-----------|----------|--------------|
| Category      | Term                                                | Count | %    | P-Value  | Bonferroni | Benjamini | FDR      | Fisher Exact |
| GOTERM_BP_FAT | Proteolysis                                         | 11    | 7.10 | 8.90E-06 | 7.50E-04   | 7.50E-04  | 9.60E-03 | 1.60E-06     |
| GOTERM_BP_FAT | platelet activation                                 | 2     | 1.30 | 2.00E-02 | 8.10E-01   | 5.70E-01  | 1.90E+01 | 1.60E-04     |
| GOTERM_BP_FAT | cell activation                                     | 2     | 1.3  | 5.80E-02 | 9.90E-01   | 8.10E-01  | 4.70E+01 | 1.70E-03     |
| GOTERM_BP_FAT | Coagulation                                         | 2     | 1.3  | 6.50E-02 | 1.00E+00   | 7.60E-01  | 5.20E+01 | 2.10E-03     |
| GOTERM_BP_FAT | Hemostasis                                          | 2     | 1.3  | 6.50E-02 | 1.00E+00   | 7.60E-01  | 5.20E+01 | 2.10E-03     |
| GOTERM_BP_FAT | regulation of body fluid levels                     | 2     | 1.3  | 6.50E-02 | 1.00E+00   | 7.60E-01  | 5.20E+01 | 2.10E-03     |
| GOTERM_BP_FAT | blood coagulation                                   | 2     | 1.3  | 6.50E-02 | 1.00E+00   | 7.60E-01  | 5.20E+01 | 2.10E-03     |
| GOTERM_BP_FAT | protein polymerization                              | 2     | 1.3  | 9.50E-02 | 1.00E+00   | 8.10E-01  | 6.60E+01 | 4.60E-03     |
|               |                                                     |       |      |          |            |           |          |              |
| GOTERM_CC_FAT | extracellular space                                 | 5     | 3.2  | 1.30E-05 | 3.70E-04   | 3.70E-04  | 1.10E-02 | 3.80E-07     |
| GOTERM_CC_FAT | extracellular region                                | 8     | 5.2  | 1.20E-04 | 3.50E-03   | 1.70E-03  | 1.00E-01 | 2.00E-05     |
| GOTERM_CC_FAT | extracellular region part                           | 5     | 3.2  | 1.10E-03 | 3.00E-02   | 1.00E-02  | 8.90E-01 | 1.00E-04     |
| GOTERM_CC_FAT | fibrinogen complex                                  | 2     | 1.3  | 8.20E-03 | 2.10E-01   | 5.80E-02  | 6.70E+00 | 1.80E-05     |
|               |                                                     |       |      |          |            |           |          |              |
| GOTERM_MF_FAT | serine hydrolase activity                           | 8     | 5.2  | 4.30E-07 | 3.30E-05   | 3.30E-05  | 4.60E-04 | 2.50E-08     |
| GOTERM_MF_FAT | serine-type peptidase activity                      | 8     | 5.2  | 4.30E-07 | 3.30E-05   | 3.30E-05  | 4.60E-04 | 2.50E-08     |
| GOTERM_MF_FAT | serine-type endopeptidase activity                  | 7     | 4.5  | 1.90E-06 | 1.50E-04   | 7.40E-05  | 2.00E-03 | 1.00E-07     |
| GOTERM_MF_FAT | peptidase activity, acting on L-amino acid peptides | 11    | 7.1  | 8.10E-06 | 6.30E-04   | 2.10E-04  | 8.60E-03 | 1.30E-06     |
| GOTERM_MF_FAT | peptidase activity                                  | 11    | 7.1  | 1.80E-05 | 1.40E-03   | 3.40E-04  | 1.90E-02 | 3.10E-06     |
| GOTERM_MF_FAT | endopeptidase activity                              | 8     | 5.2  | 1.10E-04 | 8.50E-03   | 1.70E-03  | 1.20E-01 | 1.50E-05     |
| GOTERM_MF_FAT | carboxypeptidase activity                           | 3     | 1.9  | 5.00E-03 | 3.20E-01   | 6.20E-02  | 5.20E+00 | 1.70E-04     |
| GOTERM_MF_FAT | protein binding, bridging                           | 2     | 1.3  | 2.40E-02 | 8.50E-01   | 2.40E-01  | 2.30E+01 | 2.40E-04     |
| GOTERM_MF_FAT | exopeptidase activity                               | 3     | 1.9  | 3.80E-02 | 9.50E-01   | 3.10E-01  | 3.40E+01 | 3.90E-03     |
| GOTERM_MF_FAT | metallocarboxypeptidase activity                    | 2     | 1.3  | 5.20E-02 | 9.80E-01   | 3.70E-01  | 4.30E+01 | 1.30E-03     |

| <b>KIDNEY</b> |                                |       |     |          |            |           |          |              |
|---------------|--------------------------------|-------|-----|----------|------------|-----------|----------|--------------|
| Category      | Term                           | Count | %   | P-Value  | Bonferroni | Benjamini | FDR      | Fisher Exact |
| GOTERM_BP_ALL | response to organic substance  | 4     | 3.3 | 3.50E-04 | 8.20E-02   | 8.20E-02  | 4.50E-01 | 1.20E-05     |
| GOTERM_BP_ALL | response to estradiol stimulus | 2     | 1.6 | 1.10E-02 | 9.30E-01   | 7.40E-01  | 1.30E+01 | 4.20E-05     |
| GOTERM_BP_ALL | homeostatic process            | 4     | 3.3 | 1.70E-02 | 9.90E-01   | 7.60E-01  | 2.00E+01 | 2.30E-03     |
| GOTERM_BP_ALL | response to estrogen stimulus  | 2     | 1.6 | 1.80E-02 | 9.90E-01   | 6.80E-01  | 2.10E+01 | 1.40E-04     |
| GOTERM_BP_ALL | chemical homeostasis           | 3     | 2.4 | 2.20E-02 | 1.00E+00   | 6.60E-01  | 2.50E+01 | 1.60E-03     |

|               |                                                  |    |     |          |          |          |          |          |
|---------------|--------------------------------------------------|----|-----|----------|----------|----------|----------|----------|
| GOTERM_BP_ALL | response to hexose stimulus                      | 2  | 1.6 | 2.20E-02 | 1.00E+00 | 5.90E-01 | 2.50E+01 | 2.10E-04 |
| GOTERM_BP_ALL | response to carbohydrate stimulus                | 2  | 1.6 | 2.20E-02 | 1.00E+00 | 5.90E-01 | 2.50E+01 | 2.10E-04 |
| GOTERM_BP_ALL | response to steroid hormone stimulus             | 2  | 1.6 | 2.20E-02 | 1.00E+00 | 5.90E-01 | 2.50E+01 | 2.10E-04 |
| GOTERM_BP_ALL | response to glucose stimulus                     | 2  | 1.6 | 2.20E-02 | 1.00E+00 | 5.90E-01 | 2.50E+01 | 2.10E-04 |
| GOTERM_BP_ALL | response to monosaccharide stimulus              | 2  | 1.6 | 2.20E-02 | 1.00E+00 | 5.90E-01 | 2.50E+01 | 2.10E-04 |
| GOTERM_BP_ALL | regulation of transcription, DNA-dependent       | 10 | 8.1 | 2.60E-02 | 1.00E+00 | 6.00E-01 | 2.90E+01 | 1.10E-02 |
| GOTERM_BP_ALL | regulation of RNA metabolic process              | 10 | 8.1 | 2.70E-02 | 1.00E+00 | 5.60E-01 | 3.00E+01 | 1.20E-02 |
| GOTERM_BP_ALL | regulation of macromolecule biosynthetic process | 11 | 8.9 | 3.80E-02 | 1.00E+00 | 6.50E-01 | 3.90E+01 | 1.90E-02 |
| GOTERM_BP_ALL | regulation of biosynthetic process               | 11 | 8.9 | 3.90E-02 | 1.00E+00 | 6.20E-01 | 4.00E+01 | 1.90E-02 |
| GOTERM_BP_ALL | regulation of cellular biosynthetic process      | 11 | 8.9 | 3.90E-02 | 1.00E+00 | 6.20E-01 | 4.00E+01 | 1.90E-02 |
| GOTERM_BP_ALL | response to chemical stimulus                    | 4  | 3.3 | 3.90E-02 | 1.00E+00 | 5.80E-01 | 4.00E+01 | 7.10E-03 |
| GOTERM_BP_ALL | response to hormone stimulus                     | 2  | 1.6 | 4.00E-02 | 1.00E+00 | 5.60E-01 | 4.10E+01 | 7.50E-04 |
| GOTERM_BP_ALL | glucose metabolic process                        | 3  | 2.4 | 4.20E-02 | 1.00E+00 | 5.50E-01 | 4.30E+01 | 4.50E-03 |
| GOTERM_BP_ALL | carboxylic acid metabolic process                | 5  | 4.1 | 4.20E-02 | 1.00E+00 | 5.30E-01 | 4.30E+01 | 1.10E-02 |
| GOTERM_BP_ALL | oxoacid metabolic process                        | 5  | 4.1 | 4.20E-02 | 1.00E+00 | 5.30E-01 | 4.30E+01 | 1.10E-02 |
| GOTERM_BP_ALL | organic acid metabolic process                   | 5  | 4.1 | 4.40E-02 | 1.00E+00 | 5.20E-01 | 4.40E+01 | 1.20E-02 |
| GOTERM_BP_ALL | cellular ketone metabolic process                | 5  | 4.1 | 4.50E-02 | 1.00E+00 | 5.10E-01 | 4.50E+01 | 1.20E-02 |
| GOTERM_BP_ALL | regulation of cellular metabolic process         | 11 | 8.9 | 4.60E-02 | 1.00E+00 | 5.00E-01 | 4.60E+01 | 2.40E-02 |
| GOTERM_BP_ALL | response to endogenous stimulus                  | 2  | 1.6 | 4.70E-02 | 1.00E+00 | 4.80E-01 | 4.60E+01 | 1.10E-03 |
|               |                                                  |    |     |          |          |          |          |          |
| GOTERM_MF_FAT | sequence-specific DNA binding                    | 10 | 8.1 | 3.50E-04 | 3.10E-02 | 3.10E-02 | 3.80E-01 | 8.20E-05 |
| GOTERM_MF_FAT | transcription factor activity                    | 10 | 8.1 | 7.10E-03 | 4.70E-01 | 2.80E-01 | 7.50E+00 | 2.50E-03 |
| GOTERM_MF_FAT | hexokinase activity                              | 2  | 1.6 | 1.90E-02 | 8.20E-01 | 4.30E-01 | 1.90E+01 | 1.50E-04 |
| GOTERM_MF_FAT | transcription regulator activity                 | 10 | 8.1 | 3.60E-02 | 9.60E-01 | 5.60E-01 | 3.30E+01 | 1.60E-02 |

| LIVER         |                                |       |     |          |            |           |          |              |
|---------------|--------------------------------|-------|-----|----------|------------|-----------|----------|--------------|
| Category      | Term                           | Count | %   | P-Value  | Bonferroni | Benjamini | FDR      | Fisher Exact |
| GOTERM_BP_FAT | response to organic substance  | 4     | 3.3 | 4.80E-04 | 7.70E-02   | 7.70E-02  | 5.80E-01 | 1.80E-05     |
| GOTERM_BP_FAT | response to estradiol stimulus | 2     | 1.6 | 1.20E-02 | 8.70E-01   | 6.40E-01  | 1.40E+01 | 5.20E-05     |
| GOTERM_BP_FAT | response to estrogen stimulus  | 2     | 1.6 | 2.00E-02 | 9.70E-01   | 6.80E-01  | 2.20E+01 | 1.70E-04     |
| GOTERM_BP_FAT | homeostatic process            | 4     | 3.3 | 2.30E-02 | 9.80E-01   | 6.20E-01  | 2.50E+01 | 3.50E-03     |
| GOTERM_BP_FAT | response to hexose stimulus    | 2     | 1.6 | 2.40E-02 | 9.80E-01   | 5.60E-01  | 2.60E+01 | 2.60E-04     |

|               |                                                                                           |    |     |          |          |          |          |          |
|---------------|-------------------------------------------------------------------------------------------|----|-----|----------|----------|----------|----------|----------|
| GOTERM_BP_FAT | response to steroid hormone stimulus                                                      | 2  | 1.6 | 2.40E-02 | 9.80E-01 | 5.60E-01 | 2.60E+01 | 2.60E-04 |
| GOTERM_BP_FAT | response to glucose stimulus                                                              | 2  | 1.6 | 2.40E-02 | 9.80E-01 | 5.60E-01 | 2.60E+01 | 2.60E-04 |
| GOTERM_BP_FAT | response to monosaccharide stimulus                                                       | 2  | 1.6 | 2.40E-02 | 9.80E-01 | 5.60E-01 | 2.60E+01 | 2.60E-04 |
| GOTERM_BP_FAT | response to carbohydrate stimulus                                                         | 2  | 1.6 | 2.40E-02 | 9.80E-01 | 5.60E-01 | 2.60E+01 | 2.60E-04 |
| GOTERM_BP_FAT | chemical homeostasis                                                                      | 3  | 2.4 | 2.60E-02 | 9.90E-01 | 5.30E-01 | 2.80E+01 | 2.20E-03 |
| GOTERM_BP_FAT | response to hormone stimulus                                                              | 2  | 1.6 | 4.40E-02 | 1.00E+00 | 6.60E-01 | 4.20E+01 | 9.40E-04 |
| GOTERM_BP_FAT | regulation of transcription, DNA-dependent                                                | 10 | 8.1 | 4.80E-02 | 1.00E+00 | 6.40E-01 | 4.50E+01 | 2.30E-02 |
| GOTERM_BP_FAT | regulation of RNA metabolic process                                                       | 10 | 8.1 | 4.90E-02 | 1.00E+00 | 6.10E-01 | 4.60E+01 | 2.40E-02 |
| GOTERM_BP_FAT | glucose metabolic process                                                                 | 3  | 2.4 | 5.10E-02 | 1.00E+00 | 5.80E-01 | 4.70E+01 | 6.10E-03 |
| GOTERM_BP_FAT | response to endogenous stimulus                                                           | 2  | 1.6 | 5.20E-02 | 1.00E+00 | 5.60E-01 | 4.80E+01 | 1.30E-03 |
| GOTERM_BP_FAT | carboxylic acid biosynthetic process                                                      | 3  | 2.4 | 7.20E-02 | 1.00E+00 | 6.50E-01 | 6.00E+01 | 1.00E-02 |
| GOTERM_BP_FAT | organic acid biosynthetic process                                                         | 3  | 2.4 | 7.30E-02 | 1.00E+00 | 6.20E-01 | 6.00E+01 | 1.10E-02 |
| GOTERM_BP_FAT | hexose metabolic process                                                                  | 3  | 2.4 | 7.90E-02 | 1.00E+00 | 6.30E-01 | 6.30E+01 | 1.20E-02 |
| GOTERM_BP_FAT | monosaccharide metabolic process                                                          | 3  | 2.4 | 9.50E-02 | 1.00E+00 | 6.70E-01 | 7.00E+01 | 1.60E-02 |
|               |                                                                                           |    |     |          |          |          |          |          |
| GOTERM_MF_FAT | sequence-specific DNA binding                                                             | 10 | 8.1 | 3.50E-04 | 3.10E-02 | 3.10E-02 | 3.80E-01 | 8.20E-05 |
| GOTERM_MF_FAT | transcription factor activity                                                             | 10 | 8.1 | 7.10E-03 | 4.70E-01 | 2.80E-01 | 7.50E+00 | 2.50E-03 |
| GOTERM_MF_FAT | hexokinase activity                                                                       | 2  | 1.6 | 1.90E-02 | 8.20E-01 | 4.30E-01 | 1.90E+01 | 1.50E-04 |
| GOTERM_MF_FAT | transcription regulator activity                                                          | 10 | 8.1 | 3.60E-02 | 9.60E-01 | 5.60E-01 | 3.30E+01 | 1.60E-02 |
| GOTERM_MF_FAT | carbohydrate kinase activity                                                              | 2  | 1.6 | 7.30E-02 | 1.00E+00 | 7.50E-01 | 5.60E+01 | 2.70E-03 |
| GOTERM_MF_FAT | oxidoreductase activity, acting on NADH or NADPH, quinone or similar compound as acceptor | 2  | 1.6 | 9.40E-02 | 1.00E+00 | 7.70E-01 | 6.60E+01 | 4.60E-03 |
| GOTERM_MF_FAT | NADH dehydrogenase (quinone) activity                                                     | 2  | 1.6 | 9.40E-02 | 1.00E+00 | 7.70E-01 | 6.60E+01 | 4.60E-03 |
| GOTERM_MF_FAT | NADH dehydrogenase (ubiquinone) activity                                                  | 2  | 1.6 | 9.40E-02 | 1.00E+00 | 7.70E-01 | 6.60E+01 | 4.60E-03 |



**Table S8-** List of differentially expressed genes generated using EdgeR including FDR values <0.1 and fold changes (FC) for each tissue. Significantly up-regulated genes in the Hayle fish compared to the Teign fish are highlighted in red and significantly down-regulated genes are highlighted in green. Where no expression was calculated for a transcript in one sample, direction of change is indicated by 'up' or 'down'.

| GeneID              | Symbol/<br>Accession    | Description                                                                         | Database            | GILL     |      | GUT      |       | KIDNEY   |       | LIVER    |      |
|---------------------|-------------------------|-------------------------------------------------------------------------------------|---------------------|----------|------|----------|-------|----------|-------|----------|------|
|                     |                         |                                                                                     |                     | FDR      | FC   | FDR      | FC    | FDR      | FC    | FDR      | FC   |
| ENSGACG00000003077  | <i>abhd12b</i> (2 of 2) | abhydrolase domain containing 12B                                                   | Ensembl_stickleback | -        | -1.4 | -        | 1.5   | 4.41E-02 | 6.4   | -        | -1.1 |
| ENSGACG00000016406  | <i>abi1</i> (1 of 2)    | abl-interactor 1                                                                    | Ensembl_stickleback | -        | 0.0  | 4.41E-02 | down  | -        | -1.4  | -        | down |
| ENSGACG00000020048  | <i>ascl1</i>            | achaete-scute complex homolog 1 (Drosophila)                                        | Ensembl_stickleback | -        | -1.7 | 1.77E-03 | down  | -        | down  | -        | down |
| ENSGACG00000007368  | <i>arpc5</i>            | actin related protein 2/3 complex, subunit 5, 16kDa                                 | Ensembl_stickleback | -        | 1.1  | -        | -1.8  | 8.67E-02 | -6.9  | -        | down |
| ENSGACG00000012675  | <i>actr10</i>           | actin-related protein 10 homolog (S. cerevisiae)                                    | Ensembl_stickleback | -        | up   | -        | down  | 5.65E-02 | down  | -        | down |
| ENSGACG00000014650  | <i>acot11</i> (1 of 2)  | acyl-CoA thioesterase 11                                                            | Ensembl_stickleback | -        | -1.7 | -        | up    | 3.02E-02 | up    | -        | -1.4 |
| ENSGACG00000006135  | <i>adam10</i>           | ADAM metalloproteinase domain 10                                                    | Ensembl_stickleback | -        | 4.0  | -        | -1.5  | 2.72E-02 | -7.7  | -        | 1.0  |
| ENSGACG00000015076  | <i>adamts1</i>          | ADAM metalloproteinase with thrombospondin type 1 motif, 1                          | Ensembl_stickleback | -        | -1.5 | -        | -5.2  | 4.76E-02 | 9.9   | -        | 2.2  |
| ENSORLG00000006708  | <i>ak1</i>              | adenylate kinase 1                                                                  | Ensembl_medaka      | -        | 1.8  | -        | -8.3  | 3.11E-02 | -24.3 | -        | up   |
| ENSODARG00000042382 | <i>arf4</i> (2 of 3)    | ADP-ribosylation factor 4                                                           | Ensembl_zebrafish   | 4.69E-02 | down | -        | down  | -        | -1.6  | -        | up   |
| 5453305             | AF141606.1              | AF141606 Salmo salar clone 12(B) immunoglobulin heavy chain (IgD) mRNA, partial cds | nt                  | -        | up   | -        | 2.9   | 7.14E-03 | -11.2 | -        | 2.8  |
| 14581944            | AF256852.1              | AF256852 Salmo salar clone BHMS395 microsatellite sequence                          | nt                  | -        | -1.1 | -        | -1.2  | 3.02E-02 | 18.1  | -        | -1.1 |
| 13625997            | AAK35224.1              | AF367368_1 yolk ferritin                                                            | nr                  | 1.17E-06 | up   | -        | 0.0   | -        | 0.0   | -        | 0.0  |
| ENSORLG00000017577  | <i>agps</i>             | alkylglycerone phosphate synthase                                                   | Ensembl_medaka      | -        | -2.2 | 1.27E-03 | down  | -        | -2.4  | -        | up   |
| ENSGACG00000013328  | <i>alyref</i>           | Aly/REF export factor                                                               | Ensembl_stickleback | -        | 1.4  | -        | 1.7   | -        | 1.6   | 1.59E-02 | 10.5 |
| AM402664            | emb AM402664.1          | AM402664 Salmo salar liver Parr Salmo salar cDNA clone liv_ali_L3E5, mRNA sequence. | EST_others          | -        | 1.0  | 3.54E-02 | -6.9  | -        | 0.0   | -        | -1.4 |
| ENSGACG00000000493  | <i>npepl1</i>           | aminopeptidase-like 1                                                               | Ensembl_stickleback | -        | 1.7  | -        | 2.3   | 5.65E-02 | down  | -        | 0.0  |
| ENSODARG00000013856 | <i>amy2a</i>            | amylase, alpha 2A; pancreatic                                                       | Ensembl_zebrafish   | -        | 0.0  | 2.58E-06 | -24.0 | -        | 0.0   | -        | -2.8 |
| ENSGACG00000013115  | <i>aplp2</i>            | amyloid beta (A4) precursor-like protein 2                                          | Ensembl_stickleback | -        | down | -        | down  | 6.99E-02 | down  | -        | down |
| ENSGACG00000018367  | <i>anxa6</i>            | annexin A6                                                                          | Ensembl_stickleback | -        | 0.0  | -        | 0.0   | 2.51E-04 | down  | 1.57E-03 | down |
| ENSODARG00000070480 | <i>agr2</i>             | anterior gradient homolog 2 (Xenopus laevis)                                        | Ensembl_zebrafish   | -        | 3.3  | -        | -1.1  | 9.43E-02 | 5.5   | -        | 2.8  |
| ENSODARG00000053279 | <i>apln</i>             | apelin                                                                              | Ensembl_zebrafish   | -        | -2.5 | -        | 0.0   | 8.78E-02 | 17.3  | -        | 1.1  |

|                    |                        |                                                                                                |                     |          |        |          |       |          |        |          |        |
|--------------------|------------------------|------------------------------------------------------------------------------------------------|---------------------|----------|--------|----------|-------|----------|--------|----------|--------|
| ENSORLG00000012653 | <i>apob (6 of 6)</i>   | apolipoprotein B (including Ag(x) antigen)                                                     | Ensembl_medaka      | -        | -1.3   | 8.77E-02 | -12.3 | -        | -5.7   | -        | -1.7   |
| ENSGACG00000012729 | <i>apoo (2 of 2)</i>   | apolipoprotein O                                                                               | Ensembl_stickleback | -        | 1.1    | -        | -1.4  | 3.22E-03 | -8.7   | -        | 1.8    |
| ENSORLG00000017624 | <i>aqp1</i>            | aquaporin 1 (Colton blood group)                                                               | Ensembl_medaka      | -        | -1.8   | -        | down  | 8.79E-02 | -5.0   | -        | -1.1   |
| ENSDARG00000007086 | <i>aqp10a</i>          | aquaporin 10a                                                                                  | Ensembl_zebrafish   | -        | up     | 3.50E-05 | -24.9 | -        | 2.2    | -        | 1.2    |
| ENSGACG00000012346 | <i>arg2</i>            | arginase, type II                                                                              | Ensembl_stickleback | 7.49E-12 | down   | 6.21E-08 | down  | 3.52E-10 | -145.8 | 1.48E-02 | down   |
| 388815820          | JQ764761.1             | Arion lusitanicus hypothetical protein mRNA, complete cds                                      | nt                  | -        | 0.0    | 4.98E-05 | up    | -        | 0.0    | -        | 0.0    |
| 188529830          | EU541926.1             | Arion rufus isolate FR1.01 16S ribosomal RNA gene, partial sequence; mitochondrial             | nt                  | -        | up     | 3.77E-12 | 307.9 | -        | up     | 5.87E-02 | 24.0   |
| ENSGACG00000002986 | <i>armc1 (1 of 2)</i>  | armadillo repeat containing 1                                                                  | Ensembl_stickleback | -        | down   | -        | 4.8   | 3.02E-02 | up     | -        | 1.9    |
| ENSGACG00000019091 | <i>asna1</i>           | arsA arsenite transporter, ATP-binding, homolog 1 (bacterial)                                  | Ensembl_stickleback | -        | -145.0 | -        | 1.4   | 4.67E-03 | down   | -        | 3.8    |
| ENSGACG00000007981 | <i>aspg</i>            | asparaginase homolog ( <i>S. cerevisiae</i> )                                                  | Ensembl_stickleback | -        | down   | -        | -3.0  | 6.99E-02 | down   | -        | down   |
| ENSGACG00000007419 | <i>abcc2</i>           | ATP-binding cassette, sub-family C (CFTR/MRP), member 2                                        | Ensembl_stickleback | -        | 0.0    | -        | down  | -        | down   | 5.91E-02 | down   |
| 66471773           | AJ971743.1             | Baetis harrisoni partial mitochondrial 16S rRNA gene for 16S ribosomal RNA, strain BMNH 704090 | nt                  | -        | down   | 5.76E-04 | -13.8 | -        | -1.4   | -        | 0.0    |
| ENSGACG00000015604 | <i>bcl7a</i>           | B-cell CLL/lymphoma 7A                                                                         | Ensembl_stickleback | 3.75E-02 | up     | -        | -2.1  | -        | -1.5   | -        | -1.1   |
| ENSGACG00000004283 | <i>bcl2l1 (1 of 2)</i> | BCL2-like 1                                                                                    | Ensembl_stickleback | -        | up     | -        | down  | 1.22E-03 | down   | -        | 1.2    |
| ENSGACG00000001688 | <i>bmper</i>           | BMP binding endothelial regulator                                                              | Ensembl_stickleback | -        | up     | -        | -2.1  | -        | down   | 1.57E-03 | up     |
| ENSGACG00000012929 | <i>bre</i>             | brain and reproductive organ-expressed (TNFRSF1A modulator)                                    | Ensembl_stickleback | -        | 0.0    | -        | 0.0   | 5.65E-02 | up     | -        | 0.0    |
| ENSDARG00000045568 | <i>bcat1</i>           | branched chain aminotransferase 1, cytosolic                                                   | Ensembl_zebrafish   | -        | 1.6    | -        | up    | -        | 1.5    | 1.46E-04 | 17.6   |
| ENSORLG00000015803 | <i>brox</i>            | BRO1 domain and CAAX motif containing                                                          | Ensembl_medaka      | 3.35E-03 | up     | -        | -1.2  | -        | -2.9   | -        | 2.2    |
| ENSGACG00000004158 | <i>baz1a</i>           | bromodomain adjacent to zinc finger domain, 1A                                                 | Ensembl_stickleback | -        | 1.2    | -        | -1.2  | -        | 2.4    | 3.37E-15 | -318.8 |
| ENSGACG00000005734 | <i>baz2b (4 of 4)</i>  | bromodomain adjacent to zinc finger domain, 2B                                                 | Ensembl_stickleback | -        | down   | -        | 0.0   | 6.04E-02 | -13.7  | -        | 0.0    |
| ENSGACG00000010106 | <i>brd4</i>            | bromodomain containing 4                                                                       | Ensembl_stickleback | -        | -4.3   | -        | -3.4  | 1.09E-03 | -24.1  | -        | -2.8   |
| 213514654          | NP_001134905.1         | Butyrophilin subfamily 2 member A2                                                             | Refseq_proteins     | -        | 1.5    | -        | 1.4   | 9.82E-02 | 5.2    | -        | -1.7   |
| ENSGACG00000005753 | <i>celsr3</i>          | cadherin, EGF LAG seven-pass G-type receptor 3 (flamingo homolog, <i>Drosophila</i> )          | Ensembl_stickleback | -        | -2.2   | 9.39E-03 | down  | 6.99E-02 | up     | -        | 2.5    |
| ENSGACG00000012602 | <i>cabp1 (2 of 2)</i>  | calcium binding protein 1                                                                      | Ensembl_stickleback | 7.32E-02 | down   | -        | 1.7   | -        | -1.5   | -        | -1.6   |
| ENSDARG00000019990 | <i>cabp1a</i>          | calcium binding protein 1a                                                                     | Ensembl_zebrafish   | -        | 2.4    | -        | 1.1   | 8.79E-02 | up     | -        | 2.1    |
| ENSORLG00000010644 | <i>cald1 (1 of 2)</i>  | caldesmon 1                                                                                    | Ensembl_medaka      | -        | -4.2   | 1.77E-03 | -14.4 | -        | 2.9    | -        | 0.0    |
| ENSGACG00000012384 | <i>camta1 (1 of 2)</i> | calmodulin binding transcription activator 1                                                   | Ensembl_stickleback | -        | 1.0    | -        | -2.0  | -        | -2.4   | 2.28E-03 | -46.3  |

|                     |                        |                                                                                          |                     |          |      |          |       |          |       |          |       |
|---------------------|------------------------|------------------------------------------------------------------------------------------|---------------------|----------|------|----------|-------|----------|-------|----------|-------|
| ENSGACG00000016957  | <i>calml4</i>          | calmodulin-like 4                                                                        | Ensembl_stickleback | -        | down | -        | 1.5   | 5.64E-02 | -8.0  | -        | 0.0   |
| ENSGACG00000013281  | <i>capn5 (2 of 2)</i>  | calpain 5                                                                                | Ensembl_stickleback | 9.28E-02 | down | -        | up    | -        | 0.0   | 1.48E-02 | up    |
| ENSGACG00000006412  | <i>cnn1</i>            | calponin 1, basic, smooth muscle                                                         | Ensembl_stickleback | 6.54E-03 | down | 7.64E-03 | down  | 1.42E-03 | down  | -        | 0.0   |
| ENSDARG00000093937  | <i>cnn1b</i>           | calponin 1, basic, smooth muscle, b                                                      | Ensembl_zebrafish   | -        | -1.7 | 5.21E-02 | -5.3  | -        | -1.3  | -        | 1.4   |
| ENSGACG00000014122  | <i>casq1 (2 of 2)</i>  | calsequestrin 1 (fast-twitch, skeletal muscle)                                           | Ensembl_stickleback | -        | -1.1 | -        | 1.3   | 5.65E-02 | down  | -        | up    |
| ENSDARG00000054456  | <i>clip3</i>           | CAP-GLY domain containing linker protein 3                                               | Ensembl_zebrafish   | -        | down | -        | 2.1   | -        | -1.3  | 7.77E-02 | -6.4  |
| ENSDARG00000056499  | <i>ca6</i>             | carbonic anhydrase VI                                                                    | Ensembl_zebrafish   | -        | 1.5  | -        | -2.1  | -        | -1.1  | 4.66E-03 | 37.9  |
| ENSORLGG00000014439 | <i>cel (2 of 3)</i>    | carboxyl ester lipase (bile salt-stimulated lipase)                                      | Ensembl_medaka      | -        | 0.0  | 4.56E-06 | -33.0 | -        | 0.0   | -        | 0.0   |
| ENSDARG00000029822  | <i>cel.2</i>           | carboxyl ester lipase, tandem duplicate 2                                                | Ensembl_zebrafish   | -        | -2.5 | 4.50E-08 | -49.2 | -        | -1.7  | -        | 6.6   |
| ENSDARG00000021339  | <i>cpa5</i>            | carboxypeptidase A5                                                                      | Ensembl_zebrafish   | -        | 1.5  | 1.11E-07 | -35.6 | -        | 1.6   | -        | down  |
| ENSDARG00000045442  | <i>cpb1</i>            | carboxypeptidase B1 (tissue)                                                             | Ensembl_zebrafish   | -        | 0.0  | 1.39E-07 | -34.7 | -        | 0.0   | -        | -1.1  |
| ENSGACG00000015162  | <i>cpb2</i>            | carboxypeptidase B2 (plasma)                                                             | Ensembl_stickleback | -        | -2.7 | -        | 1.6   | -        | 1.8   | 2.26E-03 | -16.4 |
| ENSORLGG00000010823 | <i>ctsc</i>            | cathepsin C                                                                              | Ensembl_medaka      | -        | up   | -        | -1.3  | 5.66E-03 | up    | -        | -1.9  |
| CX349299            | gb CX349299.1          | cclwbtbl015016_0 Coregonus clupeaformis head Coregonus clupeaformis cDNA, mRNA sequence. | EST_others          | -        | 0.0  | -        | 0.0   | -        | 0.0   | 3.22E-03 | down  |
| ENSDARG00000013628  | <i>cd164</i>           | CD164 molecule, sialomucin                                                               | Ensembl_zebrafish   | -        | 1.0  | -        | 1.8   | 4.20E-02 | 6.2   | 7.20E-02 | 6.5   |
| ENSGACG00000017930  | <i>cisd2</i>           | CDGSH iron sulfur domain 2                                                               | Ensembl_stickleback | -        | 2.9  | 2.45E-03 | down  | -        | 2.5   | 3.74E-02 | up    |
| ENSGACG00000004663  | <i>cdca4</i>           | cell division cycle associated 4                                                         | Ensembl_stickleback | 9.28E-02 | down | -        | 2.1   | -        | 1.6   | -        | 1.0   |
| ENSGACG00000006495  | <i>cdca7l</i>          | cell division cycle associated 7-like                                                    | Ensembl_stickleback | -        | 15.5 | -        | up    | 1.59E-02 | up    | -        | 0.0   |
| ENSGACG00000009388  | <i>cep290</i>          | centrosomal protein 290kDa                                                               | Ensembl_stickleback | -        | 0.0  | -        | 0.0   | 1.96E-02 | down  | -        | 0.0   |
| ENSDARG00000002365  | <i>cers5</i>           | ceramide synthase 5                                                                      | Ensembl_zebrafish   | -        | 1.3  | -        | 1.3   | -        | -1.2  | 9.95E-02 | up    |
| ENSGACG00000002643  | <i>cct5</i>            | chaperonin containing TCP1, subunit 5 (epsilon)                                          | Ensembl_stickleback | -        | 1.1  | -        | 0.0   | -        | 0.0   | 8.58E-03 | down  |
| ENSGACG00000019847  | <i>cct7</i>            | chaperonin containing TCP1, subunit 7 (eta)                                              | Ensembl_stickleback | 3.85E-03 | up   | -        | down  | -        | -1.0  | -        | up    |
| ENSGACG00000018739  | <i>cxcl12 (1 of 2)</i> | chemokine (C-X-C motif) ligand 12                                                        | Ensembl_stickleback | -        | 1.3  | -        | down  | 1.43E-09 | -65.8 | -        | 2.2   |
| ENSDARG00000055100  | <i>cxcl12b</i>         | chemokine (C-X-C motif) ligand 12b (stromal cell-derived factor 1)                       | Ensembl_zebrafish   | -        | -1.2 | -        | 1.4   | 8.09E-06 | -20.4 | -        | 1.1   |
| ENSGACG00000008146  | <i>chn2</i>            | chimerin (chimaerin) 2                                                                   | Ensembl_stickleback | 5.86E-02 | up   | -        | up    | -        | up    | -        | up    |
| ENSDARG00000093193  | <i>chia.6</i>          | chitinase, acidic.6                                                                      | Ensembl_zebrafish   | -        | -1.1 | -        | -2.1  | -        | -2.8  | 4.66E-03 | -13.6 |
| ENSGACG00000017379  | <i>clic2</i>           | chloride intracellular channel 2                                                         | Ensembl_stickleback | -        | 0.0  | -        | -1.8  | 4.05E-05 | down  | -        | 0.0   |
| ENSGACG00000007280  | <i>clic4</i>           | chloride intracellular channel 4                                                         | Ensembl_stickleback | -        | -4.0 | -        | 3.7   | 1.96E-02 | down  | -        | down  |
| ENSGACG00000004855  | <i>cbx7 (1 of 2)</i>   | chromobox homolog 7                                                                      | Ensembl_stickleback | -        | 1.2  | 9.01E-02 | 7.5   | -        | up    | -        | 2.2   |
| ENSG00000166002     | <i>c11orf75</i>        | chromosome 11 open reading frame 75                                                      | Ensembl_human       | -        | down | 5.52E-06 | up    | -        | -1.3  | 1.95E-04 | up    |

|                    |                         |                                                                                                                                |                      |          |       |          |       |          |       |          |      |
|--------------------|-------------------------|--------------------------------------------------------------------------------------------------------------------------------|----------------------|----------|-------|----------|-------|----------|-------|----------|------|
| ENSORLG0000001844  | <i>c17orf67</i>         | chromosome 17 open reading frame 67                                                                                            | Ensembl_medaka       | -        | -3.6  | -        | 0.0   | 2.11E-02 | -7.4  | -        | 2.1  |
| ENSORLG00000014223 | <i>c4orf33</i>          | chromosome 4 open reading frame 33                                                                                             | Ensembl_medaka       | -        | 1.2   | 3.54E-02 | -5.8  | -        | -1.3  | -        | 1.3  |
| ENSONIG00000002851 | <i>c9orf16</i>          | chromosome 9 open reading frame 16                                                                                             | Ensembl_nile_tilapia | -        | 3.0   | -        | -1.0  | -        | -1.3  | 7.68E-02 | down |
| ENSORLG00000004586 | <i>ctrc (2 of 2)</i>    | chymotrypsin C (caldecrin)                                                                                                     | Ensembl_medaka       | -        | 0.0   | 1.10E-07 | -37.4 | -        | up    | -        | -3.3 |
| ENSDARG00000068680 | <i>ctrl</i>             | chymotrypsin-like                                                                                                              | Ensembl_zebrafish    | -        | 0.0   | 1.39E-07 | -41.8 | -        | 0.0   | -        | 1.8  |
| ENSONIG00000003112 | <i>cela3a</i>           | chymotrypsin-like elastase family, member 3A                                                                                   | Ensembl_nile_tilapia | -        | 0.0   | 1.82E-03 | -19.3 | -        | 0.0   | -        | 0.0  |
| ENSORLG00000006922 | <i>cela1 (2 of 2)</i>   | chymotrypsin-like elastase family, member 1                                                                                    | Ensembl_medaka       | -        | 1.2   | 1.86E-06 | -27.4 | -        | 0.0   | -        | down |
| ENSDARG00000017314 | <i>cela1 (1 of 7)</i>   | chymotrypsin-like elastase family, member 1                                                                                    | Ensembl_zebrafish    | -        | 1.2   | 2.12E-06 | -39.5 | -        | 0.0   | -        | 0.0  |
| ENSONIG00000006852 | <i>cela1 (2 of 2)</i>   | chymotrypsin-like elastase family, member 1                                                                                    | Ensembl_nile_tilapia | -        | down  | 1.77E-03 | down  | -        | 0.0   | -        | 0.0  |
| ENSDARG00000090428 | <i>ctrb1</i>            | chymotrypsinogen B1                                                                                                            | Ensembl_zebrafish    | -        | 0.0   | 1.35E-07 | -46.7 | -        | 0.0   | -        | down |
| ENSGACG00000000480 | <i>cotl1</i>            | coactosin-like 1 (Dictyostelium)                                                                                               | Ensembl_stickleback  | -        | down  | 3.04E-04 | down  | 5.65E-02 | up    | -        | down |
| ENSORLG00000013399 | <i>f5</i>               | coagulation factor V (proaccelerin, labile factor)                                                                             | Ensembl_medaka       | -        | down  | -        | 0.0   | 6.99E-02 | up    | -        | -1.3 |
| ENSGACG00000014046 | <i>cc2d2a (1 of 2)</i>  | coiled-coil and C2 domain containing 2A                                                                                        | Ensembl_stickleback  | -        | -1.3  | -        | -2.9  | 5.66E-03 | up    | -        | down |
| ENSDARG00000028524 | <i>col5a3b</i>          | collagen, type V, alpha 3b                                                                                                     | Ensembl_zebrafish    | -        | -14.4 | -        | up    | 5.65E-02 | down  | -        | 0.0  |
| 213515210          | NP_001134256.1          | complement C1q-like protein 2                                                                                                  | Refseq_proteins      | 4.90E-02 | 19.0  | -        | 1.5   | 1.47E-02 | -17.8 | -        | -1.0 |
| ENSONIG00000016437 | <i>c3 (4 of 4)</i>      | complement component 3                                                                                                         | Ensembl_nile_tilapia | -        | down  | 1.27E-05 | down  | -        | -1.4  | -        | -1.8 |
| ENSGACG00000011303 | <i>coro7</i>            | coronin 7                                                                                                                      | Ensembl_stickleback  | -        | -1.9  | -        | 1.4   | 3.24E-03 | down  | -        | up   |
| CR371595           | emb CR371595.2          | CR371595 AGENAE Rainbow trout normalized testis library (tcbi) Oncorhynchus mykiss cDNA clone tcbi0031.o.10 5', mRNA sequence. | EST_others           | -        | up    | -        | 3.5   | 4.49E-02 | up    | -        | up   |
| CR373403           | emb CR373403.2          | CR373403 AGENAE Rainbow trout normalized testis library (tcbi) Oncorhynchus mykiss cDNA clone tcbi0023.m.23 5', mRNA sequence. | EST_others           | 1.36E-02 | up    | -        | -7.2  | -        | -2.3  | -        | down |
| ENSONIG00000020925 | <i>crebzf</i>           | CREB/ATF bZIP transcription factor                                                                                             | Ensembl_nile_tilapia | 9.89E-02 | 10.6  | -        | 1.3   | -        | 1.5   | -        | 4.1  |
| 113671701          | NP_001038787.1          | crumbs homolog 3a precursor                                                                                                    | Refseq_proteins      | -        | 3.7   | -        | -2.2  | 1.96E-02 | up    | -        | -4.6 |
| ENSGACG00000006281 | <i>ctdSpl2 (1 of 2)</i> | CTD (carboxy-terminal domain, RNA polymerase II, polypeptide A) small phosphatase like 2                                       | Ensembl_stickleback  | -        | -1.4  | -        | -1.2  | 4.49E-02 | down  | -        | up   |
| CU069447           | emb CU069447.1          | CU069447 AGENAE Rainbow trout multi-tissues library (tcce) Oncorhynchus mykiss cDNA clone tcay0022.o.06 3', mRNA sequence.     | EST_others           | -        | 0.0   | -        | 0.0   | -        | down  | 4.78E-02 | down |
| ENSGACG00000008425 | <i>cuedc2</i>           | CUE domain containing 2                                                                                                        | Ensembl_stickleback  | 1.11E-07 | 200.3 | -        | 0.0   | -        | down  | -        | 7.0  |
| ENSONIG00000003295 | <i>cdk18</i>            | cyclin-dependent kinase 18                                                                                                     | Ensembl_nile_tilapia | -        | -2.1  | -        | 0.0   | 6.99E-02 | down  | -        | 0.0  |
| 375196821          | JN739111.1              | Cyprinus carpio clone 409854 microsatellite sequence                                                                           | nt                   | -        | -1.8  | 6.22E-03 | down  | -        | -1.8  | -        | down |
| ENSGACG00000009382 | <i>cth</i>              | cystathionase (cystathionine gamma-lyase)                                                                                      | Ensembl_stickleback  | -        | -5.9  | -        | 1.1   | 2.57E-04 | -19.4 | -        | 1.0  |

|                    |                        |                                                                         |                      |          |       |          |       |          |       |          |       |
|--------------------|------------------------|-------------------------------------------------------------------------|----------------------|----------|-------|----------|-------|----------|-------|----------|-------|
| ENSONIG0000001633  | <i>cox4i2</i>          | cytochrome c oxidase subunit IV isoform 2 (lung)                        | Ensembl_nile_tilapia | 9.61E-03 | down  | -        | -2.1  | -        | 1.8   | 4.61E-02 | 6.3   |
| ENSONIG0000001074  | <i>cyp46a1</i>         | cytochrome P450, family 46, subfamily A, polypeptide 1                  | Ensembl_nile_tilapia | 4.68E-03 | up    | -        | 2.8   | 5.78E-03 | 10.2  | -        | -1.2  |
| ENSGACG00000017414 | <i>cyp8b1</i>          | cytochrome P450, family 8, subfamily B, polypeptide 1                   | Ensembl_stickleback  | -        | -3.1  | -        | 0.0   | -        | up    | 8.31E-05 | -36.4 |
| ENSDARG00000053068 | <i>cyp8b1</i>          | cytochrome P450, family 8, subfamily B, polypeptide 1                   | Ensembl_zebrafish    | -        | 0.0   | 1.87E-02 | 12.8  | -        | 1.1   | -        | -1.2  |
| ENSGACG00000011632 | <i>cyth3 (1 of 2)</i>  | cytohesin 3                                                             | Ensembl_stickleback  | -        | -4.0  | -        | -4.4  | 6.86E-02 | -6.2  | -        | -3.1  |
| ENSGACG00000008861 | <i>dao</i>             | D-amino-acid oxidase                                                    | Ensembl_stickleback  | -        | 0.0   | 9.01E-02 | down  | -        | down  | -        | down  |
| 41055872           | NM_200993.1            | Danio rerio zgc:55733 (zgc:55733), mRNA                                 | Refseq_genes         | -        | -3.2  | -        | -1.4  | -        | 1.5   | 2.11E-07 | up    |
| ENSGACG00000016060 | <i>ddx21</i>           | DEAD (Asp-Glu-Ala-Asp) box helicase 21                                  | Ensembl_stickleback  | -        | -16.6 | -        | -3.8  | -        | -1.9  | 1.37E-03 | down  |
| ENSGACG00000010201 | <i>dapk2 (2 of 2)</i>  | death-associated protein kinase 2                                       | Ensembl_stickleback  | 3.13E-08 | down  | -        | 0.0   | -        | 0.0   | -        | down  |
| ENSGACG0000001844  | <i>daxx</i>            | death-domain associated protein                                         | Ensembl_stickleback  | 2.42E-03 | down  | -        | down  | -        | 2.1   | -        | -1.8  |
| ENSGACG00000018923 | <i>dock4</i>           | dedicator of cytokinesis 4                                              | Ensembl_stickleback  | -        | 1.4   | -        | 1.3   | -        | 1.1   | 6.43E-04 | -11.7 |
| ENSGACG00000002377 | <i>dhrs7c (2 of 2)</i> | dehydrogenase/reductase (SDR family) member 7C                          | Ensembl_stickleback  | -        | down  | -        | down  | 1.04E-02 | down  | -        | 0.0   |
| ENSGACG00000008597 | <i>degs2</i>           | delta(4)-desaturase, sphingolipid 2                                     | Ensembl_stickleback  | -        | 1.2   | -        | 5.1   | 7.29E-04 | 11.5  | -        | 2.9   |
| ENSGACG00000019427 | <i>dtx4 (1 of 2)</i>   | deltex homolog 4 (Drosophila)                                           | Ensembl_stickleback  | -        | -1.8  | -        | 1.1   | 2.43E-02 | down  | -        | down  |
| ENSGACG00000005878 | <i>dnase1</i>          | deoxyribonuclease I                                                     | Ensembl_stickleback  | -        | 0.00  | 1.26E-07 | down  | -        | 0.0   | -        | down  |
| ENSGACG00000015594 | <i>dda1 (2 of 2)</i>   | DET1 and DDB1 associated 1                                              | Ensembl_stickleback  | -        | down  | -        | -1.8  | 1.28E-02 | down  | -        | -4.4  |
| ENSGACG00000018166 | <i>dpysl2 (1 of 2)</i> | dihydropyrimidinase-like 2                                              | Ensembl_stickleback  | -        | -6.8  | 6.40E-02 | -24.7 | 4.39E-02 | -30.3 | -        | -4.3  |
| ENSGACG00000006240 | <i>dip2a</i>           | DIP2 disco-interacting protein 2 homolog A (Drosophila)                 | Ensembl_stickleback  | -        | -5.3  | -        | -3.2  | 1.22E-03 | down  | 5.14E-04 | -28.6 |
| ENSGACG00000000671 | <i>dip2b (2 of 2)</i>  | DIP2 disco-interacting protein 2 homolog B (Drosophila)                 | Ensembl_stickleback  | -        | -2.2  | -        | -1.6  | -        | -3.1  | 2.80E-03 | -16.8 |
| 19171735           | AF382036.1             | Discocotyle sagittata 28S large subunit ribosomal RNA, partial sequence | nt                   | 8.88E-02 | 27.2  | -        | up    | -        | 1.4   | -        | -1.1  |
| ENSDARG00000062177 | <i>dcbl2</i>           | discoidin, CUB and LCCL domain containing 2                             | Ensembl_zebrafish    | 4.69E-02 | up    | -        | up    | 4.49E-02 | up    | -        | down  |
| ENSORLG00000011807 | <i>dcbl2</i>           | discoidin, CUB and LCCL domain containing 2                             | Ensembl_medaka       | 6.54E-03 | down  | -        | -1.2  | 3.65E-02 | down  | -        | 1.0   |
| ENSDARG00000041110 | <i>dnajc3</i>          | DnaJ (Hsp40) homolog, subfamily C, member 3                             | Ensembl_zebrafish    | -        | 2.7   | -        | 2.6   | -        | 1.5   | 1.13E-02 | 9.1   |
| ENSGACG00000016454 | <i>dusp22 (1 of 2)</i> | dual specificity phosphatase 22                                         | Ensembl_stickleback  | -        | 0.00  | -        | down  | 2.28E-03 | down  | -        | down  |
| ENSGACG00000003355 | <i>dynlt3 (1 of 2)</i> | dynein, light chain, Tctex-type 3                                       | Ensembl_stickleback  | 9.28E-02 | down  | -        | down  | -        | 1.6   | -        | up    |
| ENSORLG00000002091 | <i>elf2</i>            | E74-like factor 2 (ets domain transcription factor)                     | Ensembl_medaka       | 5.65E-03 | down  | -        | -2.7  | -        | -3.1  | -        | 1.8   |
| ENSGACG00000003978 | <i>egfl6</i>           | EGF-like-domain, multiple 6                                             | Ensembl_stickleback  | -        | down  | 2.87E-03 | down  | 4.39E-02 | -28.0 | -        | 0.0   |
| ENSGACG00000015896 | <i>egfl8</i>           | EGF-like-domain, multiple 8                                             | Ensembl_stickleback  | -        | down  | -        | -2.8  | 5.65E-02 | down  | -        | 0.0   |

|                    |                        |                                                                                                                   |                      |          |        |          |        |          |       |          |       |
|--------------------|------------------------|-------------------------------------------------------------------------------------------------------------------|----------------------|----------|--------|----------|--------|----------|-------|----------|-------|
| ENSDARG00000056744 | <i>ela2</i>            | elastase 2                                                                                                        | Ensembl_zebrafish    | -        | 0.00   | 3.21E-07 | -30.7  | -        | 0.0   | -        | down  |
| ENSDARG0000007276  | <i>ela3l</i>           | elastase 3 like                                                                                                   | Ensembl_zebrafish    | -        | 0.00   | 1.10E-07 | -46.4  | -        | 0.0   | -        | down  |
| ENSDARG00000045639 | <i>elavl4</i>          | ELAV (embryonic lethal, abnormal vision, Drosophila)-like 4 (Hu antigen D)                                        | Ensembl_zebrafish    | -        | up     | -        | 0.0    | -        | up    | 9.95E-02 | up    |
| ENSGACG00000014563 | <i>eaf2</i>            | ELL associated factor 2                                                                                           | Ensembl_stickleback  | -        | 0.00   | 9.01E-02 | down   | -        | 0.0   | -        | 0.0   |
| ENSDARG00000004979 | <i>elovl5</i>          | ELOVL family member 5, elongation of long chain fatty acids (yeast)                                               | Ensembl_zebrafish    | -        | 1.5    | -        | 1.4    | -        | -1.3  | 3.47E-03 | 8.4   |
| ENSORLG00000020058 | <i>endou</i>           | endonuclease, polyU-specific                                                                                      | Ensembl_medaka       | -        | 0.00   | 1.52E-06 | -39.3  | -        | 0.0   | -        | 3.7   |
| ENSGACG00000005596 | <i>erlec1</i>          | endoplasmic reticulum lectin 1                                                                                    | Ensembl_stickleback  | -        | -1.1   | -        | 3.7    | 3.18E-04 | up    | -        | 1.3   |
| 269860691          | XM_002650019.1         | Enterocytozoon bienewisi H348 tubulin alpha chain (EBI_21799) mRNA, complete cds                                  | nt                   | 7.32E-02 | up     | -        | 0.0    | -        | 0.0   | -        | 0.0   |
| ENSGACG00000009051 | <i>ephb3 (1 of 2)</i>  | EPH receptor B3                                                                                                   | Ensembl_stickleback  | -        | 4.0    | 4.13E-02 | 12.6   | -        | 4.0   | -        | 1.5   |
| 238817522          | FJ443041.1             | Ephemerella cornutus 16S ribosomal RNA gene, partial sequence; mitochondrial                                      | nt                   | -        | 0.00   | 1.08E-03 | up     | -        | 0.0   | -        | 0.0   |
| ENSGACG00000002632 | <i>epcam</i>           | epithelial cell adhesion molecule                                                                                 | Ensembl_stickleback  | -        | -1.2   | 3.54E-02 | down   | 8.30E-03 | down  | -        | up    |
| ENSONIG00000019196 | <i>ect2</i>            | epithelial cell transforming sequence 2 oncogene                                                                  | Ensembl_nile_tilapia | -        | 0.00   | -        | up     | 3.02E-02 | down  | -        | 1.6   |
| 225715605          | BT079225.1             | Esox lucius clone eluc-evq-516-169 Probable pancreatic secretory proteinase inhibitor putative mRNA, complete cds | nt                   | -        | 0.00   | 2.53E-03 | -18.3  | -        | up    | -        | down  |
| 225716561          | BT079703.1             | Esox lucius clone eluc-evq-517-294 Fucolectin-4 precursor putative mRNA, complete cds                             | nt                   | -        | 0.00   | -        | 1.2    | -        | 0.0   | 2.72E-05 | -25.6 |
| 225716185          | BT079515.1             | Esox lucius clone eluc-evq-538-320 Apolipoprotein O precursor putative mRNA, complete cds                         | nt                   | -        | up     | -        | 0.0    | 9.52E-06 | down  | -        | 0.0   |
| ENSDARG00000004111 | <i>esr1</i>            | estrogen receptor 1                                                                                               | Ensembl_zebrafish    | -        | 0.00   | -        | up     | -        | 2.9   | 1.19E-10 | 105.2 |
| ENSG00000156508    | <i>eef1a1</i>          | eukaryotic translation elongation factor 1 alpha 1                                                                | Ensembl_human        | 8.70E-06 | up     | -        | 0.0    | -        | 0.0   | -        | 0.0   |
| ENSGACG00000008569 | <i>eif2s1</i>          | eukaryotic translation initiation factor 2, subunit 1 alpha, 35kDa                                                | Ensembl_stickleback  | -        | 0.00   | 1.32E-10 | -454.3 | -        | 2.2   | -        | -1.1  |
| ENSGACG00000013800 | <i>eif2b3</i>          | eukaryotic translation initiation factor 2B, subunit 3 gamma, 58kDa                                               | Ensembl_stickleback  | 2.14E-08 | up     | -        | down   | -        | down  | -        | 0.0   |
| ENSGACG00000004504 | <i>eif4h</i>           | eukaryotic translation initiation factor 4H                                                                       | Ensembl_stickleback  | -        | 0.00   | 1.84E-02 | down   | -        | -1.7  | -        | up    |
| ENSGACG00000009227 | <i>esyt1 (2 of 2)</i>  | extended synaptotagmin-like protein 1                                                                             | Ensembl_stickleback  | -        | -1.9   | -        | -4.7   | 6.46E-05 | -19.0 | -        | -1.2  |
| ENSGACG00000018094 | <i>fam129b</i>         | family with sequence similarity 129, member B                                                                     | Ensembl_stickleback  | 8.82E-07 | -132.5 | -        | up     | -        | up    | -        | down  |
| ENSDARG00000074317 | <i>fam20c (2 of 2)</i> | family with sequence similarity 20, member C                                                                      | Ensembl_zebrafish    | -        | 1.6    | -        | 1.5    | -        | 0.0   | 1.36E-04 | 40.3  |
| ENSGACG00000003212 | <i>fam204a</i>         | family with sequence similarity 204, member A                                                                     | Ensembl_stickleback  | 4.90E-02 | 16.0   | -        | up     | -        | 0.0   | -        | 0.0   |
| ENSGACG00000019804 | <i>fam3c</i>           | family with sequence similarity 3, member C                                                                       | Ensembl_stickleback  | 3.75E-02 | down   | -        | -1.1   | -        | 2.1   | -        | 1.2   |
| ENSDARG00000010437 | <i>fam46c</i>          | family with sequence similarity 46, member C                                                                      | Ensembl_zebrafish    | -        | -4.2   | -        | 1.2    | -        | -1.9  | 2.05E-02 | 11.1  |

|                     |                        |                                                                    |                     |          |      |          |       |          |       |          |       |
|---------------------|------------------------|--------------------------------------------------------------------|---------------------|----------|------|----------|-------|----------|-------|----------|-------|
| ENSGACG0000004704   | <i>fam65b</i>          | family with sequence similarity 65, member B                       | Ensembl_stickleback | -        | -2.0 | -        | down  | 2.47E-02 | -6.6  | -        | up    |
| ENSGACG0000007029   | <i>fancc</i>           | Fanconi anemia, complementation group C                            | Ensembl_stickleback | 5.86E-02 | down | -        | down  | 2.85E-09 | down  | -        | down  |
| ENSDARG00000038439  | <i>fabp10a</i>         | fatty acid binding protein 10a, liver basic                        | Ensembl_zebrafish   | -        | -1.7 | 5.44E-02 | -25.7 | -        | -1.4  | -        | -1.8  |
| ENSGACG00000010321  | <i>fnb3</i>            | fibrillin 3                                                        | Ensembl_stickleback | -        | -1.4 | -        | -1.2  | 8.06E-02 | -5.2  | -        | -4.3  |
| ENSDARG00000008969  | <i>fgb</i>             | fibrinogen, B beta polypeptide                                     | Ensembl_zebrafish   | -        | 4.7  | 2.66E-02 | -30.1 | -        | 2.9   | -        | -2.0  |
| ENSDARG00000037281  | <i>fgg</i>             | fibrinogen, gamma polypeptide                                      | Ensembl_zebrafish   | -        | -1.3 | 1.70E-02 | -19.4 | -        | down  | -        | -1.7  |
| ENSORLG00000001333  | <i>fscb</i>            | fibrous sheath CABYR binding protein                               | Ensembl_medaka      | -        | -2.0 | 7.81E-02 | -6.9  | 5.97E-02 | -8.5  | 1.96E-02 | -15.5 |
| ENSGACG00000013103  | <i>flna (2 of 2)</i>   | filamin A, alpha                                                   | Ensembl_stickleback | -        | 1.3  | 7.08E-02 | -5.6  | -        | -3.9  | -        | 2.0   |
| 301069358           | NP_571346.2            | forkhead box D1                                                    | Refseq_proteins     | -        | down | 2.45E-03 | up    | -        | 2.0   | -        | 0.0   |
| ENSGACG00000017029  | <i>foxo4</i>           | forkhead box O4                                                    | Ensembl_stickleback | -        | -1.0 | -        | -2.0  | 1.02E-04 | -27.6 | -        | down  |
| ENSGACG00000007994  | <i>fhod3 (1 of 2)</i>  | formin homology 2 domain containing 3                              | Ensembl_stickleback | -        | 0.00 | -        | down  | 3.67E-05 | down  | -        | 0.0   |
| ENSGACG00000014208  | <i>fmnl1 (2 of 2)</i>  | formin-like 1                                                      | Ensembl_stickleback | -        | -1.1 | -        | -1.3  | 3.17E-02 | -8.2  | -        | down  |
| ENSGACG00000010242  | <i>fhf5</i>            | four and a half LIM domains 5                                      | Ensembl_stickleback | -        | down | -        | down  | 3.90E-03 | down  | -        | 0.0   |
| ENSGACG00000018742  | <i>fmr1</i>            | fragile X mental retardation 1                                     | Ensembl_stickleback | -        | up   | 2.45E-03 | up    | -        | up    | -        | 0.0   |
| ENSDARG000000089165 | <i>fut9 (14 of 16)</i> | fucosyltransferase 9 (alpha (1,3) fucosyltransferase)              | Ensembl_zebrafish   | -        | -1.2 | -        | 1.9   | 8.81E-02 | 14.8  | -        | up    |
| ENSGACG00000011403  | <i>fh</i>              | fumarate hydratase                                                 | Ensembl_stickleback | -        | -1.5 | 9.01E-02 | down  | -        | -1.7  | -        | down  |
| ENSORLG00000013751  | <i>fundc1</i>          | FUN14 domain containing 1                                          | Ensembl_medaka      | 4.69E-02 | down | -        | 1.4   | 6.99E-02 | down  | 5.91E-02 | down  |
| ENSGACG00000009962  | <i>gabpb2</i>          | GA binding protein transcription factor, beta subunit 2            | Ensembl_stickleback | 9.28E-02 | down | -        | -1.8  | -        | -2.1  | -        | -1.2  |
| 112419938           | BT026755.1             | Gasterosteus aculeatus clone CFW26-C06 mRNA sequence               | nt                  | -        | -1.0 | -        | -6.3  | 6.60E-02 | -8.2  | -        | up    |
| 112420062           | BT026879.1             | Gasterosteus aculeatus clone CFW80-B01 mRNA sequence               | nt                  | -        | 0.00 | -        | 0.0   | -        | 0.0   | 1.46E-03 | -11.1 |
| 112420848           | BT027665.1             | Gasterosteus aculeatus clone CGX78-D04 mRNA sequence               | nt                  | -        | -1.1 | -        | -4.1  | 2.28E-03 | up    | -        | up    |
| ENSORLG00000000978  | <i>gatsl3</i>          | GATS protein-like 3                                                | Ensembl_medaka      | -        | down | -        | 1.3   | 8.81E-02 | 11.9  | -        | 1.0   |
| ENSORLG00000020655  | <i>gle1</i>            | GLE1 RNA export mediator homolog (yeast)                           | Ensembl_medaka      | -        | 2.0  | -        | down  | 8.79E-02 | down  | -        | -2.1  |
| ENSGACG00000005766  | <i>gltscr2</i>         | glioma tumor suppressor candidate region gene 2                    | Ensembl_stickleback | -        | -1.7 | -        | 0.0   | 6.99E-02 | down  | -        | down  |
| ENSORLG00000002010  | <i>gck</i>             | glucokinase (hexokinase 4)                                         | Ensembl_medaka      | -        | 0.00 | -        | 0.0   | -        | 0.0   | 1.87E-02 | up    |
| ENSDARG00000068006  | <i>gck</i>             | glucokinase (hexokinase 4, maturity onset diabetes of the young 2) | Ensembl_zebrafish   | -        | 0.00 | -        | down  | -        | 0.0   | 4.94E-08 | 42.9  |
| ENSGACG00000011182  | <i>gclm</i>            | glutamate-cysteine ligase, modifier subunit                        | Ensembl_stickleback | -        | 1.2  | -        | -2.0  | 3.02E-02 | down  | -        | up    |
| ENSGACG00000006959  | <i>qpct</i>            | glutaminyl-peptide cyclotransferase                                | Ensembl_stickleback | -        | down | -        | 4.9   | 6.71E-03 | -11.0 | -        | -1.7  |

|                    |                        |                                                                                          |                      |          |       |          |       |          |       |          |       |
|--------------------|------------------------|------------------------------------------------------------------------------------------|----------------------|----------|-------|----------|-------|----------|-------|----------|-------|
| ENSGACG0000005698  | <i>gnmt</i>            | glycine N-methyltransferase                                                              | Ensembl_stickleback  | -        | -3.3  | -        | -5.3  | -        | -1.2  | 5.17E-05 | -23.2 |
| ENSDARG00000036239 | <i>gatm</i>            | glycine amidinotransferase (L-arginine:glycine amidinotransferase)                       | Ensembl_zebrafish    | -        | 0.00  | -        | 1.1   | 3.24E-03 | down  | -        | 0.0   |
| ENSGACG00000009501 | <i>grhl3</i>           | grainyhead-like 3 (Drosophila)                                                           | Ensembl_stickleback  | -        | up    | -        | up    | 2.75E-04 | up    | -        | up    |
| ENSGACG00000006103 | <i>grem1</i>           | gremlin 1                                                                                | Ensembl_stickleback  | -        | down  | 1.84E-02 | up    | -        | up    | -        | -1.1  |
| ENSGACG00000020233 | <i>hspb1</i>           | heat shock 27kDa protein 1                                                               | Ensembl_stickleback  | -        | 1.2   | 5.59E-02 | down  | -        | -2.2  | -        | 2.2   |
| ENSDARG00000092362 | <i>hsp70.2</i>         | heat shock cognate 70-kd protein, tandem duplicate 2                                     | Ensembl_zebrafish    | 5.91E-03 | 8.9   | 1.93E-02 | 7.3   | -        | 1.6   | -        | -1.3  |
| ENSGACG00000011278 | <i>hectd4 (1 of 2)</i> | HECT domain containing E3 ubiquitin protein ligase 4                                     | Ensembl_stickleback  | -        | -1.4  | -        | -1.0  | -        | -1.8  | 3.09E-02 | -6.3  |
| ENSGACG00000003389 | <i>hhat1 (2 of 2)</i>  | hedgehog acyltransferase-like                                                            | Ensembl_stickleback  | 4.69E-02 | down  | -        | 0.0   | 2.51E-07 | down  | -        | 0.0   |
| ENSGACG00000012795 | <i>hhat1 (1 of 2)</i>  | hedgehog acyltransferase-like                                                            | Ensembl_stickleback  | -        | 0.00  | -        | 0.0   | 2.43E-02 | down  | -        | 0.0   |
| ENSONIG00000012532 | <i>helq</i>            | helicase, POLQ-like                                                                      | Ensembl_nile_tilapia | 9.28E-02 | down  | -        | 0.0   | -        | -1.1  | -        | down  |
| ENSGACG00000010755 | <i>hltf</i>            | helicase-like transcription factor                                                       | Ensembl_stickleback  | -        | -2.0  | -        | -2.8  | 2.75E-04 | down  | -        | -2.9  |
| ENSDARG00000012609 | <i>hpx</i>             | hemopexin                                                                                | Ensembl_zebrafish    | -        | -2.3  | 3.33E-02 | -12.0 | -        | -1.5  | -        | -1.5  |
| ENSONIG00000017473 | <i>hlcs</i>            | holocarboxylase synthetase (biotin-(propionyl-CoA-carboxylase (ATP-hydrolysing)) ligase) | Ensembl_nile_tilapia | 1.61E-02 | down  | -        | 0.0   | -        | -1.6  | -        | -1.2  |
| ENSGACG00000009401 | <i>hoxc8</i>           | homeobox C8                                                                              | Ensembl_stickleback  | 9.37E-03 | -35.8 | -        | -1.5  | 3.65E-02 | -31.3 | -        | down  |
| ENSGACG00000010338 | <i>htra1 (1 of 2)</i>  | HtrA serine peptidase 1                                                                  | Ensembl_stickleback  | 1.45E-07 | 127.2 | -        | down  | -        | down  | -        | 0.0   |
| ENSORLG00000013140 | <i>habp2</i>           | hyaluronan binding protein 2                                                             | Ensembl_medaka       | -        | down  | 4.41E-02 | down  | -        | 0.0   | -        | -1.8  |
| ENSGACG00000013673 | <i>hsd3b7</i>          | hydroxy-delta-5-steroid dehydrogenase, 3 beta- and steroid delta-isomerase 7             | Ensembl_stickleback  | -        | -2.1  | -        | 1.0   | 9.50E-02 | 4.9   | 2.33E-02 | -7.8  |
| 260783280          | XP_002586704.1         | hypothetical protein BRAFLDRAFT_77465                                                    | Refseq_proteins      | -        | -1.5  | -        | up    | 9.04E-04 | down  | -        | 0.0   |
| 156308441          | XP_001617664.1         | hypothetical protein NEMVEDRAFT_v1g69851                                                 | nr                   | 1.25E-07 | up    | -        | 0.0   | -        | 0.0   | -        | 0.0   |
| ENSDARG00000096430 | <i>ighv9-1</i>         | immunoglobulin heavy variable 9-1                                                        | Ensembl_zebrafish    | 9.28E-02 | down  | -        | 0.0   | -        | 2.6   | -        | down  |
| ENSONIG00000008551 | <i>ino80d</i>          | INO80 complex subunit D                                                                  | Ensembl_nile_tilapia | -        | -2.9  | -        | -3.4  | 3.24E-02 | -6.7  | -        | -1.3  |
| ENSDARG00000011909 | <i>itpr2</i>           | inositol 1,4,5-triphosphate receptor, type 2                                             | Ensembl_zebrafish    | -        | -1.1  | -        | 1.8   | 8.78E-02 | 17.4  | -        | -2.7  |
| ENSGACG00000000831 | <i>ip6k2 (1 of 2)</i>  | inositol hexakisphosphate kinase 2                                                       | Ensembl_stickleback  | 7.33E-03 | 8.7   | 1.51E-02 | 6.7   | -        | 2.2   | 1.15E-02 | 7.4   |
| ENSGACG00000015412 | <i>ipmk</i>            | inositol polyphosphate multikinase                                                       | Ensembl_stickleback  | -        | down  | -        | 12.9  | 1.70E-04 | down  | -        | 1.2   |
| ENSDARG00000014947 | <i>igfbp1a</i>         | insulin-like growth factor binding protein 1a                                            | Ensembl_zebrafish    | -        | -1.3  | -        | -1.3  | 5.65E-02 | up    | -        | -2.2  |
| ENSDARG00000038666 | <i>igfbp1b</i>         | insulin-like growth factor binding protein 1b                                            | Ensembl_zebrafish    | -        | 0.00  | -        | down  | -        | down  | 5.91E-02 | -5.4  |
| ENSGACG00000002508 | <i>igfbp5 (1 of 2)</i> | insulin-like growth factor binding protein 5                                             | Ensembl_stickleback  | -        | 1.1   | -        | 0.0   | -        | -1.1  | 2.94E-02 | up    |
| ENSDARG00000034043 | <i>irx5a</i>           | iroquois homeobox protein 5a                                                             | Ensembl_zebrafish    | -        | 0.00  | -        | 0.0   | 8.79E-02 | down  | -        | 0.0   |
| ENSGACG00000011519 | <i>jph2</i>            | junctionophilin 2                                                                        | Ensembl_stickleback  | -        | up    | -        | 1.0   | -        | -2.8  | 4.60E-03 | 14.4  |



|                    |                        |                                                                                                       |                      |          |       |          |      |          |      |          |      |
|--------------------|------------------------|-------------------------------------------------------------------------------------------------------|----------------------|----------|-------|----------|------|----------|------|----------|------|
| ENSGACG00000009872 | <i>kat7 (1 of 2)</i>   | K(lysine) acetyltransferase 7                                                                         | Ensembl_stickleback  | -        | -1.6  | -        | 2.0  | 3.65E-02 | down | -        | 0.0  |
| ENSORLG00000011216 | <i>kansl3</i>          | KAT8 regulatory NSL complex subunit 3                                                                 | Ensembl_medaka       | -        | down  | -        | down | -        | -3.1 | 5.91E-02 | down |
| ENSDARG00000015815 | <i>kdr1</i>            | kinase insert domain receptor like                                                                    | Ensembl_zebrafish    | -        | 1.4   | -        | 1.5  | 4.39E-02 | 21.0 | -        | -1.4 |
| ENSGACG00000011649 | <i>lace1 (1 of 2)</i>  | lactation elevated 1                                                                                  | Ensembl_stickleback  | -        | 0.00  | -        | 0.0  | -        | 0.0  | 1.70E-04 | up   |
| ENSONIG00000014788 | <i>lrig2</i>           | leucine-rich repeats and immunoglobulin-like domains 2                                                | Ensembl_nile_tilapia | -        | 1.4   | 1.49E-02 | up   | 1.50E-04 | up   | -        | -1.1 |
| ENSGACG00000000675 | <i>lta4h</i>           | leukotriene A4 hydrolase                                                                              | Ensembl_stickleback  | -        | 0.00  | -        | up   | 3.67E-05 | down | -        | up   |
| ENSGACG00000008716 | <i>limk2</i>           | LIM domain kinase 2                                                                                   | Ensembl_stickleback  | -        | -2.3  | -        | 1.8  | 3.11E-02 | 22.4 | -        | 2.6  |
| ENSGACG00000005614 | <i>lmf1</i>            | lipase maturation factor 1                                                                            | Ensembl_stickleback  | -        | 1.6   | 4.56E-06 | down | -        | 1.2  | -        | -1.6 |
| ENSGACG00000019500 | <i>ldlr (2 of 2)</i>   | low density lipoprotein receptor                                                                      | Ensembl_stickleback  | -        | up    | 4.41E-02 | down | -        | -4.8 | -        | down |
| ENSGACG00000011854 | <i>kdm2b (2 of 2)</i>  | lysine (K)-specific demethylase 2B                                                                    | Ensembl_stickleback  | -        | -2.4  | -        | -2.2 | 1.34E-04 | down | -        | down |
| ENSDARG00000013542 | <i>lpgat1</i>          | lysophosphatidylglycerol acyltransferase 1                                                            | Ensembl_zebrafish    | -        | -3.4  | -        | 1.5  | -        | up   | 5.61E-03 | up   |
| ENSGACG00000018078 | <i>man1b1 (1 of 2)</i> | mannosidase, alpha, class 1B, member 1                                                                | Ensembl_stickleback  | -        | -1.5  | -        | -2.4 | 6.99E-02 | down | -        | 1.3  |
| ENSGACG00000013607 | <i>man1c1</i>          | mannosidase, alpha, class 1C, member 1                                                                | Ensembl_stickleback  | -        | 1.1   | 9.01E-02 | down | -        | 1.5  | 7.68E-02 | up   |
| ENSDARG00000042816 | <i>mmp9</i>            | matrix metalloproteinase 9                                                                            | Ensembl_zebrafish    | -        | -1.7  | -        | -1.5 | 1.41E-02 | -6.6 | -        | -2.2 |
| ENSDARG00000060808 | <i>mecom</i>           | MDS1 and EVI1 complex locus                                                                           | Ensembl_zebrafish    | 3.75E-02 | -27.0 | -        | 1.0  | -        | up   | -        | -1.1 |
| ENSGACG00000012999 | <i>mep1b (1 of 2)</i>  | meprin A, beta                                                                                        | Ensembl_stickleback  | -        | down  | -        | down | 9.04E-04 | down | -        | down |
| ENSGACG00000015955 | <i>mthfsd</i>          | methylenetetrahydrofolate synthetase domain containing                                                | Ensembl_stickleback  | -        | -1.5  | -        | 2.9  | 8.79E-02 | down | -        | up   |
| ENSDARG00000090044 | <i>mthfd2</i>          | methylenetetrahydrofolate dehydrogenase (NADP+ dependent) 2, methylenetetrahydrofolate cyclohydrolase | Ensembl_zebrafish    | -        | 2.1   | -        | 1.4  | -        | 1.4  | 1.19E-02 | up   |
| ENSDARG00000053087 | <i>mthfr</i>           | methylenetetrahydrofolate reductase (NAD(P)H)                                                         | Ensembl_zebrafish    | -        | 1.2   | -        | -1.7 | -        | 1.2  | 2.69E-02 | 28.0 |
| ENSGACG00000016984 | <i>msmo1</i>           | methylsterol monooxygenase 1                                                                          | Ensembl_stickleback  | -        | 0.00  | 3.54E-02 | up   | -        | down | -        | up   |
| ENSGACG00000005096 | <i>mettl5</i>          | methyltransferase like 5                                                                              | Ensembl_stickleback  | -        | -1.1  | -        | -2.2 | 8.04E-02 | -4.8 | -        | -1.1 |
| ENSGACG00000006537 | <i>mcph1</i>           | microcephalin 1                                                                                       | Ensembl_stickleback  | -        | 1.5   | -        | down | 1.28E-02 | down | -        | -2.6 |
| ENSONIG00000009665 | <i>mcph1</i>           | microcephalin 1                                                                                       | Ensembl_nile_tilapia | -        | 0.00  | 9.01E-02 | down | -        | -6.6 | -        | 0.0  |
| ENSONIG00000000210 | <i>mfap4 (8 of 9)</i>  | microfibrillar-associated protein 4                                                                   | Ensembl_nile_tilapia | -        | 0.00  | 1.49E-02 | -9.0 | -        | 0.0  | -        | 0.0  |
| ENSGACG00000010541 | <i>mrpl12</i>          | mitochondrial ribosomal protein L12                                                                   | Ensembl_stickleback  | -        | 5.4   | -        | 1.4  | 6.99E-02 | down | -        | -2.2 |
| ENSGACG00000002919 | <i>mrpl30</i>          | mitochondrial ribosomal protein L30                                                                   | Ensembl_stickleback  | -        | up    | -        | -3.0 | 1.07E-03 | down | -        | down |
| ENSGACG00000013019 | <i>mapk8ip3</i>        | mitogen-activated protein kinase 8 interacting protein 3                                              | Ensembl_stickleback  | 7.43E-04 | 65.8  | -        | 2.5  | -        | -2.5 | -        | 4.6  |
| 159490             | M28397.1               | MOTARYBB Tobacco hornworm (M.sexta) arylphorin beta subunit mRNA, complete cds                        | nt                   | -        | 0.00  | 2.00E-05 | up   | -        | up   | -        | 0.0  |

|                    |                        |                                                                           |                      |          |        |          |       |          |       |          |       |
|--------------------|------------------------|---------------------------------------------------------------------------|----------------------|----------|--------|----------|-------|----------|-------|----------|-------|
| ENSGACG0000009336  | <i>mre11a</i>          | MRE11 meiotic recombination 11 homolog A (S. cerevisiae)                  | Ensembl_stickleback  | 7.32E-02 | up     | -        | 2.3   | 6.84E-03 | up    | -        | 1.1   |
| ENSG00000247627    | <i>mtnd4p12</i>        | MT-ND4 pseudogene 12                                                      | Ensembl_human        | -        | down   | 7.76E-04 | down  | 1.03E-04 | down  | 2.27E-04 | -67.2 |
| ENSG00000251544    | <i>mtnd5p12</i>        | MT-ND5 pseudogene 12                                                      | Ensembl_human        | -        | down   | -        | down  | -        | down  | 9.95E-02 | down  |
| ENSGACG0000001806  | <i>megf8</i>           | multiple EGF-like-domains 8                                               | Ensembl_stickleback  | -        | 1.0    | 9.02E-05 | up    | -        | -2.0  | -        | 1.6   |
| ENSGACG0000007818  | <i>mras</i>            | muscle RAS oncogene homolog                                               | Ensembl_stickleback  | -        | 1.0    | -        | -3.9  | 3.92E-03 | 40.7  | -        | -7.8  |
| ENSGACG0000008124  | <i>myof (1 of 2)</i>   | myoferlin                                                                 | Ensembl_stickleback  | -        | up     | -        | up    | -        | -1.4  | 1.33E-14 | down  |
| ENSGACG0000000114  | <i>myo18b (1 of 2)</i> | myosin XVIII B                                                            | Ensembl_stickleback  | -        | 0.00   | -        | down  | 3.24E-03 | down  | -        | 0.0   |
| ENSGACG00000010907 | <i>myoz1 (1 of 2)</i>  | myozenin 1                                                                | Ensembl_stickleback  | -        | 0.00   | 6.88E-05 | down  | -        | 0.0   | -        | up    |
| ENSDARG00000023369 | <i>mxd</i>             | myxovirus (influenza virus) resistance D                                  | Ensembl_zebrafish    | -        | -2.5   | 2.29E-07 | 31.6  | -        | -1.4  | -        | 0.0   |
| ENSORLG00000020815 | <i>nans</i>            | N-acetylneuraminic acid synthase                                          | Ensembl_medaka       | -        | 0.00   | 9.39E-03 | up    | -        | -5.1  | -        | down  |
| ENSGACG00000002420 | <i>ndufb8</i>          | NADH dehydrogenase (ubiquinone) 1 beta subcomplex, 8, 19kDa               | Ensembl_stickleback  | -        | down   | -        | 0.0   | 2.21E-03 | -16.4 | -        | -1.6  |
| ENSONIG00000015110 | <i>ndufaf2</i>         | NADH dehydrogenase (ubiquinone) complex I, assembly factor 2              | Ensembl_nile_tilapia | -        | 0.00   | -        | down  | 3.65E-02 | down  | -        | 0.0   |
| ENSGACG00000020925 | <i>nd1</i>             | NADH dehydrogenase subunit 1                                              | Ensembl_stickleback  | 2.42E-03 | down   | 1.43E-06 | down  | 8.60E-08 | down  | 1.55E-09 | down  |
| ENSGACG00000020947 | <i>nd4</i>             | NADH dehydrogenase subunit 4                                              | Ensembl_stickleback  | -        | down   | -        | down  | 8.79E-02 | down  | -        | down  |
| ENSGACG00000020951 | <i>nd5</i>             | NADH dehydrogenase subunit 5                                              | Ensembl_stickleback  | 6.09E-02 | -24.5  | 8.40E-02 | -6.8  | 1.77E-03 | -55.2 | 5.64E-06 | down  |
| ENSGACG00000014896 | <i>nckap5</i>          | NCK-associated protein 5                                                  | Ensembl_stickleback  | -        | 1.3    | -        | -1.9  | -        | -3.2  | 8.58E-03 | up    |
| ENSONIG00000017915 | <i>ndfip1 (2 of 2)</i> | Nedd4 family interacting protein 1                                        | Ensembl_nile_tilapia | -        | -1.5   | 5.59E-02 | down  | 5.83E-05 | down  | 1.19E-02 | down  |
| ENSGACG00000013006 | <i>napa</i>            | N-ethylmaleimide-sensitive factor attachment protein, alpha               | Ensembl_stickleback  | -        | down   | -        | 0.0   | 2.26E-02 | -34.4 | -        | 0.0   |
| ENSGACG00000006514 | <i>nsf (1 of 2)</i>    | N-ethylmaleimide-sensitive factor                                         | Ensembl_stickleback  | 4.19E-04 | down   | 5.07E-03 | -40.2 | 8.79E-02 | down  | -        | 0.0   |
| ENSGACG00000014174 | <i>nbeal1</i>          | neurobeachin-like 1                                                       | Ensembl_stickleback  | 1.24E-02 | -10.5  | -        | 1.3   | -        | -1.1  | -        | -3.4  |
| ENSGACG00000020827 | <i>ncf1</i>            | neutrophil cytosolic factor 1                                             | Ensembl_stickleback  | -        | -1.4   | -        | 1.9   | 3.04E-02 | -6.8  | -        | down  |
| ENSGACG00000004210 | <i>nid1 (1 of 2)</i>   | nidogen 1                                                                 | Ensembl_stickleback  | -        | 0.00   | 1.13E-04 | down  | -        | up    | -        | -1.6  |
| ENSGACG00000001588 | <i>ninj1</i>           | ninjurin 1                                                                | Ensembl_stickleback  | 3.75E-08 | -199.3 | -        | -3.1  | -        | 1.5   | -        | -1.1  |
| ENSDARG00000037958 | <i>nosip</i>           | nitric oxide synthase interacting protein                                 | Ensembl_zebrafish    | 3.75E-02 | down   | -        | -2.1  | -        | -3.8  | -        | 2.3   |
| ENSDARG00000044075 | <i>nkx6.2</i>          | NK6 transcription factor related, locus 2                                 | Ensembl_zebrafish    | -        | 0.00   | 1.45E-02 | -9.0  | -        | up    | -        | 0.0   |
| ENSGACG00000016365 | <i>nfatc3</i>          | nuclear factor of activated T-cells, cytoplasmic, calcineurin-dependent 3 | Ensembl_stickleback  | 1.34E-08 | 97.1   | -        | 1.0   | -        | 2.2   | -        | 0.0   |
| ENSDARG00000057741 | <i>nr1h4</i>           | nuclear receptor subfamily 1, group H, member 4                           | Ensembl_zebrafish    | -        | 0.00   | -        | 1.8   | 6.04E-02 | 19.5  | -        | -1.1  |
| ENSGACG00000012768 | <i>nucb1</i>           | nucleobindin 1                                                            | Ensembl_stickleback  | -        | -1.3   | -        | -1.5  | 3.65E-02 | down  | -        | -2.3  |

|                    |                       |                                                                                                                                                   |                     |          |      |          |      |          |       |          |       |
|--------------------|-----------------------|---------------------------------------------------------------------------------------------------------------------------------------------------|---------------------|----------|------|----------|------|----------|-------|----------|-------|
| ENSGACG00000015626 | <i>nucb2 (1 of 2)</i> | nucleobindin 2                                                                                                                                    | Ensembl_stickleback | -        | 1.6  | -        | -1.4 | 6.60E-02 | -6.9  | -        | up    |
| ENSORLG00000011426 | NOLC1 (1 of 2)        | nucleolar and coiled-body phosphoprotein 1                                                                                                        | Ensembl_medaka      | 4.69E-02 | up   | -        | -4.2 | -        | down  | -        | -5.5  |
| ENSGACG00000019459 | <i>nap1l1</i>         | nucleosome assembly protein 1-like 1                                                                                                              | Ensembl_stickleback | -        | -4.3 | -        | up   | 3.02E-02 | down  | -        | down  |
| ENSDARG00000016256 | <i>nudt3a</i>         | nudix (nucleoside diphosphate linked moiety X)-type motif 3a                                                                                      | Ensembl_zebrafish   | -        | 1.0  | 2.24E-04 | down | 3.27E-02 | -7.4  | -        | 1.2   |
| 1296952            | X92804.1              | O.mykiss vtg1 gene                                                                                                                                | nt                  | -        | 0.00 | -        | 0.0  | -        | 0.0   | 9.87E-04 | up    |
| ENSGACG00000016390 | <i>odz3 (2 of 2)</i>  | odz, odd Oz/ten-m homolog 3 (Drosophila)                                                                                                          | Ensembl_stickleback | -        | 2.4  | -        | -2.1 | 5.07E-02 | -9.7  | -        | down  |
| ES555559           | gb ES555559.1         | okis_FCE_L3-12.G09 Coho salmon ZAP Express ovarian library Oncorhynchus kisutch cDNA, mRNA sequence.                                              | EST_others          | -        | down | -        | -3.6 | 4.94E-04 | -27.4 | -        | -1.1  |
| 2258079            | AF009794.1            | Oncorhynchus gorbuscha microsatellite locus Ogo2, (ga)24                                                                                          | nt                  | -        | down | -        | down | 3.90E-03 | down  | -        | 0.0   |
| 164422326          | EU325858.1            | Oncorhynchus masou formosanus complement factor H1 protein (CFH) mRNA, complete cds                                                               | nt                  | -        | 0.00 | -        | 0.0  | -        | 0.0   | 5.91E-02 | -16.2 |
| 185133427          | NM_001124346.1        | Oncorhynchus mykiss apolipoprotein E (apoe), mRNA                                                                                                 | Refseq_genes        | -        | 1.5  | -        | -1.8 | -        | 5.0   | 3.31E-05 | up    |
| 225705221          | BT074033.1            | Oncorhynchus mykiss clone omyk-evo-501-128 Leucine-rich repeat-containing protein 42 putative mRNA, complete cds                                  | nt                  | -        | up   | 2.29E-02 | up   | -        | 1.2   | -        | up    |
| 225705363          | BT074104.1            | Oncorhynchus mykiss clone omyk-evo-501-224 Retinoic acid receptor responder protein 3 putative mRNA, complete cds                                 | nt                  | 3.75E-02 | up   | -        | up   | -        | up    | -        | 0.0   |
| 225704491          | BT073668.1            | Oncorhynchus mykiss clone omyk-evo-509-076 Cytochrome c oxidase subunit VIIa-related protein, mitochondrial precursor putative mRNA, complete cds | nt                  | -        | 1.7  | -        | 3.1  | 6.04E-02 | 8.1   | -        | 4.6   |
| 225705745          | BT074295.1            | Oncorhynchus mykiss clone omyk-evo-514-224 Tetratricopeptide repeat protein 1 putative mRNA, complete cds                                         | nt                  | -        | 1.6  | 4.41E-02 | up   | -        | 1.4   | -        | 3.3   |
| 185135625          | NM_001124385.1        | Oncorhynchus mykiss complement component 4 (c4), mRNA                                                                                             | Refseq_genes        | -        | down | 4.41E-02 | down | -        | up    | -        | -2.0  |
| 350537414          | NM_001246346.1        | Oncorhynchus mykiss complement factor D (adipsin) (cfd), mRNA                                                                                     | Refseq_genes        | -        | -1.0 | -        | 2.1  | 6.04E-02 | -5.0  | -        | -2.0  |
| 185134284          | NM_001124556.1        | Oncorhynchus mykiss FBPL4 (LOC100136303), mRNA                                                                                                    | Refseq_genes        | -        | down | -        | -8.3 | -        | -1.4  | 9.49E-03 | -7.2  |
| 261245070          | NM_001160506.1        | Oncorhynchus mykiss fish virus induced TRIM protein (fintrim), mRNA                                                                               | Refseq_genes        | -        | -1.3 | -        | -1.5 | 7.58E-02 | -4.9  | -        | -1.2  |
| 185132277          | NM_001124400.1        | Oncorhynchus mykiss fucosyltransferase 9 (fut9), mRNA                                                                                             | Refseq_genes        | -        | 2.0  | -        | 1.5  | 6.85E-02 | 6.6   | -        | 0.0   |
| 185132952          | NM_001124249.1        | Oncorhynchus mykiss glucokinase (gk), mRNA                                                                                                        | Refseq_genes        | -        | 2.4  | -        | down | -        | -1.4  | 1.28E-04 | 67.1  |
| 259089083          | NM_001165108.1        | Oncorhynchus mykiss heme binding protein 2 (hebp2), mRNA                                                                                          | Refseq_genes        | -        | 1.5  | -        | 1.3  | -        | up    | 4.52E-03 | 10.2  |
| 350537622          | NM_001246355.1        | Oncorhynchus mykiss IL-13 receptor-alpha-2-b precursor (il13ra2b), mRNA                                                                           | Refseq_genes        | -        | 2.3  | -        | 0.0  | 2.27E-04 | -30.9 | -        | -1.2  |

|           |                |                                                                                              |              |          |       |          |       |          |        |          |      |
|-----------|----------------|----------------------------------------------------------------------------------------------|--------------|----------|-------|----------|-------|----------|--------|----------|------|
| 185135498 | NM_001124308.1 | Oncorhynchus mykiss interleukin 13 receptor alpha-2 (LOC100135968), mRNA                     | Refseq_genes | -        | 2.5   | -        | -1.7  | 9.34E-06 | -119.0 | -        | 0.0  |
| 34809457  | AY386796.1     | Oncorhynchus mykiss isolate BamACG-HpaACG tissue-specific MS-AFLP genomic fragment           | nt           | 3.85E-03 | down  | -        | -2.5  | 4.02E-02 | -9.8   | -        | -4.3 |
| 185135324 | NM_001124376.1 | Oncorhynchus mykiss keratin 13 (k13), mRNA                                                   | Refseq_genes | -        | 1.4   | -        | 6.9   | 6.99E-02 | up     | -        | 1.4  |
| 185135579 | NM_001124309.1 | Oncorhynchus mykiss LECT2 neutrophil chemotactic factor (lect2), mRNA                        | Refseq_genes | -        | down  | -        | down  | 1.95E-02 | -17.9  | -        | down |
| 259089112 | NM_001165121.1 | Oncorhynchus mykiss lipopolysaccharide-induced TNF factor (litaf), mRNA                      | Refseq_genes | -        | 1.5   | 3.04E-04 | down  | -        | 2.3    | -        | -2.3 |
| 238231538 | NM_001160480.1 | Oncorhynchus mykiss mannan-binding lectin H2 (LOC100301642), mRNA                            | Refseq_genes | -        | 0.00  | -        | -2.7  | 2.82E-04 | -13.2  | -        | down |
| 33414970  | AY278452.1     | Oncorhynchus mykiss MHC class I antigen (Onmy-UBA) mRNA, Onmy-UBA-*4401 allele, complete cds | nt           | 2.78E-03 | down  | 2.21E-04 | -39.1 | 7.24E-05 | down   | 1.87E-02 | down |
| 14389032  | AF375014.1     | Oncorhynchus mykiss microsatellite OMM1041 sequence                                          | nt           | -        | 3.4   | -        | up    | 1.42E-03 | up     | -        | 0.0  |
| 40794777  | AY518339.1     | Oncorhynchus mykiss microsatellite Omy1016UW sequence                                        | nt           | -        | -3.0  | -        | -1.9  | 8.46E-02 | -6.9   | -        | -1.1 |
| 387155688 | FN824527.1     | Oncorhynchus mykiss mRNA for cytokine receptor family member b5 precursor (crfb5 gene)       | nt           | 8.69E-02 | 9.6   | -        | 0.0   | -        | -1.6   | -        | 3.7  |
| 11863729  | AJ303076.1     | Oncorhynchus mykiss partial mRNA for Lamin B2 protein                                        | nt           | 7.42E-04 | down  | -        | -1.7  | 8.79E-02 | -6.0   | 2.94E-02 | down |
| 259089457 | NM_001165057.1 | Oncorhynchus mykiss SMT3 suppressor of mif two 3 homolog 2 (S. cerevisiae) (sumo2), mRNA     | Refseq_genes | -        | -2.3  | -        | 1.8   | 1.28E-02 | up     | -        | 0.0  |
| 185134543 | NM_001124290.1 | Oncorhynchus mykiss stanniocalcin (LOC100135946), mRNA                                       | Refseq_genes | -        | 0.00  | -        | 0.0   | 4.31E-10 | down   | -        | 0.0  |
| 318065039 | HM190266.1     | Oncorhynchus mykiss transferrin receptor mRNA, partial cds                                   | nt           | -        | 2.7   | 4.41E-02 | down  | -        | 3.2    | -        | -1.1 |
| 194018416 | NM_001129986.1 | Oncorhynchus mykiss type II keratin E3 (e3), mRNA                                            | Refseq_genes | -        | down  | 6.22E-03 | down  | -        | 0.0    | -        | 0.0  |
| 238231355 | NM_001160640.1 | Oncorhynchus mykiss Vacuolar ATP synthase 16 kDa proteolipid subunit (vat1), mRNA            | Refseq_genes | -        | down  | -        | 0.0   | 6.99E-02 | down   | -        | down |
| 185134302 | NM_001124285.1 | Oncorhynchus mykiss VIG-2 protein (vig-2), mRNA                                              | Refseq_genes | -        | -1.6  | -        | -6.2  | 6.04E-02 | -13.8  | -        | up   |
| 185134310 | NM_001124274.1 | Oncorhynchus mykiss vitelline envelope protein gamma (LOC100135907), mRNA                    | Refseq_genes | -        | down  | -        | down  | -        | 0.0    | 1.49E-09 | 49.1 |
| 259089103 | NM_001165118.1 | Oncorhynchus mykiss zinc finger, matrin type 2 (zmat2), mRNA                                 | Refseq_genes | 3.75E-02 | down  | -        | -1.5  | -        | -2.1   | -        | down |
| 185132233 | NM_001124600.1 | Oncorhynchus mykiss zona pellucida glycoprotein 2.3 (zp2.3), mRNA                            | Refseq_genes | -        | 0.00  | -        | 0.0   | -        | 0.0    | 4.15E-04 | up   |
| 71381926  | DQ025596.1     | Oncorhynchus tshawytscha clone Ots.u211.76.64 genomic sequence                               | nt           | -        | down  | -        | down  | 5.70E-06 | down   | -        | -3.1 |
| 24637708  | AF527060.1     | Oncorhynchus tshawytscha virus-inducible stress protein (VISP) mRNA, complete cds            | nt           | -        | -1.3  | -        | -2.1  | 6.27E-02 | -5.4   | -        | 1.1  |
| 157311696 | NM_001105103.1 | Oryzias latipes Mhc class I A (orla-uaa), mRNA                                               | Refseq_genes | 8.93E-05 | -72.6 | 2.66E-02 | -30.7 | 1.68E-03 | down   | -        | down |

|                    |                        |                                                                                                               |                     |          |       |          |       |          |       |          |       |
|--------------------|------------------------|---------------------------------------------------------------------------------------------------------------|---------------------|----------|-------|----------|-------|----------|-------|----------|-------|
| 225708383          | BT075614.1             | Osmerus mordax clone omor-eva-506-307 Methyltransferase-like protein 7A precursor putative mRNA, complete cds | nt                  | -        | 1.3   | -        | 1.3   | -        | 2.2   | 1.00E-02 | 11.2  |
| 225706089          | BT074467.1             | Osmerus mordax clone omor-eva-508-066 Deoxyribonuclease-1 precursor putative mRNA, complete cds               | nt                  | -        | 0.00  | 2.85E-02 | down  | -        | 0.0   | -        | 0.0   |
| ENSGACG00000004331 | <i>pank4</i>           | pantothenate kinase 4                                                                                         | Ensembl_stickleback | -        | down  | -        | 2.4   | 6.03E-03 | -11.3 | -        | 1.4   |
| ENSGACG00000016727 | <i>papd5</i>           | PAP associated domain containing 5                                                                            | Ensembl_stickleback | 8.13E-02 | 8.9   | -        | 1.1   | -        | 1.2   | -        | 5.6   |
| ENSGACG00000007828 | <i>pon1</i>            | paraoxonase 1                                                                                                 | Ensembl_stickleback | -        | 0.00  | -        | down  | 4.67E-03 | down  | -        | 19.0  |
| ENSGACG00000007536 | <i>ptms</i>            | parathyrosin                                                                                                  | Ensembl_stickleback | -        | 2.2   | -        | 2.5   | 5.27E-02 | 5.5   | -        | up    |
| ENSDARG00000031777 | <i>pparaa</i>          | peroxisome proliferator-activated receptor alpha a                                                            | Ensembl_zebrafish   | -        | -1.6  | -        | 1.3   | 8.53E-02 | 6.0   | -        | 1.7   |
| ENSGACG00000009302 | <i>pes1</i>            | pescadillo ribosomal biogenesis factor 1                                                                      | Ensembl_stickleback | 5.86E-02 | -15.6 | -        | 0.0   | -        | 0.0   | 1.70E-04 | down  |
| ENSORLG00000006231 | <i>pten</i>            | phosphatase and tensin homolog                                                                                | Ensembl_medaka      | -        | 0.00  | -        | 1.1   | 5.65E-02 | down  | -        | 0.0   |
| ENSGACG00000011516 | <i>ppap2c (1 of 2)</i> | phosphatidic acid phosphatase type 2C                                                                         | Ensembl_stickleback | -        | -1.0  | -        | down  | 5.65E-02 | down  | -        | -1.6  |
| ENSGACG00000015853 | <i>pigb</i>            | phosphatidylinositol glycan anchor biosynthesis, class B                                                      | Ensembl_stickleback | 2.00E-02 | down  | -        | 0.0   | -        | 0.0   | -        | down  |
| ENSGACG00000005401 | <i>ptdss1 (2 of 2)</i> | phosphatidylserine synthase 1                                                                                 | Ensembl_stickleback | 2.19E-04 | -64.1 | -        | 0.0   | -        | up    | -        | up    |
| ENSGACG00000002045 | <i>pde6d</i>           | phosphodiesterase 6D, cGMP-specific, rod, delta                                                               | Ensembl_stickleback | -        | down  | -        | 0.0   | 1.70E-04 | down  | -        | down  |
| ENSDARG00000060280 | <i>pde9a (1 of 2)</i>  | phosphodiesterase 9A                                                                                          | Ensembl_zebrafish   | -        | -2.1  | -        | -2.8  | -        | 2.8   | 2.31E-02 | down  |
| ENSDARG00000013522 | <i>pck1</i>            | phosphoenolpyruvate carboxykinase 1 (soluble)                                                                 | Ensembl_zebrafish   | -        | 0.00  | -        | up    | -        | 3.7   | 4.39E-03 | -11.1 |
| ENSDARG00000009153 | <i>pla2g1b</i>         | phospholipase A2, group IB (pancreas)                                                                         | Ensembl_zebrafish   | -        | -1.7  | 6.16E-05 | -19.8 | -        | -1.0  | -        | 2.2   |
| ENSGACG00000012490 | <i>plcb1 (1 of 2)</i>  | phospholipase C, beta 1 (phosphoinositide-specific)                                                           | Ensembl_stickleback | -        | 1.2   | -        | 1.3   | 3.68E-02 | 12.5  | -        | -1.1  |
| ENSDARG00000037506 | <i>prps1b</i>          | phosphoribosyl pyrophosphate synthetase 1B                                                                    | Ensembl_zebrafish   | -        | 1.8   | 9.89E-05 | up    | -        | 1.7   | -        | 1.0   |
| ENSGACG00000019001 | <i>pim3</i>            | pim-3 oncogene                                                                                                | Ensembl_stickleback | -        | 1.1   | -        | 1.0   | 7.50E-02 | 5.4   | -        | up    |
| ENSGACG00000010777 | <i>pls1</i>            | plastin 1                                                                                                     | Ensembl_stickleback | -        | down  | 1.08E-03 | -9.7  | -        | 0.0   | -        | 1.4   |
| ENSGACG00000016743 | <i>psd4</i>            | pleckstrin and Sec7 domain containing 4                                                                       | Ensembl_stickleback | 5.74E-06 | down  | -        | 0.0   | 3.65E-02 | down  | 6.61E-08 | down  |
| ENSGACG00000005254 | <i>plekhm2</i>         | pleckstrin homology domain containing, family M (with RUN domain) member 2                                    | Ensembl_stickleback | -        | -7.2  | -        | 1.0   | 8.87E-02 | -7.4  | -        | -1.5  |
| ENSGACG00000007218 | <i>plk2</i>            | polo-like kinase 2                                                                                            | Ensembl_stickleback | 3.04E-05 | 19.9  | -        | 1.9   | -        | -1.6  | -        | -1.9  |
| ENSDARG00000017219 | <i>pabpc1a</i>         | poly A binding protein, cytoplasmic 1 a                                                                       | Ensembl_zebrafish   | 1.61E-02 | -8.0  | 1.19E-06 | -32.8 | 2.23E-07 | -40.1 | 2.49E-05 | -20.5 |
| ENSGACG00000019366 | <i>polr2a</i>          | polymerase (RNA) II (DNA directed) polypeptide A, 220kDa                                                      | Ensembl_stickleback | -        | -1.0  | -        | -1.4  | 1.81E-03 | -22.3 | -        | 1.0   |
| ENSG00000129159    | <i>kcnc1</i>           | potassium voltage-gated channel, Shaw-related subfamily, member 1                                             | Ensembl_human       | -        | down  | -        | 1.0   | -        | -4.1  | 5.46E-03 | -41.3 |
| ENSGACG00000004944 | <i>pqlc2</i>           | PQ loop repeat containing 2                                                                                   | Ensembl_stickleback | -        | -3.3  | -        | -3.1  | 4.57E-02 | -6.7  | -        | -1.7  |

|           |                |                                                                                  |                 |          |       |          |        |          |      |          |       |
|-----------|----------------|----------------------------------------------------------------------------------|-----------------|----------|-------|----------|--------|----------|------|----------|-------|
| 327274185 | XM_003221811.1 | PREDICTED: Anolis carolinensis synaptopodin-2-like (LOC100567593), mRNA          | Refseq_genes    | -        | down  | 7.30E-02 | -7.0   | -        | 0.0  | -        | 2.8   |
| 326678863 | XP_001922687.3 | PREDICTED: antihemorrhagic factor cHLP-B                                         | Refseq_proteins | -        | 1.1   | 5.49E-02 | -15.5  | -        | -2.7 | -        | -2.3  |
| 410923967 | XP_003975453.1 | PREDICTED: apolipoprotein D-like                                                 | Refseq_proteins | -        | 0.00  | 1.43E-06 | -39.9  | -        | 0.0  | 1.35E-02 | 10.4  |
| 410900828 | XP_003963898.1 | PREDICTED: cadherin-5-like                                                       | Refseq_proteins | -        | -1.0  | -        | -1.9   | 7.67E-02 | 12.2 | -        | -1.8  |
| 432943847 | XP_004083297.1 | PREDICTED: cathepsin E-A-like                                                    | Refseq_proteins | -        | up    | -        | up     | -        | -1.4 | 1.01E-20 | up    |
| 432882457 | XP_004074040.1 | PREDICTED: cell division cycle-associated 7-like protein-like                    | Refseq_proteins | -        | down  | -        | 1.1    | 1.59E-02 | down | -        | 0.0   |
| 326671170 | XP_003199376.1 | PREDICTED: complement C1q-like protein 2-like                                    | Refseq_proteins | -        | 0.00  | -        | 0.0    | -        | 0.0  | 3.38E-15 | down  |
| 348501087 | XP_003438102.1 | PREDICTED: complement factor H-like                                              | Refseq_proteins | -        | 0.00  | -        | 0.0    | -        | 0.0  | 8.65E-13 | down  |
| 348517015 | XP_003446031.1 | PREDICTED: C-type lectin domain family 10 member A-like                          | Refseq_proteins | -        | 0.00  | -        | 0.0    | -        | 0.0  | 8.24E-02 | -7.4  |
| 326669577 | XP_001923321.2 | PREDICTED: cytochrome P450 2F2-like                                              | Refseq_proteins | -        | 0.00  | 5.59E-02 | down   | -        | 0.0  | 4.84E-11 | down  |
| 348538469 | XP_003456713.1 | PREDICTED: cytolysin Src-1-like                                                  | Refseq_proteins | 7.32E-02 | down  | -        | 0.0    | -        | down | -        | 0.0   |
| 326667554 | XP_002667068.2 | PREDICTED: cytosolic phospholipase A2 gamma                                      | Refseq_proteins | 2.78E-03 | 15.2  | -        | 0.0    | -        | -1.0 | -        | down  |
| 410932293 | XP_003979528.1 | PREDICTED: dimethylaniline monooxygenase                                         | Refseq_proteins | -        | 0.00  | 2.45E-03 | up     | -        | 1.8  | -        | -1.5  |
| 348521084 | XP_003448056.1 | PREDICTED: E3 ubiquitin/ISG15 ligase TRIM25-like                                 | Refseq_proteins | -        | -1.1  | -        | 6.3    | 4.49E-02 | up   | -        | down  |
| 410910654 | XP_003968805.1 | PREDICTED: endonuclease domain-containing 1 protein-like                         | Refseq_proteins | -        | 2.4   | 8.77E-02 | -14.4  | -        | 0.0  | -        | 0.0   |
| 348525982 | XP_003450500.1 | PREDICTED: endonuclease domain-containing 1 protein-like                         | Refseq_proteins | 1.36E-02 | 8.8   | 5.59E-02 | up     | -        | up   | -        | 0.0   |
| 338718465 | XM_001498233.3 | PREDICTED: Equus caballus meprin A, alpha (PABA peptide hydrolase) (MEP1A), mRNA | nt              | -        | 0.00  | 1.60E-12 | -243.0 | -        | 0.0  | -        | up    |
| 327269633 | XP_003219598.1 | PREDICTED: fatty acid-binding protein, adipocyte-like                            | Refseq_proteins | 2.08E-03 | up    | -        | 0.0    | -        | 0.0  | -        | 0.0   |
| 363738171 | XP_001231970.2 | PREDICTED: fatty acyl-CoA hydrolase precursor, medium chain isoform 1            | Refseq_proteins | -        | -1.7  | -        | -9.3   | -        | 2.2  | 3.74E-02 | down  |
| 348525178 | XP_003450099.1 | PREDICTED: GTPase SLIP-GC-like, partial                                          | Refseq_proteins | -        | -1.1  | -        | -1.0   | 1.96E-04 | down | -        | 0.0   |
| 348539876 | XP_003457415.1 | PREDICTED: heat shock 70 kDa protein 12A-like                                    | Refseq_proteins | 3.56E-06 | down  | -        | 0.0    | -        | 0.0  | -        | 0.0   |
| 125807411 | XP_001343562.1 | PREDICTED: hypothetical protein LOC100004199                                     | Refseq_proteins | -        | 2.5   | 2.02E-04 | -13.5  | 9.69E-02 | 5.6  | -        | down  |
| 189517525 | XP_001923568.1 | PREDICTED: hypothetical protein LOC100149918                                     | Refseq_proteins | -        | down  | -        | down   | -        | 0.0  | 5.60E-04 | 11.4  |
| 327281562 | XP_003225516.1 | PREDICTED: hypothetical protein LOC100561123                                     | Refseq_proteins | -        | 0.00  | -        | 0.0    | 6.99E-02 | down | -        | up    |
| 348526073 | XP_003450545.1 | PREDICTED: hypothetical protein LOC100690208                                     | Refseq_proteins | 3.46E-03 | -13.1 | 6.88E-05 | down   | 5.66E-03 | down | -        | up    |
| 348526794 | XP_003450904.1 | PREDICTED: hypothetical protein LOC100696199                                     | Refseq_proteins | -        | 0.00  | -        | 1.3    | -        | 0.0  | 2.07E-04 | -19.6 |
| 348513025 | XP_003444043.1 | PREDICTED: hypothetical protein LOC100707007                                     | Refseq_proteins | 3.15E-02 | down  | -        | 0.0    | 3.65E-02 | up   | -        | up    |
| 348539792 | XP_003457373.1 | PREDICTED: hypothetical protein LOC100709472                                     | Refseq_proteins | 1.65E-03 | -47.6 | 1.27E-03 | -49.6  | -        | 0.0  | -        | 0.0   |

|           |                |                                                                                                   |                 |          |      |          |        |          |       |          |      |
|-----------|----------------|---------------------------------------------------------------------------------------------------|-----------------|----------|------|----------|--------|----------|-------|----------|------|
| 348545569 | XP_003460252.1 | PREDICTED: hypothetical protein LOC100709671                                                      | Refseq_proteins | -        | down | -        | down   | 4.49E-02 | down  | -        | down |
| 348529410 | XP_003452206.1 | PREDICTED: hypothetical protein LOC100710425                                                      | Refseq_proteins | -        | 0.00 | -        | down   | -        | 0.0   | 4.20E-02 | -6.5 |
| 68444937  | XP_706427.1    | PREDICTED: hypothetical protein LOC567961                                                         | Refseq_proteins | -        | 4.4  | 2.87E-03 | up     | -        | up    | -        | 0.0  |
| 125811426 | XP_001335256.1 | PREDICTED: hypothetical protein LOC795145                                                         | Refseq_proteins | 2.19E-08 | 75.4 | 8.58E-10 | -166.1 | -        | down  | -        | down |
| 410906097 | XP_003966528.1 | PREDICTED: insulin receptor substrate 2-like                                                      | Refseq_proteins | -        | -2.5 | -        | down   | -        | -2.8  | 2.94E-02 | down |
| 326674126 | XP_003200076.1 | PREDICTED: integrin alpha-E-like                                                                  | Refseq_proteins | -        | -1.8 | -        | 1.2    | -        | -1.5  | 6.95E-03 | down |
| 326665123 | XP_691524.5    | PREDICTED: interferon-induced guanylate-binding protein 1                                         | Refseq_proteins | -        | -1.1 | -        | 1.5    | 7.71E-05 | -88.2 | -        | up   |
| 189514417 | XP_001345882.2 | PREDICTED: interferon-induced protein 44                                                          | Refseq_proteins | -        | -7.9 | 3.54E-02 | 9.3    | -        | 1.9   | -        | -7.0 |
| 326670954 | XP_001336175.4 | PREDICTED: interferon-induced protein 44                                                          | Refseq_proteins | -        | -4.0 | 2.12E-06 | 52.4   | -        | -3.2  | -        | 2.9  |
| 432873596 | XP_004072295.1 | PREDICTED: kallikrein-2-like                                                                      | Refseq_proteins | 1.51E-06 | 28.5 | -        | 3.6    | -        | down  | -        | 0.0  |
| 348532506 | XP_003453747.1 | PREDICTED: leucine-rich repeats and immunoglobulin-like domains protein 2                         | Refseq_proteins | -        | down | 7.27E-02 | down   | 3.59E-04 | down  | -        | 2.3  |
| 348507107 | XR_134778.1    | PREDICTED: Oreochromis niloticus fibroblast growth factor receptor 2-like (LOC100699731), miscRNA | Refseq_genes    | -        | -1.7 | -        | 1.2    | -        | 1.5   | 1.00E-02 | down |
| 348500648 | XM_003437837.1 | PREDICTED: Oreochromis niloticus hypothetical protein LOC100692229 (LOC100692229), mRNA           | Refseq_genes    | -        | down | -        | 0.0    | 3.02E-02 | down  | -        | up   |
| 348523192 | XM_003449060.1 | PREDICTED: Oreochromis niloticus hypothetical protein LOC100703724 (LOC100703724), mRNA           | Refseq_genes    | 1.36E-02 | down | -        | -2.0   | -        | -2.6  | -        | 0.0  |
| 348544302 | XM_003459573.1 | PREDICTED: Oreochromis niloticus hypothetical protein LOC100710022 (LOC100710022), mRNA           | Refseq_genes    | 3.15E-02 | down | 9.39E-03 | down   | 1.97E-05 | down  | -        | down |
| 348526849 | XM_003450884.1 | PREDICTED: Oreochromis niloticus protein S100-A11-like (LOC100703730), mRNA                       | Refseq_genes    | -        | 0.00 | -        | down   | 4.86E-03 | 7.8   | -        | 0.0  |
| 348524437 | XM_003449682.1 | PREDICTED: Oreochromis niloticus transmembrane protein 192-like (LOC100691376), mRNA              | Refseq_genes    | 3.15E-02 | up   | -        | up     | 4.67E-03 | up    | -        | down |
| 348517992 | XP_003446516.1 | PREDICTED: protachykinin-like                                                                     | Refseq_proteins | -        | 0.00 | 3.74E-03 | -13.5  | -        | -1.8  | -        | 1.3  |
| 348523519 | XP_003449271.1 | PREDICTED: protection of telomeres protein 1-like                                                 | Refseq_proteins | -        | -2.4 | -        | up     | -        | 0.0   | 9.95E-02 | up   |
| 348538993 | XP_003456974.1 | PREDICTED: protein GPR108-like                                                                    | Refseq_proteins | 7.32E-02 | down | -        | -4.3   | -        | 0.0   | -        | down |
| 432873602 | XP_004072298.1 | PREDICTED: putative defense protein 3-like                                                        | Refseq_proteins | -        | 0.00 | -        | down   | -        | down  | 1.21E-02 | 13.4 |
| 301624357 | XP_002941477.1 | PREDICTED: retinal homeobox protein Rx-like                                                       | Refseq_proteins | -        | 0.00 | 7.90E-02 | -11.7  | -        | 0.0   | -        | 0.0  |
| 348516493 | XP_003445773.1 | PREDICTED: RNA-binding protein 26-like                                                            | Refseq_proteins | -        | 3.2  | -        | 1.0    | 8.79E-02 | down  | -        | 3.7  |
| 326663987 | XP_003197704.1 | PREDICTED: synaptopodin-2                                                                         | Refseq_proteins | -        | 0.00 | 7.34E-02 | -6.8   | -        | 0.0   | -        | down |
| 348506200 | XP_003440648.1 | PREDICTED: synemin-like                                                                           | Refseq_proteins | -        | 4.8  | 4.41E-02 | down   | -        | 2.2   | -        | up   |
| 410924755 | XM_003975798.1 | PREDICTED: Takifugu rubripes alpha-2-HS-glycoprotein-like (LOC101076681), mRNA                    | Refseq_genes    | -        | 0.00 | -        | 0.0    | -        | up    | 2.29E-18 | down |

|                    |                       |                                                                                                                 |                      |          |       |          |       |          |        |          |      |
|--------------------|-----------------------|-----------------------------------------------------------------------------------------------------------------|----------------------|----------|-------|----------|-------|----------|--------|----------|------|
| 410923730          | XM_003975286.1        | PREDICTED: Takifugu rubripes glycosylphosphatidylinositol anchor attachment 1 protein-like (LOC101070382), mRNA | Refseq_genes         | 1.61E-02 | down  | -        | -1.2  | -        | -3.5   | -        | -1.1 |
| 410919522          | XM_003973185.1        | PREDICTED: Takifugu rubripes poly(U)-specific endoribonuclease-like (LOC101064652), mRNA                        | Refseq_genes         | -        | 0.00  | 5.95E-04 | -34.0 | -        | 0.0    | -        | down |
| 410922242          | XM_003974543.1        | PREDICTED: Takifugu rubripes UDP-glucuronosyltransferase 2A2-like (LOC101068092), mRNA                          | Refseq_genes         | -        | 1.2   | 9.79E-02 | -6.9  | -        | 0.0    | 8.31E-04 | down |
| 410926977          | XP_003976944.1        | PREDICTED: trypsinogen-like protein 3-like, partial                                                             | Refseq_proteins      | -        | up    | 3.12E-04 | -20.6 | -        | 0.0    | -        | -2.7 |
| 348508195          | XP_003441640.1        | PREDICTED: tsukushin-like                                                                                       | Refseq_proteins      | 1.36E-02 | down  | -        | 1.0   | -        | 1.3    | -        | -1.5 |
| 432926066          | XP_004080813.1        | PREDICTED: UDP-glucuronosyltransferase 2B31-like                                                                | Refseq_proteins      | -        | 0.00  | -        | down  | 9.62E-02 | 8.5    | -        | 1.3  |
| 410905289          | XP_003966124.1        | PREDICTED: urokinase plasminogen activator surface receptor-like                                                | Refseq_proteins      | -        | -3.3  | -        | -1.8  | 4.63E-10 | -110.8 | -        | down |
| 410929355          | XP_003978065.1        | PREDICTED: WAS/WASL-interacting protein family member 2-like                                                    | Refseq_proteins      | -        | -3.4  | 2.85E-02 | down  | -        | 0.0    | -        | 4.7  |
| ENSDARG00000035350 | <i>ins</i>            | preproinsulin                                                                                                   | Ensembl_zebrafish    | -        | 0.00  | 3.65E-03 | -17.3 | -        | 0.0    | -        | 0.0  |
| ENSGACG00000009139 | <i>pfn2 (1 of 2)</i>  | profilin 2                                                                                                      | Ensembl_stickleback  | -        | down  | 3.51E-04 | down  | 4.49E-02 | down   | -        | down |
| ENSONIG00000007715 | <i>plr (1 of 2)</i>   | prolactin receptor                                                                                              | Ensembl_nile_tilapia | -        | -1.5  | -        | -2.1  | 3.23E-02 | 8.9    | -        | 0.0  |
| ENSONIG00000009922 | <i>psap1</i>          | prosaposin-like 1 (gene/pseudogene)                                                                             | Ensembl_nile_tilapia | -        | down  | 2.07E-03 | down  | 8.21E-08 | down   | 3.74E-02 | down |
| ENSDARG00000017213 | <i>prss35</i>         | protease, serine, 35                                                                                            | Ensembl_zebrafish    | -        | 1.0   | -        | 1.9   | 7.05E-02 | 6.5    | -        | 2.7  |
| ENSGACG0000000107  | <i>psmb9 (5 of 5)</i> | proteasome (prosome, macropain) subunit, beta type, 9 (large multifunctional peptidase 2)                       | Ensembl_stickleback  | 6.83E-05 | up    | 2.61E-02 | 9.5   | 1.04E-02 | up     | -        | 0.0  |
| ENSGACG00000019857 | <i>pacsin2</i>        | protein kinase C and casein kinase substrate in neurons 2                                                       | Ensembl_stickleback  | -        | -1.4  | -        | -1.3  | 3.02E-02 | -8.3   | -        | 9.6  |
| ENSORLG00000015712 | <i>prkch</i>          | protein kinase C, eta                                                                                           | Ensembl_medaka       | -        | 1.7   | -        | -2.7  | 2.77E-03 | down   | -        | 2.2  |
| ENSDARG00000079585 | <i>pkn3</i>           | protein kinase N3                                                                                               | Ensembl_zebrafish    | -        | -2.3  | -        | 3.7   | 2.99E-03 | -50.1  | -        | up   |
| ENSDARG00000089608 | <i>ppp1cbl</i>        | protein phosphatase 1, catalytic subunit, beta isoform, like                                                    | Ensembl_zebrafish    | -        | 1.9   | -        | 3.2   | 1.03E-04 | down   | -        | up   |
| ENSGACG00000005491 | <i>ppp1r21</i>        | protein phosphatase 1, regulatory subunit 21                                                                    | Ensembl_stickleback  | -        | 1.7   | -        | 1.1   | 1.08E-03 | -29.9  | -        | up   |
| ENSGACG00000007843 | <i>ptprc</i>          | protein tyrosine phosphatase, receptor type, C                                                                  | Ensembl_stickleback  | -        | -1.9  | -        | -3.2  | 6.99E-02 | -5.8   | -        | -1.8 |
| ENSGACG00000012481 | <i>ralgapa1</i>       | Ral GTPase activating protein, alpha subunit 1 (catalytic)                                                      | Ensembl_stickleback  | -        | -6.2  | -        | -2.7  | 5.07E-02 | -29.1  | -        | -4.1 |
| ENSDARG00000005989 | <i>rgl1</i>           | ral guanine nucleotide dissociation stimulator-like 1                                                           | Ensembl_zebrafish    | -        | -1.5  | -        | 1.7   | 3.40E-02 | 12.6   | -        | 2.8  |
| 223646095          | NP_001138713.1        | rapunzel2                                                                                                       | Refseq_proteins      | -        | 0.00  | 5.59E-02 | up    | -        | 0.0    | -        | 0.0  |
| ENSGACG00000002543 | <i>rqcd1</i>          | RCD1 required for cell differentiation1 homolog (S. pombe)                                                      | Ensembl_stickleback  | -        | -11.6 | 9.39E-03 | down  | 1.73E-05 | -44.1  | -        | 0.0  |
| ENSDARG00000021869 | <i>rcan2</i>          | regulator of calcineurin 2                                                                                      | Ensembl_zebrafish    | -        | -1.7  | -        | -1.3  | -        | -1.7   | 8.21E-02 | 6.1  |



|                    |                         |                                                                                                    |                      |          |      |          |       |          |       |          |      |
|--------------------|-------------------------|----------------------------------------------------------------------------------------------------|----------------------|----------|------|----------|-------|----------|-------|----------|------|
| ENSDARG00000090039 | <i>reck</i>             | reversion-inducing- cysteine-rich protein with kazal motifs                                        | Ensembl_zebrafish    | -        | -1.4 | -        | 1.3   | 6.99E-02 | up    | -        | -1.1 |
| ENSGACG00000013298 | <i>arhgdia (1 of 2)</i> | Rho GDP dissociation inhibitor (GDI) alpha                                                         | Ensembl_stickleback  | 3.85E-03 | down | -        | 83.1  | -        | 1.0   | -        | up   |
| ENSGACG00000019358 | <i>arhgef15</i>         | Rho guanine nucleotide exchange factor (GEF) 15                                                    | Ensembl_stickleback  | 3.85E-03 | down | -        | 1.2   | -        | -2.3  | -        | up   |
| 222137251          | FJ002822.1              | Rhycophila balcanica voucher Rba1L1 16S ribosomal RNA gene, partial sequence; mitochondrial        | nt                   | -        | 0.00 | 1.52E-06 | 123.1 | -        | 0.0   | -        | 0.0  |
| ENSONIG00000002839 | <i>rpp21</i>            | ribonuclease P/MRP 21kDa subunit                                                                   | Ensembl_nile_tilapia | -        | -1.3 | -        | -1.2  | -        | 1.2   | 2.30E-02 | 7.4  |
| ENSGACG00000012811 | <i>rps6ka3</i>          | ribosomal protein S6 kinase, 90kDa, polypeptide 3                                                  | Ensembl_stickleback  | 9.69E-02 | 5.6  | -        | 2.2   | -        | 1.1   | 2.74E-06 | 52.0 |
| ENSORLG00000011879 | <i>rrbp1</i>            | ribosome binding protein 1 homolog 180kDa (dog)                                                    | Ensembl_medaka       | -        | -1.1 | -        | 1.1   | -        | 1.2   | 8.95E-02 | 5.5  |
| ENSONIG00000010011 | <i>rrbp1</i>            | ribosome binding protein 1 homolog 180kDa (dog)                                                    | Ensembl_nile_tilapia | -        | 0.00 | -        | 1.2   | -        | -1.6  | 1.00E-02 | up   |
| ENSMUSG00000026955 | 2010317E24Rik           | RIKEN cDNA 2010317E24 gene                                                                         | Ensembl_mouse        | -        | 0.00 | 4.56E-06 | down  | -        | 0.0   | -        | 0.0  |
| ENSGACG00000016138 | <i>rnf165 (1 of 2)</i>  | ring finger protein 165                                                                            | Ensembl_stickleback  | -        | 0.00 | 4.41E-02 | down  | 9.33E-05 | down  | -        | down |
| ENSGACG00000005671 | <i>rbms1 (1 of 2)</i>   | RNA binding motif, single stranded interacting protein 1                                           | Ensembl_stickleback  | -        | down | -        | down  | 3.02E-02 | down  | -        | up   |
| ENSDARG00000045930 | <i>rbpms2 (1 of 2)</i>  | RNA binding protein with multiple splicing 2                                                       | Ensembl_zebrafish    | -        | 1.0  | 7.78E-02 | -6.1  | -        | 1.8   | -        | up   |
| ENSONIG00000008341 | <i>rbfox2 (1 of 2)</i>  | RNA binding protein, fox-1 homolog (C. elegans) 2                                                  | Ensembl_nile_tilapia | -        | down | -        | up    | -        | down  | 1.87E-02 | up   |
| ENSGACG00000020220 | <i>ruvbl2</i>           | RuvB-like 2 (E. coli)                                                                              | Ensembl_stickleback  | -        | 0.00 | 5.75E-05 | -15.9 | -        | 0.0   | -        | 0.0  |
| 213513492          | NM_001140687.1          | Salmo salar 40S ribosomal protein S15a (rs15a), mRNA                                               | Refseq_genes         | -        | 1.3  | 5.59E-02 | up    | -        | 1.8   | -        | down |
| 213513418          | NM_001139890.1          | Salmo salar 60 kDa lysophospholipase (lpp60), mRNA                                                 | Refseq_genes         | -        | -2.5 | -        | down  | 4.41E-02 | -9.6  | -        | -1.6 |
| 259155117          | NM_001165329.1          | Salmo salar adenosine monophosphate deaminase 3 (ampd3), mRNA                                      | Refseq_genes         | -        | 1.1  | -        | -5.2  | 8.79E-02 | -5.3  | -        | 2.2  |
| 291190403          | NM_001173641.1          | Salmo salar Alpha-1,3-mannosyl-glycoprotein 4-beta-N-acetylglucosaminyltransferase A (mgt4a), mRNA | Refseq_genes         | -        | 2.6  | -        | 1.9   | 8.78E-02 | -25.6 | -        | 0.0  |
| 213513162          | NM_001141362.1          | Salmo salar Apolipoprotein C-I (apoc1), mRNA                                                       | Refseq_genes         | -        | -1.0 | 5.68E-03 | -7.8  | -        | 3.6   | -        | -1.7 |
| 291190593          | NM_001173915.1          | Salmo salar aquaporin 8 (aqp8), mRNA                                                               | Refseq_genes         | -        | 0.00 | -        | 1.9   | 6.99E-02 | up    | -        | 0.0  |
| 259155215          | NM_001165377.1          | Salmo salar Beta-adducin (addb), mRNA                                                              | Refseq_genes         | -        | -1.9 | -        | -2.1  | 6.99E-02 | -6.9  | -        | 1.9  |
| 213511949          | NM_001140737.1          | Salmo salar Bridging integrator 2 (bin2), mRNA                                                     | Refseq_genes         | -        | 0.00 | -        | 1.6   | 2.18E-02 | 7.2   | -        | up   |
| 185134143          | NM_001123580.1          | Salmo salar C type lectin receptor B (LOC100136447), mRNA                                          | Refseq_genes         | -        | down | -        | up    | -        | 0.0   | 9.06E-15 | down |
| 213512283          | NM_001140113.1          | Salmo salar Cadherin-17 (cad17), mRNA                                                              | Refseq_genes         | -        | 0.00 | 1.19E-08 | down  | 3.24E-07 | down  | -        | 0.0  |
| 213514195          | NM_001140522.1          | Salmo salar Cathepsin B (catb), mRNA                                                               | Refseq_genes         | -        | 0.00 | -        | 0.0   | 3.02E-02 | down  | -        | 0.0  |

|           |                |                                                                                                                                       |              |          |      |          |      |          |        |          |      |
|-----------|----------------|---------------------------------------------------------------------------------------------------------------------------------------|--------------|----------|------|----------|------|----------|--------|----------|------|
| 213514355 | NM_001140779.1 | Salmo salar Cathepsin M (catm), mRNA                                                                                                  | Refseq_genes | -        | -2.5 | -        | 1.5  | 1.34E-03 | 10.6   | -        | -1.0 |
| 226443385 | NM_001146421.1 | Salmo salar CK046 protein (ck046), mRNA                                                                                               | Refseq_genes | -        | down | -        | down | 6.99E-02 | down   | -        | down |
| 291190368 | NM_001173776.1 | Salmo salar Clarin-3 (clrn3), mRNA                                                                                                    | Refseq_genes | -        | 0.00 | 9.39E-03 | down | -        | 0.0    | -        | 0.0  |
| 10505157  | AF273013.1     | Salmo salar clone 01-04L immunoglobulin light chain precursor (IgL) mRNA, complete cds                                                | nt           | -        | 1.1  | -        | down | 1.79E-02 | -6.9   | -        | up   |
| 221221511 | BT057545.1     | Salmo salar clone ssal-evd-529-189 Zymogen granule membrane protein 16 precursor putative mRNA, complete cds                          | nt           | 3.43E-12 | down | -        | 0.0  | -        | 0.0    | -        | 0.0  |
| 209737133 | BT049635.1     | Salmo salar clone ssal-eve-504-024 39S ribosomal protein L41, mitochondrial precursor putative mRNA, complete cds                     | nt           | -        | -1.1 | 9.01E-02 | down | -        | -4.1   | -        | -1.5 |
| 209733395 | BT047766.1     | Salmo salar clone ssal-eve-517-354 Gamma-interferon-inducible lysosomal thiol reductase precursor putative mRNA, complete cds         | nt           | -        | down | 4.50E-08 | down | 2.85E-09 | down   | 7.68E-02 | down |
| 221220955 | BT057267.1     | Salmo salar clone ssal-eve-531-071 Non-histone chromosomal protein H6 putative mRNA, complete cds                                     | nt           | -        | -4.9 | 1.27E-03 | down | 2.73E-11 | -195.2 | -        | -4.1 |
| 209733843 | BT047990.1     | Salmo salar clone ssal-eve-544-022 Translationally-controlled tumor protein putative mRNA, complete cds                               | nt           | -        | -2.2 | -        | -4.0 | 1.96E-02 | -6.4   | -        | -3.9 |
| 221220457 | BT057018.1     | Salmo salar clone ssal-eve-547-356 Non-histone chromosomal protein H6 putative mRNA, complete cds                                     | nt           | -        | 0.00 | -        | down | 1.13E-09 | down   | -        | down |
| 209738407 | BT050272.1     | Salmo salar clone ssal-eve-560-145 Deoxyribonuclease gamma precursor putative mRNA, complete cds                                      | nt           | 7.51E-06 | down | -        | 0.0  | -        | 0.0    | -        | 0.0  |
| 221219843 | BT056711.1     | Salmo salar clone ssal-eve-566-360 High mobility group protein B2 putative mRNA, complete cds                                         | nt           | -        | down | -        | down | 5.65E-02 | down   | -        | down |
| 221219477 | BT056528.1     | Salmo salar clone ssal-eve-579-363 PRA1 family protein 3 putative mRNA, complete cds                                                  | nt           | -        | 0.00 | 2.87E-03 | down | 4.67E-03 | down   | -        | down |
| 209737953 | BT050045.1     | Salmo salar clone ssal-evf-502-345 Glyceraldehyde-3-phosphate dehydrogenase putative mRNA, complete cds                               | nt           | -        | down | 6.22E-03 | down | -        | down   | 2.26E-03 | down |
| 221220267 | BT056923.1     | Salmo salar clone ssal-evf-504-128 SRA stem-loop-interacting RNA-binding protein, mitochondrial precursor putative mRNA, complete cds | nt           | 3.75E-02 | up   | -        | up   | -        | up     | -        | 0.0  |
| 221221335 | BT057457.1     | Salmo salar clone ssal-evf-522-007 Vitamin D3 hydroxylase-associated protein putative mRNA, complete cds                              | nt           | -        | -2.0 | -        | 1.9  | 1.62E-03 | -14.2  | -        | 0.0  |
| 209731161 | BT046649.1     | Salmo salar clone ssal-evf-527-292 Mitochondrial 28S ribosomal protein S36 putative mRNA, complete cds                                | nt           | -        | 1.9  | 9.01E-02 | down | -        | -1.8   | -        | 3.1  |
| 221221243 | BT057411.1     | Salmo salar clone ssal-evf-550-301 Eukaryotic translation initiation factor 3 subunit C putative mRNA, complete cds                   | nt           | -        | down | -        | down | 1.18E-04 | down   | -        | down |

|           |            |                                                                                                                         |    |          |      |          |        |          |        |          |       |
|-----------|------------|-------------------------------------------------------------------------------------------------------------------------|----|----------|------|----------|--------|----------|--------|----------|-------|
| 221220085 | BT056832.1 | Salmo salar clone ssal-evf-554-043 Butyrophilin subfamily 1 member A1 precursor putative mRNA, complete cds             | nt | -        | -2.8 | -        | -4.4   | 8.30E-03 | -21.0  | -        | -1.3  |
| 303663498 | BT125368.1 | Salmo salar clone ssal-evf-563-255 C8orf40 homolog putative mRNA, complete cds                                          | nt | -        | down | -        | -4.9   | 6.99E-02 | down   | -        | 0.0   |
| 209734397 | BT048267.1 | Salmo salar clone ssal-plnb-004-066 Gastrotropin putative mRNA, complete cds                                            | nt | -        | down | 3.07E-10 | -273.9 | -        | up     | -        | up    |
| 221220663 | BT057121.1 | Salmo salar clone ssal-plnb-027-103 Lectin precursor putative mRNA, complete cds                                        | nt | -        | 0.00 | -        | -1.2   | -        | 4.1    | 1.18E-02 | -10.4 |
| 304376917 | BT050094.2 | Salmo salar clone ssal-plnb-506-126 Lipocalin precursor putative mRNA, complete cds                                     | nt | -        | -1.4 | 2.87E-03 | down   | 5.66E-03 | down   | -        | -3.2  |
| 209730649 | BT046393.1 | Salmo salar clone ssal-rgb2-549-178 Testosterone 17-beta-dehydrogenase 3 putative mRNA, complete cds                    | nt | -        | 0.00 | -        | 2.0    | -        | 5.2    | 1.07E-02 | -8.3  |
| 209738155 | BT050146.1 | Salmo salar clone ssal-rgb2-565-065 Endonuclease domain-containing 1 protein precursor putative mRNA, complete cds      | nt | 8.88E-02 | 27.2 | -        | 0.0    | -        | 0.0    | -        | 0.0   |
| 209735875 | BT049006.1 | Salmo salar clone ssal-rgb2-617-026 Nattectin precursor putative mRNA, complete cds                                     | nt | -        | 0.00 | 9.10E-07 | -49.4  | -        | 0.0    | -        | 0.0   |
| 209730271 | BT046204.1 | Salmo salar clone ssal-rgb2-641-117 Tetraspanin-8 putative mRNA, complete cds                                           | nt | 3.14E-04 | up   | -        | 0.0    | -        | -5.4   | 5.91E-02 | up    |
| 224587002 | BT071859.1 | Salmo salar clone ssal-rgf-002-348 Collagen alpha-3VI chain precursor putative mRNA, pseudogene cds                     | nt | 8.00E-03 | down | -        | -1.5   | 8.30E-03 | -22.0  | -        | up    |
| 209148888 | BT044698.1 | Salmo salar clone ssal-rgf-501-044 BCL2/adenovirus E1B 19 kDa protein-interacting protein 3 putative mRNA, complete cds | nt | -        | 0.00 | 4.41E-02 | up     | -        | down   | -        | 0.0   |
| 224587036 | BT071893.1 | Salmo salar clone ssal-rgf-502-231 unknown large open reading frame mRNA, novel cds                                     | nt | -        | -1.1 | -        | -1.7   | 4.44E-02 | -5.7   | -        | -1.3  |
| 224587090 | BT071953.1 | Salmo salar clone ssal-rgf-504-369, novel cds                                                                           | nt | -        | down | -        | down   | 6.38E-08 | down   | -        | 0.0   |
| 223647599 | BT058845.1 | Salmo salar clone ssal-rgf-507-102 Actin-related protein 2-A putative mRNA, complete cds                                | nt | 3.75E-02 | down | -        | up     | -        | -2.9   | -        | 0.0   |
| 209154129 | BT045035.1 | Salmo salar clone ssal-rgf-510-148 Ubiquitin-conjugating enzyme E2 D2 putative mRNA, complete cds                       | nt | -        | down | -        | -5.4   | 3.65E-02 | down   | -        | down  |
| 223647861 | BT058976.1 | Salmo salar clone ssal-rgf-517-215 Stromal cell-derived factor 1 precursor putative mRNA, complete cds                  | nt | -        | -1.9 | -        | down   | 8.02E-14 | -312.0 | -        | 4.7   |
| 223647865 | BT058978.1 | Salmo salar clone ssal-rgf-517-265 Actin-related protein 2-A putative mRNA, complete cds                                | nt | -        | -1.3 | -        | -1.3   | 3.02E-02 | -11.7  | -        | down  |
| 224587384 | BT072238.1 | Salmo salar clone ssal-rgf-517-384 unknown large open reading frame mRNA, novel cds                                     | nt | -        | -1.6 | 6.21E-08 | -121.6 | 9.52E-03 | -8.0   | -        | -5.4  |
| 224587388 | BT072243.1 | Salmo salar clone ssal-rgf-518-093 Proto-oncogene vav putative mRNA, pseudogene cds                                     | nt | -        | 0.00 | -        | 0.0    | 1.91E-06 | down   | -        | -1.2  |
| 224587400 | BT072256.1 | Salmo salar clone ssal-rgf-518-306 Myosin-9 putative mRNA, pseudogene cds                                               | nt | -        | down | -        | down   | 8.79E-02 | down   | -        | 0.0   |

|           |                |                                                                                                         |              |          |       |          |       |          |       |          |      |
|-----------|----------------|---------------------------------------------------------------------------------------------------------|--------------|----------|-------|----------|-------|----------|-------|----------|------|
| 224587424 | BT072278.1     | Salmo salar clone ssal-rgf-519-255 Ubiquitin-conjugating enzyme E2 L3 putative mRNA, partial cds        | nt           | -        | 1.2   | -        | 3.7   | 8.09E-06 | up    | 8.31E-04 | up   |
| 209154931 | BT045436.1     | Salmo salar clone ssal-rgf-521-193 B-cell receptor-associated protein 31 putative mRNA, complete cds    | nt           | -        | 0.00  | 1.19E-02 | down  | -        | 0.0   | -        | up   |
| 224587488 | BT072334.1     | Salmo salar clone ssal-rgf-521-227 unknown large open reading frame mRNA, novel cds                     | nt           | 7.32E-02 | up    | -        | -6.3  | -        | 1.4   | -        | 1.1  |
| 223649215 | BT059653.1     | Salmo salar clone ssal-rgf-521-267 Tripartite motif-containing protein 25 putative mRNA, complete cds   | nt           | -        | -2.0  | -        | -2.2  | 4.73E-02 | -7.3  | -        | -5.9 |
| 224587510 | BT072359.1     | Salmo salar clone ssal-rgf-522-242 Biotin--protein ligase putative mRNA, pseudogene cds                 | nt           | 3.75E-02 | up    | -        | -1.8  | -        | -1.7  | -        | 0.0  |
| 209155099 | BT045520.1     | Salmo salar clone ssal-rgf-523-374 max putative mRNA, complete cds                                      | nt           | -        | 0.00  | -        | down  | 2.77E-03 | down  | -        | 0.0  |
| 209155209 | BT045575.1     | Salmo salar clone ssal-rgf-525-166 Histone chaperone asf1-B putative mRNA, complete cds                 | nt           | -        | 4.1   | -        | 3.7   | 3.02E-02 | down  | -        | -1.8 |
| 224613399 | BT072448.1     | Salmo salar clone ssal-rgf-525-359 Transketolase-like protein 2 putative mRNA, partial cds              | nt           | -        | 1.1   | -        | 1.1   | 5.65E-02 | -5.1  | -        | 1.1  |
| 224613403 | BT072459.1     | Salmo salar clone ssal-rgf-526-138 Fructose-1,6-bisphosphatase 1 putative mRNA, partial cds             | nt           | -        | down  | -        | down  | 9.71E-10 | down  | -        | down |
| 224587622 | BT072484.1     | Salmo salar clone ssal-rgf-527-126 unknown large open reading frame mRNA, novel cds                     | nt           | -        | down  | -        | down  | 3.24E-03 | down  | -        | down |
| 224587648 | BT072508.1     | Salmo salar clone ssal-rgf-528-100 Poly polymerase 14 putative mRNA, pseudogene cds                     | nt           | 1.58E-03 | -29.2 | -        | -5.3  | 4.41E-02 | -7.8  | -        | -2.2 |
| 223649117 | BT059604.1     | Salmo salar clone ssal-rgf-532-019 Actin, cytoplasmic 1 putative mRNA, complete cds                     | nt           | -        | -2.5  | -        | -19.7 | 7.77E-04 | -31.8 | -        | down |
| 223648461 | BT059276.1     | Salmo salar clone ssal-rgf-538-059 F-box/LRR-repeat protein 5 putative mRNA, complete cds               | nt           | -        | 0.00  | -        | down  | 7.67E-02 | -14.6 | -        | down |
| 209156037 | BT045989.1     | Salmo salar clone ssal-rgf-538-237 Serine/threonine-protein kinase MST4 putative mRNA, complete cds     | nt           | -        | 0.00  | -        | 0.0   | 4.16E-06 | down  | -        | down |
| 224587895 | BT072767.1     | Salmo salar clone ssal-rgf-539-307 Ras GTPase-activating-like protein IQGAP1 putative mRNA, partial cds | nt           | -        | 1.4   | -        | -2.0  | 5.91E-03 | -9.9  | -        | 0.0  |
| 224587922 | BT072796.1     | Salmo salar clone ssal-rgf-541-083 unknown large open reading frame mRNA, novel cds                     | nt           | -        | -1.2  | -        | 1.4   | 8.79E-02 | up    | -        | 0.0  |
| 223672306 | BT059975.1     | Salmo salar clone ssal-rgg-514-084 Ig kappa chain V-IV region B17 precursor putative mRNA, complete cds | nt           | -        | down  | -        | up    | 8.79E-02 | -5.4  | -        | 0.0  |
| 223672718 | BT060181.1     | Salmo salar clone ssal-rgh-507-311 Ig kappa chain V region K29-213 putative mRNA, complete cds          | nt           | -        | down  | -        | down  | 1.50E-04 | down  | -        | -1.1 |
| 291190370 | NM_001173637.1 | Salmo salar Clusterin (clus), mRNA                                                                      | Refseq_genes | -        | down  | -        | down  | 4.05E-05 | down  | -        | down |
| 213513351 | NM_001141001.1 | Salmo salar COMM domain-containing protein 9 (comd9), mRNA                                              | Refseq_genes | -        | down  | -        | down  | 1.07E-03 | down  | -        | down |

|           |                |                                                                                                                                                                                                                                                                |              |          |       |          |        |          |        |          |       |
|-----------|----------------|----------------------------------------------------------------------------------------------------------------------------------------------------------------------------------------------------------------------------------------------------------------|--------------|----------|-------|----------|--------|----------|--------|----------|-------|
| 291190431 | NM_001173900.1 | Salmo salar complement component 1, q subcomponent, B chain (c1qb), mRNA                                                                                                                                                                                       | Refseq_genes | -        | -5.1  | -        | -4.1   | 6.97E-02 | -4.9   | -        | -8.7  |
| 226442587 | NM_001146430.1 | Salmo salar Complement component C8 gamma chain (co8g), mRNA                                                                                                                                                                                                   | Refseq_genes | -        | -1.1  | -        | 2.5    | 4.44E-02 | 8.0    | -        | -1.4  |
| 226443114 | NM_001146569.1 | Salmo salar CU070 protein (cu070), mRNA                                                                                                                                                                                                                        | Refseq_genes | -        | 3.4   | -        | -1.7   | 6.04E-02 | -18.4  | -        | -1.2  |
| 213512792 | NM_001140055.1 | Salmo salar Dual specificity protein kinase CLK4 (clk4), mRNA                                                                                                                                                                                                  | Refseq_genes | -        | down  | 8.39E-02 | -6.7   | -        | 1.1    | -        | -1.9  |
| 185133694 | NM_001123697.1 | Salmo salar eggshell protein (LOC100136930), mRNA                                                                                                                                                                                                              | Refseq_genes | -        | 0.00  | -        | 0.0    | -        | 0.0    | 7.25E-10 | 131.5 |
| 213512966 | NM_001139774.1 | Salmo salar Epidermis-type lipoxigenase 3 (loxe3), mRNA                                                                                                                                                                                                        | Refseq_genes | 1.24E-02 | 8.6   | -        | -1.4   | -        | up     | -        | 0.0   |
| 194396635 | EU643669.1     | Salmo salar haplotype Hap_2 NADH dehydrogenase subunit 5 (NADH-5) gene, partial cds; mitochondrial                                                                                                                                                             | nt           | -        | down  | 9.01E-02 | down   | 3.65E-02 | down   | 7.28E-04 | -56.2 |
| 213512932 | NM_001140849.1 | Salmo salar Hecpcidin-1 (hepc1), mRNA                                                                                                                                                                                                                          | Refseq_genes | -        | down  | -        | -2.0   | -        | -14.6  | 6.72E-02 | -5.2  |
| 158702273 | EU025707.1     | Salmo salar homeobox protein HoxB13ab (HoxB13ab), homeobox protein HoxB10ab (HoxB10ab), homeobox protein HoxB9ab (HoxB9ab), homeobox protien HoxB8ab (HoxB8ab), homeobox protien HoxB7ab (HoxB7ab), homeobox protien HoxB6ab (HoxB6ab), homeobox protien H ... | nt           | -        | 1.0   | -        | -1.1   | -        | -1.5   | 6.25E-04 | -11.5 |
| 213513791 | NM_001140121.1 | Salmo salar immediate early response 2 (ier2), mRNA                                                                                                                                                                                                            | Refseq_genes | -        | -1.0  | -        | 1.1    | 6.49E-05 | up     | -        | 1.4   |
| 259155205 | NM_001165372.1 | Salmo salar Inosine-5-monophosphate dehydrogenase 1 (imd1), mRNA                                                                                                                                                                                               | Refseq_genes | -        | up    | 3.54E-02 | down   | -        | -1.8   | -        | up    |
| 356640272 | NM_001252361.1 | Salmo salar interferon regulatory factor 1 (irf1), mRNA                                                                                                                                                                                                        | Refseq_genes | -        | down  | -        | -1.6   | 9.04E-04 | -472.8 | -        | down  |
| 213514485 | NM_001140576.1 | Salmo salar Leukocyte surface antigen CD53 (cd53), mRNA                                                                                                                                                                                                        | Refseq_genes | -        | up    | -        | -2.3   | 8.30E-03 | down   | -        | 0.0   |
| 218931109 | NM_001140986.1 | Salmo salar Mannose-specific lectin (asal), mRNA                                                                                                                                                                                                               | Refseq_genes | 2.16E-05 | 29.6  | -        | -2.7   | -        | down   | -        | down  |
| 213512998 | NM_001140457.1 | Salmo salar matrix metalloproteinase 9 (mmp9), mRNA                                                                                                                                                                                                            | Refseq_genes | -        | 1.2   | -        | down   | 4.41E-02 | -12.4  | -        | -2.2  |
| 185132565 | NM_001123669.1 | Salmo salar metallothionein B (LOC100136581), mRNA                                                                                                                                                                                                             | Refseq_genes | 9.37E-03 | 8.2   | 6.22E-03 | 7.7    | -        | 2.7    | 4.46E-02 | 5.6   |
| 25573079  | AF504023.1     | Salmo salar MHC class I (UBA) mRNA, UBA*0201 allele, partial cds                                                                                                                                                                                               | nt           | 2.19E-08 | down  | 7.25E-07 | -142.8 | 7.44E-06 | down   | -        | down  |
| 363548533 | JN897012.1     | Salmo salar MHC class I antigen (UBA) mRNA, UBA*4001 allele, complete cds                                                                                                                                                                                      | nt           | -        | down  | 1.84E-02 | down   | -        | down   | -        | down  |
| 378554505 | JQ390056.1     | Salmo salar mitochondrion, complete genome                                                                                                                                                                                                                     | nt           | 5.37E-03 | -11.4 | 2.37E-05 | -22.9  | 7.44E-06 | -23.7  | 2.60E-08 | -57.1 |
| 3775976   | u12143.1       | Salmo salar mitochondrion, complete genome                                                                                                                                                                                                                     | nt           | 1.51E-06 | down  | 1.38E-08 | down   | 3.07E-11 | down   | 4.47E-12 | down  |
| 259155233 | NM_001165386.1 | Salmo salar myotrophin (mtpn), mRNA                                                                                                                                                                                                                            | Refseq_genes | -        | -1.9  | -        | down   | 7.89E-04 | down   | -        | down  |
| 259155169 | NM_001165355.1 | Salmo salar nuclear receptor coactivator 4                                                                                                                                                                                                                     | Refseq_genes | -        | -1.2  | -        | 1.2    | -        | 1.2    | 3.97E-02 | 7.0   |

|           |                |                                                                                        |              |          |   |       |          |       |          |       |          |  |  |  |  |  |  |  |  |  |  |       |
|-----------|----------------|----------------------------------------------------------------------------------------|--------------|----------|---|-------|----------|-------|----------|-------|----------|--|--|--|--|--|--|--|--|--|--|-------|
|           |                | (ncoa4), mRNA                                                                          |              |          |   |       |          |       |          |       |          |  |  |  |  |  |  |  |  |  |  |       |
| 226443008 | NM_001146539.1 | Salmo salar Nucleoplasmin-like protein NO29 (no29), mRNA                               | Refseq_genes |          | - | 0.00  | -        | down  | 1.04E-02 | down  | -        |  |  |  |  |  |  |  |  |  |  | 0.0   |
| 329130751 | HM133629.1     | Salmo salar olfactory receptor family C subfamily 2 member 1 gene, complete cds        | nt           |          | - | 0.00  | -        | 0.0   | -        | 0.0   | 4.61E-02 |  |  |  |  |  |  |  |  |  |  | -8.4  |
| 329130737 | HM133622.1     | Salmo salar olfactory receptor family C subfamily 4 member 11 gene, complete cds       | nt           |          | - | -7.6  | -        | -3.4  | 6.47E-04 | -16.4 | -        |  |  |  |  |  |  |  |  |  |  | -5.8  |
| 213514523 | NM_001140090.1 | Salmo salar PDZ domain-containing protein 1 (pdzd1), mRNA                              | Refseq_genes |          | - | 0.00  | 7.73E-07 | down  | 2.75E-04 | down  | -        |  |  |  |  |  |  |  |  |  |  | 0.0   |
| 304555577 | NM_001195198.1 | Salmo salar Phospholemman (plm), mRNA                                                  | Refseq_genes |          | - | down  | 6.16E-05 | down  | 6.99E-02 | down  | -        |  |  |  |  |  |  |  |  |  |  | down  |
| 213513391 | NM_001140288.1 | Salmo salar Polypyrimidine tract-binding protein 1 (ptbp1), mRNA                       | Refseq_genes |          | - | -4.3  | 3.54E-02 | down  | 8.25E-07 | down  | -        |  |  |  |  |  |  |  |  |  |  | down  |
| 226443419 | NM_001146429.1 | Salmo salar Proheparin-binding EGF-like growth factor (hbegf), mRNA                    | Refseq_genes |          | - | down  | -        | up    | 1.96E-02 | down  | -        |  |  |  |  |  |  |  |  |  |  | 0.0   |
| 213513082 | NM_001141336.1 | Salmo salar Pyrroline-5-carboxylate reductase 2 (p5cr2), mRNA                          | Refseq_genes |          | - | 1.4   | -        | 3.0   | -        | -1.6  | 1.31E-03 |  |  |  |  |  |  |  |  |  |  | 13.0  |
| 226443273 | NM_001146626.1 | Salmo salar Ran-binding protein 10 (rbp10), mRNA                                       | Refseq_genes |          | - | 1.2   | -        | 0.0   | -        | 2.2   | 9.95E-02 |  |  |  |  |  |  |  |  |  |  | 9.0   |
| 213512635 | NM_001140741.1 | Salmo salar Rhamnose-binding lectin (sal), mRNA                                        | Refseq_genes |          | - | 2.0   | 2.06E-02 | 6.9   | -        | up    | -        |  |  |  |  |  |  |  |  |  |  | 0.0   |
| 213514719 | NM_001141345.1 | Salmo salar S100-A16 (s10ag), mRNA                                                     | Refseq_genes |          | - | -3.0  | 2.29E-02 | down  | -        | up    | -        |  |  |  |  |  |  |  |  |  |  | 0.0   |
| 213515517 | NM_001140898.1 | Salmo salar Sclerostin domain-containing protein 1 (sosl1), mRNA                       | Refseq_genes |          | - | -13.5 | -        | 1.5   | 4.39E-02 | -15.2 | -        |  |  |  |  |  |  |  |  |  |  | -1.1  |
| 213512394 | NM_001141358.1 | Salmo salar SCO4629 (y4629), mRNA                                                      | Refseq_genes | 9.61E-03 |   | down  | -        | -1.1  | -        | -1.1  | -        |  |  |  |  |  |  |  |  |  |  | 0.0   |
| 291190832 | NM_001173937.1 | Salmo salar Selenide, water dikinase 1 (sps1), mRNA                                    | Refseq_genes |          | - | 1.7   | -        | -2.1  | 5.28E-02 | -6.4  | -        |  |  |  |  |  |  |  |  |  |  | 3.6   |
| 185133566 | NM_001123692.1 | Salmo salar serum albumin 2 (LOC100136922), mRNA                                       | Refseq_genes |          | - | 1.0   | 1.03E-03 | -13.4 | -        | -1.6  | -        |  |  |  |  |  |  |  |  |  |  | -1.5  |
| 185133997 | NM_001123569.1 | Salmo salar serum lectin isoform 1 precursor (LOC100136435), mRNA                      | Refseq_genes |          | - | up    | -        | -1.1  | 1.98E-02 | 6.7   | -        |  |  |  |  |  |  |  |  |  |  | up    |
| 213514919 | NM_001141637.1 | Salmo salar Sporozoite surface protein 2 (ssp2), mRNA                                  | Refseq_genes |          | - | -4.2  | 8.47E-02 | -7.3  | 3.98E-02 | -6.6  | 2.27E-02 |  |  |  |  |  |  |  |  |  |  | -25.6 |
| 213513389 | NM_001140261.1 | Salmo salar Transcobalamin-2 (tco2), mRNA                                              | Refseq_genes |          | - | -9.4  | -        | -1.1  | 8.45E-06 | down  | -        |  |  |  |  |  |  |  |  |  |  | 1.2   |
| 291190285 | NM_001173882.1 | Salmo salar Tropomodulin-3 (tmod3), mRNA                                               | Refseq_genes |          | - | 0.00  | -        | 0.0   | 6.84E-03 | down  | -        |  |  |  |  |  |  |  |  |  |  | up    |
| 185135858 | NM_001123711.1 | Salmo salar trypsin IA (trp-ia), mRNA                                                  | Refseq_genes |          | - | 0.00  | 2.24E-04 | down  | -        | 0.0   | -        |  |  |  |  |  |  |  |  |  |  | 0.0   |
| 213514129 | NM_001139633.1 | Salmo salar upstream transcription factor 1 (usf1), mRNA                               | Refseq_genes |          | - | down  | -        | 1.0   | 3.02E-02 | down  | -        |  |  |  |  |  |  |  |  |  |  | down  |
| 185135317 | NM_001123588.1 | Salmo salar zonadhesin-like (LOC100136455), mRNA                                       | Refseq_genes |          | - | up    | 1.95E-04 | -17.0 | -        | 4.6   | -        |  |  |  |  |  |  |  |  |  |  | 2.0   |
| 7769634   | AF228581.1     | Salmo trutta IgM-B heavy chain constant region mRNA, partial cds                       | nt           |          | - | 3.0   | 9.01E-02 | up    | -        | -1.4  | -        |  |  |  |  |  |  |  |  |  |  | 1.7   |
| 164510790 | AM262766.1     | Salmo trutta partial mRNA for MHC class I heavy chain, Satr-UBA*2801 allele (uba gene) | nt           | 6.67E-04 |   | down  | 2.07E-03 | down  | -        | 0.0   | -        |  |  |  |  |  |  |  |  |  |  | down  |

|                    |                         |                                                                                                    |                      |          |      |          |       |          |       |          |        |
|--------------------|-------------------------|----------------------------------------------------------------------------------------------------|----------------------|----------|------|----------|-------|----------|-------|----------|--------|
| 4102912            | AF017232.1              | Salvelinus namaycush transposon Tsn1-3 transposase (Tsn1) pseudogene, complete sequence            | nt                   | -        | -1.6 | 7.27E-02 | down  | -        | -1.4  | -        | 1.1    |
| ENSGACG0000001474  | <i>sar1b</i>            | SAR1 homolog B ( <i>S. cerevisiae</i> )                                                            | Ensembl_stickleback  | -        | -4.8 | -        | 0.0   | 1.60E-02 | -37.0 | -        | -3.6   |
| ENSDARG00000069983 | CU929159.1              | scinderin like a                                                                                   | Ensembl_zebrafish    | -        | -1.1 | -        | -1.8  | 1.31E-05 | down  | -        | 2.0    |
| ENSGACG00000016757 | <i>sec24b</i>           | SEC24 family, member B ( <i>S. cerevisiae</i> )                                                    | Ensembl_stickleback  | -        | -1.1 | -        | down  | 9.04E-04 | down  | -        | -1.4   |
| ENSGACG00000000830 | <i>sec61a1 (2 of 2)</i> | Sec61 alpha 1 subunit ( <i>S. cerevisiae</i> )                                                     | Ensembl_stickleback  | -        | 1.5  | -        | -1.2  | 6.84E-03 | down  | -        | 1.2    |
| ENSDARG00000090286 | <i>serpina1</i>         | serine (or cysteine) proteinase inhibitor, clade A (alpha-1 antiproteinase, antitrypsin), member 1 | Ensembl_zebrafish    | -        | 2.4  | 6.39E-03 | -15.7 | -        | -1.4  | -        | -1.7   |
| ENSDARG00000021208 | <i>serpind1</i>         | serine (or cysteine) proteinase inhibitor, clade D (heparin cofactor), member 1                    | Ensembl_zebrafish    | -        | 2.3  | 7.81E-02 | -23.2 | -        | -3.2  | -        | -1.4   |
| ENSGACG00000007719 | <i>serinc2 (1 of 2)</i> | serine incorporator 2                                                                              | Ensembl_stickleback  | -        | down | -        | down  | 1.28E-02 | down  | -        | down   |
| ENSGACG00000007834 | <i>srsf5</i>            | serine/arginine-rich splicing factor 5                                                             | Ensembl_stickleback  | -        | -1.9 | -        | -3.0  | 1.77E-03 | 27.3  | -        | -2.2   |
| ENSORLG00000016512 | LOC100144362            | serotransferrin precursor                                                                          | Ensembl_medaka       | -        | -1.1 | 1.67E-02 | -8.5  | 1.81E-03 | -11.6 | -        | 1.3    |
| ENSGACG00000010973 | <i>sgk1</i>             | serum/glucocorticoid regulated kinase 1                                                            | Ensembl_stickleback  | -        | 2.2  | -        | -4.1  | -        | 0.0   | 4.42E-20 | -862.7 |
| ENSONIG00000011932 | <i>sbf1</i>             | SET binding factor 1                                                                               | Ensembl_nile_tilapia | -        | down | -        | down  | 5.07E-02 | -28.3 | -        | -2.1   |
| ENSGACG00000014971 | <i>sdr42e1</i>          | short chain dehydrogenase/reductase family 42E, member 1                                           | Ensembl_stickleback  | 2.42E-03 | up   | -        | 1.3   | -        | 0.0   | -        | 0.0    |
| ENSDARG00000095304 | si:ch211-207c6.2        | si:ch211- 207c6.2                                                                                  | Ensembl_zebrafish    | -        | -3.8 | -        | 0.0   | 4.41E-02 | -12.4 | -        | up     |
| ENSDARG00000073742 | si:ch73-103b2.3         | si:ch73- 103b2.3                                                                                   | Ensembl_zebrafish    | -        | 0.00 | 4.50E-08 | -38.7 | -        | up    | -        | -2.8   |
| ENSDARG00000093374 | si:ch73-18b11.1         | si:ch73- 18b11.1                                                                                   | Ensembl_zebrafish    | -        | down | -        | 2.8   | 3.65E-02 | down  | -        | -1.0   |
| ENSDARG00000058719 | si:dkey-119f1.1         | si:dkey-119f1.1                                                                                    | Ensembl_zebrafish    | -        | -3.6 | -        | 1.0   | -        | -2.8  | 1.00E-02 | 16.4   |
| ENSDARG00000060325 | si:dkey-179j5.2         | si:dkey-179j5.2                                                                                    | Ensembl_zebrafish    | -        | 0.00 | -        | 0.0   | -        | up    | 1.18E-10 | up     |
| ENSDARG00000094929 | si:dkey-7f3.15          | si:dkey-7f3.15                                                                                     | Ensembl_zebrafish    | -        | down | -        | 1.6   | -        | up    | 4.66E-06 | 42.9   |
| ENSDARG00000068515 | si:zfos-1762d12.1       | si:zfos- 1762d12.1                                                                                 | Ensembl_zebrafish    | -        | -1.5 | -        | 1.5   | 4.52E-02 | 8.3   | -        | 1.6    |
| ENSGACG00000002914 | <i>neu1</i>             | sialidase 1 (lysosomal sialidase)                                                                  | Ensembl_stickleback  | -        | up   | 1.58E-02 | -32.8 | -        | up    | -        | up     |
| ENSGACG00000016749 | <i>srp72</i>            | signal recognition particle 72kDa                                                                  | Ensembl_stickleback  | -        | 1.6  | -        | up    | 3.65E-02 | up    | -        | up     |
| ENSORLG00000006430 | <i>srprb</i>            | signal recognition particle receptor, B subunit                                                    | Ensembl_medaka       | -        | 1.0  | 9.01E-02 | up    | -        | 0.0   | -        | 1.3    |
| ENSONIG00000012851 | <i>sin3a (1 of 2)</i>   | SIN3 transcription regulator homolog A (yeast)                                                     | Ensembl_nile_tilapia | -        | 0.00 | -        | down  | 4.67E-03 | down  | -        | up     |
| ENSGACG00000008432 | <i>six1</i>             | SIX homeobox 1                                                                                     | Ensembl_stickleback  | -        | 3.6  | -        | -1.1  | 8.79E-02 | -97.0 | -        | 3.2    |
| ENSDARG00000052578 | <i>c6ast4</i>           | six-cysteine containing astacin protease 4                                                         | Ensembl_zebrafish    | -        | 0.00 | 2.12E-06 | -23.4 | -        | 0.0   | -        | down   |
| BQ036199           | gb BQ036199.1           | SL3-0294 Atlantic Salmon liver SSH Salmo salar cDNA clone SL3-0294, mRNA sequence.                 | EST_others           | -        | down | -        | 0.0   | -        | 0.0   | 2.57E-15 | down   |
| ENSGACG00000016411 | <i>slit3</i>            | slit homolog 3 ( <i>Drosophila</i> )                                                               | Ensembl_stickleback  | -        | 0.00 | -        | down  | 5.51E-02 | -8.9  | -        | up     |

|                    |                          |                                                                                                                |                      |          |       |          |       |          |       |          |      |
|--------------------|--------------------------|----------------------------------------------------------------------------------------------------------------|----------------------|----------|-------|----------|-------|----------|-------|----------|------|
| ENSDARG00000071430 | <i>smyhc1</i>            | slow myosin heavy chain 1                                                                                      | Ensembl_zebrafish    | 2.44E-03 | -27.0 | -        | 1.6   | -        | -1.5  | -        | 0.0  |
| ENSGACG00000015581 | <i>sumo1</i>             | SMT3 suppressor of mif two 3 homolog 1 (S. cerevisiae)                                                         | Ensembl_stickleback  | -        | -1.1  | -        | -3.6  | 2.24E-02 | -14.4 | -        | 1.2  |
| DW592332           | gb DW592332.1            | smus1-016AE03.g1_#0016.0 DIAS_SMUS Salmo salar cDNA 5', mRNA sequence.                                         | EST_others           | -        | 4.1   | -        | -1.3  | 3.65E-02 | up    | -        | up   |
| ENSONIG00000004201 | <i>slc12a9</i>           | solute carrier family 12 (potassium/chloride transporters), member 9                                           | Ensembl_nile_tilapia | -        | 1.6   | -        | 13.6  | 3.67E-05 | down  | -        | -1.3 |
| ENSDARG00000013855 | <i>slc12a3</i>           | solute carrier family 12 (sodium/chloride transporters), member 3                                              | Ensembl_zebrafish    | -        | 1.3   | -        | 1.3   | 7.27E-02 | 4.8   | -        | up   |
| ENSGACG00000007935 | <i>slc16a4</i>           | solute carrier family 16, member 4 (monocarboxylic acid transporter 5)                                         | Ensembl_stickleback  | -        | 0.00  | 1.49E-02 | down  | 1.42E-03 | down  | -        | down |
| ENSGACG00000010985 | <i>slc2a2</i>            | solute carrier family 2 (facilitated glucose transporter), member 2                                            | Ensembl_stickleback  | -        | up    | -        | -1.5  | -        | 1.6   | 8.09E-02 | -7.9 |
| ENSGACG00000019384 | <i>slc2a4</i>            | solute carrier family 2 (facilitated glucose transporter), member 4                                            | Ensembl_stickleback  | -        | down  | 5.07E-03 | -39.2 | 8.60E-08 | down  | -        | down |
| ENSONIG00000013596 | <i>slc24a6</i>           | solute carrier family 24 (sodium/lithium/calcium exchanger), member 6                                          | Ensembl_nile_tilapia | -        | 1.9   | -        | -1.3  | 1.68E-03 | down  | 5.91E-02 | down |
| ENSGACG00000015473 | <i>slc25a36 (2 of 2)</i> | solute carrier family 25 (pyrimidine nucleotide carrier), member 36                                            | Ensembl_stickleback  | -        | up    | -        | up    | -        | -28.1 | 5.61E-03 | up   |
| ENSGACG00000005439 | <i>slc35e2b</i>          | solute carrier family 35, member E2B                                                                           | Ensembl_stickleback  | -        | -1.1  | -        | 12.6  | 1.96E-03 | -19.2 | -        | down |
| ENSGACG00000016873 | <i>slc39a2</i>           | solute carrier family 39 (zinc transporter), member 2                                                          | Ensembl_stickleback  | -        | -1.6  | -        | down  | 8.30E-03 | -18.4 | -        | 0.0  |
| ENSGACG00000007949 | <i>slc48a1</i>           | solute carrier family 48 (heme transporter), member 1                                                          | Ensembl_stickleback  | -        | -1.8  | -        | -4.6  | 1.08E-03 | -29.6 | -        | 3.7  |
| ENSGACG00000004673 | <i>snx5</i>              | sorting nexin 5                                                                                                | Ensembl_stickleback  | -        | up    | -        | 0.0   | 5.84E-02 | -7.9  | -        | down |
| ENSGACG00000006733 | <i>spc24</i>             | SPC24, NDC80 kinetochore complex component, homolog (S. cerevisiae)                                            | Ensembl_stickleback  | -        | 0.00  | -        | 0.0   | 4.50E-02 | -10.5 | -        | up   |
| ENSGACG00000020699 | <i>spag7</i>             | sperm associated antigen 7                                                                                     | Ensembl_stickleback  | -        | 1.1   | -        | -1.9  | 8.67E-02 | -7.6  | -        | 1.1  |
| ENSGACG00000013537 | <i>s1pr1</i>             | sphingosine-1-phosphate receptor 1                                                                             | Ensembl_stickleback  | -        | 2.1   | -        | -1.2  | 1.85E-07 | up    | -        | -1.2 |
| ENSGACG00000008317 | <i>skap2</i>             | src kinase associated phosphoprotein 2                                                                         | Ensembl_stickleback  | 3.75E-02 | down  | -        | 1.9   | -        | -1.1  | -        | down |
| ENSGACG00000011185 | <i>sox9 (2 of 2)</i>     | SRY (sex determining region Y)-box 9                                                                           | Ensembl_stickleback  | -        | 0.00  | -        | 4.1   | 1.96E-02 | up    | -        | -3.3 |
| ENSGACG00000016008 | <i>st6galnac6</i>        | ST6 (alpha-N-acetyl-neuraminyl-2,3-beta-galactosyl-1, 3)-N-acetylgalactosaminide alpha-2,6-sialyltransferase 6 | Ensembl_stickleback  | -        | -1.4  | -        | 1.3   | 5.07E-02 | -9.0  | -        | -1.1 |
| ENSORLG00000018292 | <i>stab2</i>             | stabilin 2                                                                                                     | Ensembl_medaka       | -        | -1.1  | -        | 3.7   | -        | -1.2  | 9.95E-02 | 12.2 |
| ENSORLG00000000328 | <i>stc1 (2 of 2)</i>     | stanniocalcin 1                                                                                                | Ensembl_medaka       | -        | down  | -        | up    | 2.36E-18 | down  | -        | 0.0  |
| ENSDARG00000058476 | <i>stc1l</i>             | stanniocalcin 1, like                                                                                          | Ensembl_zebrafish    | -        | down  | -        | up    | 2.30E-12 | down  | -        | 0.0  |
| ENSDARG00000033662 | <i>scd</i>               | stearoyl-CoA desaturase (delta-9-desaturase)                                                                   | Ensembl_zebrafish    | -        | 1.2   | -        | 3.5   | -        | 1.0   | 8.55E-10 | 54.2 |
| ENSDARG00000024026 | <i>sdf2</i>              | stromal cell-derived factor 2                                                                                  | Ensembl_zebrafish    | -        | -1.2  | -        | 1.3   | -        | 1.8   | 5.55E-02 | 5.5  |
| ENSGACG00000020581 | <i>sod1</i>              | superoxide dismutase 1, soluble                                                                                | Ensembl_stickleback  | 1.15E-02 | down  | 6.61E-04 | down  | 2.28E-03 | down  | 1.89E-03 | down |



|                    |                         |                                                                                                   |                      |          |       |          |       |          |       |          |      |
|--------------------|-------------------------|---------------------------------------------------------------------------------------------------|----------------------|----------|-------|----------|-------|----------|-------|----------|------|
| ENSGACG00000013091 | <i>st14 (1 of 3)</i>    | suppression of tumorigenicity 14 (colon carcinoma)                                                | Ensembl_stickleback  | 6.09E-02 | 29.6  | -        | -1.3  | 1.96E-02 | 30.7  | -        | 0.0  |
| ENSGACG00000006093 | <i>st7l</i>             | suppression of tumorigenicity 7 like                                                              | Ensembl_stickleback  | -        | 0.00  | 2.62E-05 | -33.1 | -        | 0.0   | -        | up   |
| ENSGACG00000016739 | <i>sapcd2</i>           | suppressor APC domain containing 2                                                                | Ensembl_stickleback  | -        | -1.9  | 4.41E-02 | 25.0  | -        | -1.3  | -        | -1.1 |
| ENSGACG00000007257 | <i>sufu</i>             | suppressor of fused homolog (Drosophila)                                                          | Ensembl_stickleback  | -        | down  | -        | down  | 3.65E-02 | down  | -        | up   |
| ENSGACG00000013526 | <i>suv420h2</i>         | suppressor of variegation 4-20 homolog 2 (Drosophila)                                             | Ensembl_stickleback  | -        | up    | -        | down  | 6.99E-02 | down  | -        | up   |
| ENSGACG00000012650 | <i>smarcc1 (1 of 2)</i> | SWI/SNF related, matrix associated, actin dependent regulator of chromatin, subfamily c, member 1 | Ensembl_stickleback  | -        | 0.00  | 2.29E-02 | up    | -        | down  | -        | 2.1  |
| ENSGACG00000003136 | <i>syt11</i>            | synaptotagmin XI                                                                                  | Ensembl_stickleback  | -        | -1.0  | 8.90E-08 | down  | -        | -2.8  | -        | -1.3 |
| 288548571          | GU569096.1              | Taenia pisiformis mitochondrion, complete genome                                                  | nt                   | -        | 0.00  | 6.59E-03 | 8.6   | -        | 0.0   | -        | 0.0  |
| ENSDARG00000054255 | <i>tctex1d2</i>         | Tctex1 domain containing 2                                                                        | Ensembl_zebrafish    | -        | 1.3   | -        | 1.3   | 2.28E-03 | up    | -        | 1.9  |
| ENSONIG00000012488 | <i>tctex1d2</i>         | Tctex1 domain containing 2                                                                        | Ensembl_nile_tilapia | -        | 0.00  | -        | 0.0   | 6.99E-02 | down  | -        | 0.0  |
| 56326278           | CR650765.2              | Tetraodon nigroviridis full-length cDNA                                                           | nt                   | -        | 1.2   | 9.01E-02 | up    | -        | 1.4   | -        | 2.0  |
| ENSGACG00000005236 | <i>tspan2 (2 of 2)</i>  | tetraspanin 2                                                                                     | Ensembl_stickleback  | -        | up    | 5.20E-03 | up    | -        | down  | -        | -1.7 |
| ENSDARG00000008407 | <i>tspan7b</i>          | tetraspanin 7b                                                                                    | Ensembl_zebrafish    | -        | -3.0  | -        | -2.5  | 5.07E-02 | -14.4 | -        | up   |
| ENSONIG00000003747 | <i>ttc14</i>            | tetratricopeptide repeat domain 14                                                                | Ensembl_nile_tilapia | 6.54E-03 | up    | -        | down  | 6.84E-03 | up    | -        | 1.0  |
| 290793107          | GU217573.1              | Thunnus thynnus vitellogenin C mRNA, complete cds                                                 | nt                   | -        | 0.00  | -        | 0.0   | -        | up    | 1.57E-20 | up   |
| ENSGACG00000016986 | <i>trip4</i>            | thyroid hormone receptor interactor 4                                                             | Ensembl_stickleback  | 1.61E-02 | up    | -        | up    | -        | -1.0  | -        | up   |
| ENSDARG00000002909 | <i>tip3</i>             | tight junction protein 3                                                                          | Ensembl_zebrafish    | -        | 1.2   | -        | 1.1   | 1.59E-02 | 11.6  | 2.14E-02 | 12.3 |
| ENSGACG00000003028 | <i>timp2 (2 of 2)</i>   | TIMP metalloproteinase inhibitor 2                                                                | Ensembl_stickleback  | -        | 0.00  | -        | down  | 2.75E-04 | down  | -        | 0.0  |
| ENSORLG00000012522 | <i>tsta3</i>            | tissue specific transplantation antigen P35B                                                      | Ensembl_medaka       | 2.00E-02 | down  | 3.88E-05 | down  | -        | 0.0   | -        | 0.0  |
| ENSDARG00000063420 | <i>tox4 (2 of 2)</i>    | TOX high mobility group box family member 4                                                       | Ensembl_zebrafish    | -        | -15.1 | 6.40E-02 | 23.9  | -        | 4.7   | -        | down |
| ENSGACG00000017200 | <i>taldo1</i>           | transaldolase 1                                                                                   | Ensembl_stickleback  | -        | down  | 2.29E-02 | down  | -        | -1.6  | -        | 0.0  |
| ENSONIG00000009845 | <i>tf</i>               | transferrin                                                                                       | Ensembl_nile_tilapia | -        | down  | 9.01E-02 | up    | 8.78E-08 | down  | -        | -1.1 |
| ENSGACG00000019195 | <i>tmc7</i>             | transmembrane channel-like 7                                                                      | Ensembl_stickleback  | 5.86E-02 | up    | -        | -1.3  | -        | down  | -        | up   |
| ENSGACG00000015584 | <i>tmed2</i>            | transmembrane emp24 domain trafficking protein 2                                                  | Ensembl_stickleback  | -        | 0.00  | -        | 0.0   | 8.79E-02 | down  | -        | 0.0  |
| ENSGACG00000016363 | <i>tmed9</i>            | transmembrane emp24 protein transport domain containing 9                                         | Ensembl_stickleback  | -        | 1.8   | -        | -2.7  | 6.04E-03 | -22.0 | -        | up   |
| ENSGACG00000004023 | <i>tmem106c</i>         | transmembrane protein 106C                                                                        | Ensembl_stickleback  | -        | 0.00  | 1.71E-02 | -15.7 | -        | 0.0   | -        | down |
| ENSGACG00000009084 | <i>tmem136 (2 of 2)</i> | transmembrane protein 136                                                                         | Ensembl_stickleback  | 2.50E-02 | down  | -        | up    | 8.79E-02 | up    | -        | 0.0  |

|                     |                       |                                                                                         |                      |          |       |          |       |          |       |          |         |
|---------------------|-----------------------|-----------------------------------------------------------------------------------------|----------------------|----------|-------|----------|-------|----------|-------|----------|---------|
| ENSGACG00000013071  | <i>tmem161a</i>       | transmembrane protein 161A                                                              | Ensembl_stickleback  | -        | up    | 5.69E-02 | -5.4  | -        | 0.0   | 3.31E-05 | up      |
| ENSGACG00000016548  | <i>tmem38b</i>        | transmembrane protein 38B                                                               | Ensembl_stickleback  | 4.11E-07 | 43.7  | -        | 1.1   | -        | -1.3  | -        | 5.6     |
| ENSGACG00000003118  | <i>tmem42</i>         | transmembrane protein 42                                                                | Ensembl_stickleback  | -        | -4.4  | -        | 0.0   | 2.01E-17 | up    | -        | down    |
| ENSGACG00000004640  | <i>tmem64</i>         | transmembrane protein 64                                                                | Ensembl_stickleback  | -        | -1.8  | -        | -4.3  | -        | -5.3  | 2.31E-02 | down    |
| ENSGACG00000015841  | <i>tnpo1</i>          | transportin 1                                                                           | Ensembl_stickleback  | -        | down  | -        | down  | 3.24E-03 | down  | -        | -1.1    |
| ENSGACG00000007382  | <i>trim36</i>         | tripartite motif containing 36                                                          | Ensembl_stickleback  | -        | -7.5  | -        | -4.0  | 8.81E-02 | -10.2 | -        | -7.6    |
| ENSDARG00000028027  | <i>trim63</i>         | tripartite motif containing 63                                                          | Ensembl_zebrafish    | -        | -1.7  | -        | 1.0   | 2.69E-02 | -16.5 | -        | down    |
| ENSGACG00000004198  | <i>tnnc2 (1 of 2)</i> | troponin C type 2 (fast)                                                                | Ensembl_stickleback  | -        | -6.2  | 1.17E-03 | -12.4 | 3.31E-04 | -12.8 | 1.38E-03 | -11.1   |
| ENSDARG000000042993 | <i>try</i>            | trypsin                                                                                 | Ensembl_zebrafish    | -        | 1.2   | 1.73E-07 | -32.3 | -        | -1.1  | -        | down    |
| 229366578           | <i>acq58269.1</i>     | Trypsin precursor                                                                       | nr                   | 3.04E-05 | 19.4  | -        | 0.0   | -        | 0.0   | -        | 0.0     |
| ENSONIG00000003233  | <i>tdrd3</i>          | tudor domain containing 3                                                               | Ensembl_nile_tilapia | -        | -1.5  | -        | 1.6   | 5.65E-02 | up    | -        | -3.3    |
| ENSGACG00000009537  | <i>tpcn1</i>          | two pore segment channel 1                                                              | Ensembl_stickleback  | -        | 1.4   | -        | -4.7  | -        | 2.2   | 9.97E-03 | -9.0    |
| ENSDARG00000036832  | <i>cyt1l</i>          | type I cytokeratin, enveloping layer, like                                              | Ensembl_zebrafish    | -        | 1.1   | 3.95E-03 | 9.4   | -        | 2.6   | -        | 1.0     |
| ENSGACG00000005854  | <i>uchl5</i>          | ubiquitin carboxyl-terminal hydrolase L5                                                | Ensembl_stickleback  | -        | down  | -        | 0.0   | 4.49E-02 | up    | -        | up      |
| ENSDARG000000087495 | <i>usp2 (2 of 3)</i>  | ubiquitin specific peptidase 2                                                          | Ensembl_zebrafish    | -        | 2.4   | -        | 2.2   | 3.36E-02 | 6.6   | -        | 1.7     |
| ENSGACG00000011028  | <i>usp36</i>          | ubiquitin specific peptidase 36                                                         | Ensembl_stickleback  | 1.08E-02 | -34.3 | 2.07E-03 | down  | 1.42E-03 | down  | 2.53E-05 | -90.0   |
| ENSDARG00000007714  | <i>ube2q1</i>         | ubiquitin-conjugating enzyme E2Q (putative) 1                                           | Ensembl_zebrafish    | -        | -3.7  | 3.54E-02 | up    | -        | 1.4   | -        | 0.0     |
| ENSDARG00000011537  | <i>ugt2a5</i>         | UDP glucuronosyltransferase 2 family, polypeptide A5                                    | Ensembl_zebrafish    | -        | down  | -        | down  | 1.91E-07 | down  | -        | -1.6    |
| ENSDARG000000039501 | <i>ugt2a6</i>         | UDP glucuronosyltransferase 2 family, polypeptide A6                                    | Ensembl_zebrafish    | -        | 0.00  | -        | down  | 4.36E-09 | down  | -        | 0.0     |
| ENSORLG00000007327  | <i>galnt14</i>        | UDP-N-acetyl-alpha-D-galactosamine:polypeptide N-acetylgalactosaminyltransferase-like 4 | Ensembl_medaka       | -        | down  | -        | 0.0   | 1.96E-02 | down  | -        | 0.0     |
| ENSGACG00000009985  | <i>unc45b</i>         | unc-45 homolog B (C. elegans)                                                           | Ensembl_stickleback  | -        | 1.8   | -        | up    | 6.59E-02 | -5.5  | -        | -6.7    |
| ENSDARG000000078382 | CABZ01075938.1        | Uncharacterize d protein                                                                | Ensembl_zebrafish    | -        | -1.6  | 6.21E-08 | up    | 9.52E-06 | up    | 5.91E-02 | up      |
| ENSDARG000000087843 | CABZ01092722.1        | Uncharacterized protein                                                                 | Ensembl_zebrafish    | -        | -1.1  | -        | 3.0   | -        | 1.3   | 2.50E-02 | -6.9    |
| ENSDARG000000088309 | <i>ct573337.1</i>     | Uncharacterized protein                                                                 | Ensembl_zebrafish    | 3.75E-02 | 8.5   | -        | up    | -        | up    | -        | 0.0     |
| 116517246           | NP_001070844.1        | uncharacterized protein LOC559260 precursor                                             | Refseq_proteins      | -        | 1.2   | -        | 1.0   | 2.26E-02 | 24.6  | -        | 2.8     |
| 158534007           | NP_001103579.1        | uncharacterized protein LOC561171 precursor                                             | Refseq_proteins      | -        | 0.00  | -        | down  | -        | 0.0   | 8.84E-12 | 20469.0 |
| ENSGACG00000017435  | <i>upf3b</i>          | UPF3 regulator of nonsense transcripts homolog B (yeast)                                | Ensembl_stickleback  | 2.50E-02 | down  | -        | 0.0   | 1.50E-04 | down  | -        | 0.0     |
| ENSGACG00000014740  | <i>utp18</i>          | UTP18 small subunit (SSU) processome component homolog (yeast)                          | Ensembl_stickleback  | -        | up    | -        | 0.0   | 1.28E-02 | up    | -        | 0.0     |

|                    |                        |                                                                                      |                     |          |       |          |       |          |       |          |         |
|--------------------|------------------------|--------------------------------------------------------------------------------------|---------------------|----------|-------|----------|-------|----------|-------|----------|---------|
| ENSGACG0000005430  | <i>crk (1 of 2)</i>    | v-crk sarcoma virus CT10 oncogene homolog (avian)                                    | Ensembl_stickleback | 4.69E-02 | down  | -        | -1.6  | -        | 1.4   | -        | down    |
| ENSGACG0000005867  | <i>vsx2</i>            | visual system homeobox 2                                                             | Ensembl_stickleback | 7.32E-02 | down  | -        | 1.0   | -        | 1.8   | -        | -1.2    |
| ENSORLG00000016336 | <i>vmo1</i>            | vitelline membrane outer layer 1 homolog (chicken)                                   | Ensembl_medaka      | -        | 0.00  | 9.89E-05 | -17.4 | -        | up    | -        | -2.2    |
| ENSDARG00000055809 | <i>vtg2</i>            | vitellogenin 2                                                                       | Ensembl_zebrafish   | -        | -1.2  | -        | 2.7   | -        | -1.5  | 9.15E-33 | 20268.3 |
| ENSDARG00000092419 | <i>vtg7</i>            | vitellogenin 7                                                                       | Ensembl_zebrafish   | -        | -1.5  | -        | -1.6  | -        | -1.4  | 2.57E-15 | 317.5   |
| ENSGACG0000007380  | <i>wdr61</i>           | WD repeat domain 61                                                                  | Ensembl_stickleback | 1.36E-02 | down  | 3.54E-02 | down  | -        | 0.0   | -        | down    |
| ENSORLG00000005229 | <i>wls</i>             | wntless homolog (Drosophila)                                                         | Ensembl_medaka      | -        | 2.8   | -        | -1.2  | 9.04E-04 | down  | -        | down    |
| ENSGACG00000019114 | <i>xrcc6bp1</i>        | XRCC6 binding protein 1                                                              | Ensembl_stickleback | 7.95E-05 | 23.6  | -        | up    | -        | -1.0  | -        | down    |
| ENSGACG00000020724 | <i>yipf5</i>           | Yip1 domain family, member 5                                                         | Ensembl_stickleback | -        | down  | -        | down  | 3.65E-02 | down  | -        | up      |
| 238943009          | CU695216.16            | Zebrafish DNA sequence from clone CH73-348N11 in linkage group 3, complete sequence  | nt                  | -        | 1.3   | 1.76E-04 | up    | -        | 5.1   | -        | 1.2     |
| 156764000          | CU464084.9             | Zebrafish DNA sequence from clone CH73-360N3 in linkage group 3, complete sequence   | nt                  | -        | 1.6   | 2.85E-02 | -63.5 | -        | -2.6  | -        | -1.4    |
| ENSDARG00000093844 | zgc:136461             | zgc:136461                                                                           | Ensembl_zebrafish   | -        | down  | 2.78E-07 | -34.5 | -        | 0.0   | -        | down    |
| ENSDARG00000079274 | zgc:66382              | zgc:66382                                                                            | Ensembl_zebrafish   | -        | down  | 4.52E-06 | -20.9 | -        | 1.4   | -        | down    |
| ENSGACG00000015779 | <i>zfhx3</i>           | zinc finger homeobox 3                                                               | Ensembl_stickleback | -        | 1.0   | 4.30E-03 | down  | 4.65E-02 | -7.9  | 3.74E-02 | down    |
| ENSGACG00000002418 | <i>zfhx4</i>           | zinc finger homeobox 4                                                               | Ensembl_stickleback | -        | -3.9  | -        | -6.0  | -        | -1.7  | 6.34E-11 | -403.4  |
| ENSGACG00000002626 | <i>znf423</i>          | zinc finger protein 423                                                              | Ensembl_stickleback | -        | -16.1 | 1.49E-02 | down  | 1.98E-03 | -53.9 | -        | down    |
| ENSGACG00000016481 | <i>znf710 (1 of 2)</i> | zinc finger protein 710                                                              | Ensembl_stickleback | -        | up    | -        | up    | 3.02E-02 | up    | -        | 3.2     |
| ENSGACG00000010661 | <i>znf750</i>          | zinc finger protein 750                                                              | Ensembl_stickleback | -        | -1.1  | 9.89E-05 | down  | -        | up    | -        | down    |
| ENSGACG00000005282 | <i>zcchc11</i>         | zinc finger, CCHC domain containing 11                                               | Ensembl_stickleback | -        | 1.3   | -        | -1.4  | -        | 2.2   | 5.72E-03 | -9.7    |
| ENSGACG00000009457 | <i>zranb2</i>          | zinc finger, RAN-binding domain containing 2                                         | Ensembl_stickleback | -        | 1.0   | -        | down  | -        | -2.1  | 5.91E-02 | up      |
| ENSGACG00000005043 | <i>zwilch</i>          | Zwilch, kinetochore associated, homolog (Drosophila)                                 | Ensembl_stickleback | -        | down  | -        | down  | 1.28E-02 | down  | -        | down    |
| CX256055           | gb CX256055.1          | 1308952 NCCWA 02RT Oncorhynchus mykiss cDNA clone 02RT117K06 3', mRNA sequence.      | EST_others          | -        | 0.00  | 1.29E-03 | -23.7 | -        | 0.0   | -        | 1.4     |
| CX261231           | gb CX261231.1          | 1314740 NCCWA 02RT Oncorhynchus mykiss cDNA clone 02RT125C20 3', mRNA sequence.      | EST_others          | -        | 0.00  | -        | 0.0   | -        | 0.0   | 7.12E-03 | 11.2    |
| CX262650           | gb CX262650.1          | 1316309 NCCWA 02RT Oncorhynchus mykiss cDNA clone 02RT128O12 5', mRNA sequence.      | EST_others          | 1.36E-02 | up    | -        | 1.0   | 1.59E-02 | up    | -        | 0.0     |
| CX035424           | gb CX035424.1          | 1348057 NCCWA 10RT#3 Oncorhynchus mykiss cDNA clone 10RT#3_133F07 5', mRNA sequence. | EST_others          | -        | up    | -        | 1.0   | 3.02E-02 | down  | -        | 0.0     |
| CX036514           | gb CX036514.1          | 1349293 NCCWA 10RT#3 Oncorhynchus mykiss cDNA clone 10RT#3_137A19 5', mRNA sequence. | EST_others          | -        | 1.4   | 2.85E-02 | up    | -        | 1.4   | -        | up      |
| CX039308           | gb CX039308.1          | 1352460 NCCWA 10RT#3 Oncorhynchus mykiss                                             | EST_others          | -        | 1.3   | 4.12E-02 | -11.4 | -        | -2.0  | -        | 1.4     |

|                    |                    |                                                                                                                                          |                     |          |       |          |       |          |       |          |       |  |
|--------------------|--------------------|------------------------------------------------------------------------------------------------------------------------------------------|---------------------|----------|-------|----------|-------|----------|-------|----------|-------|--|
|                    |                    | cDNA clone 10RT#3_145E18 5', mRNA sequence.                                                                                              |                     |          |       |          |       |          |       |          |       |  |
| ENSGACG00000012314 | <i>nt5dc2</i>      | 5'-nucleotidase domain containing 2                                                                                                      | Ensembl_stickleback | -        | down  | 7.27E-02 | down  | 9.04E-04 | down  | -        | down  |  |
| CA350320           | gb CA350320.1      | 621050 NCCCWA 1RT Oncorhynchus mykiss cDNA clone 1RT147P01_B_H01 5', mRNA sequence.                                                      | EST_others          | -        | 0.00  | -        | 1.3   | 4.49E-02 | down  | -        | up    |  |
| CA367945           | gb CA367945.1      | 643965 NCCCWA 1RT Oncorhynchus mykiss cDNA clone 1RT148K13_A_F07 5', mRNA sequence.                                                      | EST_others          | -        | 1.4   | -        | 0.0   | 1.59E-02 | up    | -        | 0.0   |  |
| CA376054           | gb CA376054.1      | 654297 NCCCWA 1RT Oncorhynchus mykiss cDNA clone 1RT34F22_D_C11 5', mRNA sequence.                                                       | EST_others          | -        | -3.6  | 9.01E-02 | down  | -        | 3.0   | -        | down  |  |
| CA383249           | gb CA383249.1      | 663393 NCCCWA 1RT Oncorhynchus mykiss cDNA clone 1RT13C10_C_B05 5', mRNA sequence.                                                       | EST_others          | -        | -1.1  | -        | 1.5   | -        | up    | 6.86E-02 | 23.1  |  |
| BX079066           | emb BX079066.3     | BX079066 AGENAE Rainbow trout normalized multi-tissues library (tcad) Oncorhynchus mykiss cDNA clone tcad0007.e.09 3prim, mRNA sequence. | EST_others          | -        | 0.00  | -        | 2.3   | 3.65E-02 | -31.7 | -        | 0.0   |  |
| BX081886           | emb BX081886.2     | BX081886 AGENAE Rainbow trout normalized multi-tissues library (tcac) Oncorhynchus mykiss cDNA clone tcac0002.f.09 5prim, mRNA sequence. | EST_others          | -        | -1.4  | 2.87E-03 | down  | -        | -1.3  | -        | 1.9   |  |
| BX085529           | emb BX085529.3     | BX085529 tcav Oncorhynchus mykiss cDNA clone tcav0001.i.12 5prim, mRNA sequence.                                                         | EST_others          | -        | -1.5  | -        | -1.9  | 4.39E-02 | -6.4  | -        | 1.0   |  |
| BX860267           | emb BX860267.3     | BX860267 tcba Oncorhynchus mykiss cDNA clone tcba0008.c.09 5prim, mRNA sequence.                                                         | EST_others          | -        | 0.00  | 6.34E-04 | -22.7 | -        | -1.4  | -        | 0.0   |  |
| BX862653           | emb BX862653.3     | BX862653 tcba Oncorhynchus mykiss cDNA clone tcba0011.k.06 5prim, mRNA sequence.                                                         | EST_others          | -        | 0.00  | -        | 0.0   | 7.19E-06 | down  | 4.78E-02 | down  |  |
| BX862659           | emb BX862659.3     | BX862659 tcba Oncorhynchus mykiss cDNA clone tcba0011.k.13 5prim, mRNA sequence.                                                         | EST_others          | -        | 2.4   | -        | 1.7   | -        | 1.7   | 4.71E-06 | up    |  |
| BX863438           | emb BX863438.3     | BX863438 tcba Oncorhynchus mykiss cDNA clone tcba0014.c.06 5prim, mRNA sequence.                                                         | EST_others          | -        | -1.5  | -        | 0.0   | 1.22E-03 | down  | -        | down  |  |
| BX866879           | emb BX866879.3     | BX866879 tcba Oncorhynchus mykiss cDNA clone tcba0026.f.12 5prim, mRNA sequence.                                                         | EST_others          | -        | -1.7  | -        | up    | -        | up    | 1.19E-02 | up    |  |
| BX871489           | emb BX871489.2     | BX871489 tcbk Oncorhynchus mykiss cDNA clone tcbk0008.d.18 5prim, mRNA sequence.                                                         | EST_others          | -        | -1.1  | 5.82E-03 | -10.2 | -        | up    | -        | down  |  |
| ENSGACG00000000665 | ENSGACG00000000665 | ENSGACT00000000858                                                                                                                       | Ensembl_stickleback | -        | down  | -        | down  | 3.11E-02 | -32.4 | 3.24E-02 | -29.2 |  |
| ENSGACG00000001046 | ENSGACG00000001046 | ENSGACT00000001352                                                                                                                       | Ensembl_stickleback | -        | 0.00  | 5.20E-03 | up    | -        | up    | -        | 0.0   |  |
| ENSGACG00000001103 | ENSGACG00000001103 | ENSGACT00000001428                                                                                                                       | Ensembl_stickleback | 8.33E-04 | -53.1 | -        | 1.1   | -        | -1.3  | -        | 2.3   |  |
| ENSGACG00000002397 | ENSGACG00000002397 | ENSGACT00000003154                                                                                                                       | Ensembl_stickleback | -        | -1.2  | -        | down  | -        | -17.9 | 5.56E-10 | up    |  |
| ENSGACG00000003684 | ENSGACG00000003684 | ENSGACT00000004857                                                                                                                       | Ensembl_stickleback | 2.50E-02 | down  | -        | 1.1   | -        | 1.4   | 9.95E-02 | up    |  |

|                   |                    |                    |                     |          |      |          |       |          |       |          |       |
|-------------------|--------------------|--------------------|---------------------|----------|------|----------|-------|----------|-------|----------|-------|
| ENSGACG0000003787 | ENSGACG00000003787 | ENSGACT00000004984 | Ensembl_stickleback | -        | 1.0  | 4.56E-06 | up    | -        | 0.0   | -        | up    |
| ENSGACG0000004988 | ENSGACG00000004988 | ENSGACT00000006645 | Ensembl_stickleback | -        | down | -        | 0.0   | 1.95E-02 | -34.6 | 1.00E-02 | down  |
| ENSGACG0000005457 | ENSGACG00000005457 | ENSGACT00000007232 | Ensembl_stickleback | -        | up   | 1.20E-06 | 128.1 | -        | up    | -        | down  |
| ENSGACG0000005610 | ENSGACG00000005610 | ENSGACT00000007471 | Ensembl_stickleback | -        | -1.4 | 7.31E-06 | -20.2 | -        | -1.1  | -        | 1.2   |
| ENSGACG0000006023 | ENSGACG00000006023 | ENSGACT00000007994 | Ensembl_stickleback | -        | 1.3  | -        | 3.7   | 2.43E-02 | up    | -        | 0.0   |
| ENSGACG0000006109 | ENSGACG00000006109 | ENSGACT00000008146 | Ensembl_stickleback | -        | -2.6 | 7.81E-02 | -6.9  | 3.76E-02 | -6.3  | 9.93E-06 | -36.5 |
| ENSGACG0000006376 | ENSGACG00000006376 | ENSGACT00000008463 | Ensembl_stickleback | -        | -3.3 | 2.28E-02 | -9.6  | -        | -1.4  | -        | -2.1  |
| ENSGACG0000006658 | ENSGACG00000006658 | ENSGACT00000008841 | Ensembl_stickleback | 7.32E-02 | up   | 2.85E-02 | up    | -        | -1.1  | -        | 0.0   |
| ENSGACG0000007518 | ENSGACG00000007518 | ENSGACT00000010009 | Ensembl_stickleback | -        | 2.6  | -        | up    | 8.30E-03 | down  | 5.91E-02 | down  |
| ENSGACG0000007857 | ENSGACG00000007857 | ENSGACT00000010455 | Ensembl_stickleback | -        | 0.00 | -        | 0.0   | 1.07E-03 | down  | -        | 0.0   |
| ENSGACG0000007990 | ENSGACG00000007990 | ENSGACT00000010603 | Ensembl_stickleback | 2.78E-03 | down | -        | 1.3   | 3.90E-03 | down  | -        | down  |
| ENSGACG0000008104 | ENSGACG00000008104 | ENSGACT00000010748 | Ensembl_stickleback | -        | -1.4 | 1.36E-03 | -11.0 | -        | 1.7   | -        | -1.8  |
| ENSGACG0000008362 | ENSGACG00000008362 | ENSGACT00000011076 | Ensembl_stickleback | -        | 0.00 | -        | down  | -        | up    | 3.31E-05 | down  |
| ENSGACG0000008527 | ENSGACG00000008527 | ENSGACT00000011292 | Ensembl_stickleback | -        | up   | -        | 0.0   | -        | 0.0   | 4.66E-03 | down  |
| ENSGACG0000008544 | ENSGACG00000008544 | ENSGACT00000011317 | Ensembl_stickleback | 1.61E-02 | down | -        | 1.6   | -        | -1.6  | -        | -1.2  |
| ENSGACG0000008811 | ENSGACG00000008811 | ENSGACT00000011669 | Ensembl_stickleback | -        | 0.00 | -        | 0.0   | 8.30E-03 | down  | -        | 0.0   |
| ENSGACG0000009769 | ENSGACG00000009769 | ENSGACT00000012954 | Ensembl_stickleback | -        | down | -        | up    | -        | down  | 3.46E-09 | 990.0 |
| ENSGACG0000010278 | ENSGACG00000010278 | ENSGACT00000013605 | Ensembl_stickleback | -        | -1.1 | -        | down  | 4.99E-02 | -8.7  | -        | -3.1  |
| ENSGACG0000010455 | ENSGACG00000010455 | ENSGACT00000013842 | Ensembl_stickleback | 1.27E-03 | 28.4 | -        | 0.0   | -        | up    | -        | 0.0   |
| ENSGACG0000011411 | ENSGACG00000011411 | ENSGACT00000015161 | Ensembl_stickleback | -        | -6.8 | -        | -1.7  | 7.05E-02 | -13.1 | -        | -5.4  |
| ENSGACG0000011761 | ENSGACG00000011761 | ENSGACT00000015587 | Ensembl_stickleback | -        | 2.8  | 1.19E-02 | up    | -        | -8.0  | -        | up    |
| ENSGACG0000012223 | ENSGACG00000012223 | ENSGACT00000016209 | Ensembl_stickleback | -        | up   | 9.01E-02 | up    | -        | -1.9  | -        | -1.4  |
| ENSGACG0000012735 | ENSGACG00000012735 | ENSGACT00000016852 | Ensembl_stickleback | -        | down | 6.21E-08 | down  | -        | down  | -        | up    |

|                    |                    |                    |                      |          |       |          |        |          |        |          |        |
|--------------------|--------------------|--------------------|----------------------|----------|-------|----------|--------|----------|--------|----------|--------|
| ENSGACG00000012810 | ENSGACG00000012810 | ENSGACT00000016961 | Ensembl_stickleback  | -        | 1.1   | -        | 0.0    | 2.75E-04 | down   | -        | 0.0    |
| ENSGACG00000012940 | ENSGACG00000012940 | ENSGACT00000017168 | Ensembl_stickleback  | 9.44E-05 | up    | 2.33E-05 | 51.6   | -        | -1.3   | -        | -12.1  |
| ENSGACG00000013362 | ENSGACG00000013362 | ENSGACT00000017700 | Ensembl_stickleback  | -        | down  | -        | down   | 1.04E-02 | down   | -        | down   |
| ENSGACG00000013443 | ENSGACG00000013443 | ENSGACT00000017812 | Ensembl_stickleback  | -        | down  | -        | 0.0    | 8.79E-02 | down   | -        | 2.1    |
| ENSGACG00000013510 | ENSGACG00000013510 | ENSGACT00000017897 | Ensembl_stickleback  | -        | -2.5  | -        | 0.0    | -        | -5.5   | 9.86E-13 | up     |
| ENSGACG00000013819 | ENSGACG00000013819 | ENSGACT00000018284 | Ensembl_stickleback  | -        | 2.5   | -        | 1.0    | 3.90E-03 | up     | -        | 2.6    |
| ENSGACG00000014561 | ENSGACG00000014561 | ENSGACT00000019250 | Ensembl_stickleback  | -        | 0.00  | 4.56E-06 | -21.0  | -        | up     | -        | -2.2   |
| ENSGACG00000014922 | ENSGACG00000014922 | ENSGACT00000019782 | Ensembl_stickleback  | -        | down  | -        | down   | 6.81E-04 | down   | 4.78E-02 | down   |
| ENSGACG00000015113 | ENSGACG00000015113 | ENSGACT00000019973 | Ensembl_stickleback  | 1.53E-03 | down  | 1.20E-06 | down   | 4.79E-06 | down   | -        | -5.7   |
| ENSGACG00000016237 | ENSGACG00000016237 | ENSGACT00000021465 | Ensembl_stickleback  | -        | 1.1   | -        | 1.2    | 9.52E-06 | up     | -        | 0.0    |
| ENSGACG00000016744 | ENSGACG00000016744 | ENSGACT00000022145 | Ensembl_stickleback  | -        | 0.00  | -        | 7.5    | -        | up     | 5.91E-02 | down   |
| ENSGACG00000017541 | ENSGACG00000017541 | ENSGACT00000023221 | Ensembl_stickleback  | -        | -1.6  | 3.51E-09 | -180.7 | -        | 1.2    | -        | up     |
| ENSGACG00000017983 | ENSGACG00000017983 | ENSGACT00000023805 | Ensembl_stickleback  | -        | down  | -        | 0.0    | 8.60E-08 | -110.3 | -        | 0.0    |
| ENSGACG00000018030 | ENSGACG00000018030 | ENSGACT00000023870 | Ensembl_stickleback  | -        | -5.1  | -        | -2.6   | 1.25E-04 | -41.5  | -        | -2.2   |
| ENSGACG00000018802 | ENSGACG00000018802 | ENSGACT00000024909 | Ensembl_stickleback  | -        | 0.00  | 9.86E-07 | down   | 1.28E-06 | down   | -        | down   |
| ENSGACG00000019767 | ENSGACG00000019767 | ENSGACT00000026179 | Ensembl_stickleback  | -        | 0.00  | -        | up     | 6.85E-02 | -12.0  | -        | down   |
| ENSGACG00000020439 | ENSGACG00000020439 | ENSGACT00000027081 | Ensembl_stickleback  | 1.08E-02 | -34.4 | 1.08E-03 | up     | -        | -5.5   | -        | down   |
| ENSGACG00000020467 | ENSGACG00000020467 | ENSGACT00000027116 | Ensembl_stickleback  | -        | 0.00  | -        | down   | 3.59E-04 | down   | 7.28E-04 | down   |
| ENSGACG00000020921 | ENSGACG00000020921 | ENSGACT00000027713 | Ensembl_stickleback  | 2.14E-06 | down  | 7.73E-07 | -65.9  | 3.05E-10 | -226.8 | 7.38E-10 | -303.9 |
| ENSONIG00000002827 | ENSONIG00000002827 | ENSONIT00000003544 | Ensembl_nile_tilapia | -        | up    | 6.22E-03 | up     | -        | down   | -        | -1.0   |
| ENSONIG00000004540 | ENSONIG00000004540 | ENSONIT00000005718 | Ensembl_nile_tilapia | -        | -1.2  | -        | 2.9    | -        | -1.7   | 2.31E-02 | down   |
| ENSONIG00000007219 | ENSONIG00000007219 | ENSONIT00000009107 | Ensembl_nile_tilapia | -        | -1.4  | 2.12E-06 | 55.2   | -        | 2.8    | -        | -1.1   |
| ENSONIG00000009825 | ENSONIG00000009825 | ENSONIT00000012355 | Ensembl_nile_tilapia | -        | 0.00  | -        | -2.1   | -        | 5.1    | 3.37E-15 | 225.1  |

|                    |                    |                                                                                                                                               |                      |          |      |          |       |          |       |          |       |
|--------------------|--------------------|-----------------------------------------------------------------------------------------------------------------------------------------------|----------------------|----------|------|----------|-------|----------|-------|----------|-------|
| ENSONIG00000011792 | ENSONIG00000011792 | ENSONIT00000014857                                                                                                                            | Ensembl_nile_tilapia | -        | 0.00 | 2.37E-03 | -18.5 | -        | 0.0   | -        | 0.0   |
| ENSONIG00000013985 | ENSONIG00000013985 | ENSONIT00000017595                                                                                                                            | Ensembl_nile_tilapia | -        | 1.1  | -        | -1.6  | 5.07E-02 | 20.1  | -        | 2.3   |
| ENSONIG00000017323 | ENSONIG00000017323 | ENSONIT00000021866                                                                                                                            | Ensembl_nile_tilapia | -        | -1.5 | -        | -4.0  | 1.30E-02 | -12.0 | -        | -1.4  |
| ENSONIG00000019573 | ENSONIG00000019573 | ENSONIT00000024660                                                                                                                            | Ensembl_nile_tilapia | -        | -1.3 | -        | -1.4  | -        | -2.0  | 7.68E-02 | down  |
| ENSORLG00000000460 | ENSORLG00000000460 | ENSORLT00000000568                                                                                                                            | Ensembl_medaka       | -        | 0.00 | -        | 2.1   | 7.87E-07 | 143.3 | -        | -5.8  |
| ENSORLG00000001173 | ENSORLG00000001173 | ENSORLT00000001443                                                                                                                            | Ensembl_medaka       | -        | 1.1  | -        | 3.7   | -        | 1.2   | 7.68E-02 | down  |
| ENSORLG00000001190 | ENSORLG00000001190 | ENSORLT00000001466                                                                                                                            | Ensembl_medaka       | -        | 1.3  | 6.31E-02 | 6.1   | -        | down  | -        | -2.2  |
| ENSORLG00000003700 | ENSORLG00000003700 | ENSORLT00000004613                                                                                                                            | Ensembl_medaka       | -        | -2.5 | -        | down  | -        | 0.0   | 3.47E-03 | -44.5 |
| ENSORLG00000010522 | ENSORLG00000010522 | ENSORLT00000013192                                                                                                                            | Ensembl_medaka       | -        | 0.00 | -        | 0.0   | -        | 0.0   | 6.43E-04 | up    |
| ENSORLG00000011293 | ENSORLG00000011293 | ENSORLT00000014151                                                                                                                            | Ensembl_medaka       | -        | 0.00 | 4.90E-02 | 9.7   | -        | 0.0   | -        | 0.0   |
| ENSORLG00000011321 | ENSORLG00000011321 | ENSORLT00000014185                                                                                                                            | Ensembl_medaka       | -        | 0.00 | 6.16E-05 | down  | -        | 2.1   | -        | -1.9  |
| ENSORLG00000012785 | ENSORLG00000012785 | ENSORLT00000016011                                                                                                                            | Ensembl_medaka       | -        | -4.9 | -        | -3.7  | 1.17E-02 | -39.9 | -        | down  |
| ENSORLG00000013333 | ENSORLG00000013333 | ENSORLT00000016712                                                                                                                            | Ensembl_medaka       | -        | 0.00 | -        | 0.0   | -        | 0.0   | 1.13E-12 | up    |
| ENSORLG00000019280 | ENSORLG00000019280 | ENSORLT00000024015                                                                                                                            | Ensembl_medaka       | 1.36E-03 | 21.0 | -        | up    | -        | up    | -        | 0.0   |
| ENSORLG00000020091 | ENSORLG00000020091 | ENSORLT00000024932                                                                                                                            | Ensembl_medaka       | 1.61E-02 | down | -        | down  | -        | -1.5  | -        | down  |
| EV367322           | gb EV367322.1      | EST_cclu_evb_703099 ccluevb mixed_tissue Coregonus clupeaformis cDNA Coregonus clupeaformis cDNA clone cclu_evb_12_91_rev 3', mRNA sequence.  | EST_others           | -        | down | -        | down  | 1.28E-02 | down  | -        | down  |
| EV368845           | gb EV368845.1      | EST_cclu_evb_704787 ccluevb mixed_tissue Coregonus clupeaformis cDNA Coregonus clupeaformis cDNA clone cclu_evb_14_243_rev 3', mRNA sequence. | EST_others           | -        | -1.7 | -        | up    | 1.09E-02 | -10.4 | -        | 0.0   |
| EV370019           | gb EV370019.1      | EST_cclu_evb_706182 ccluevb mixed_tissue Coregonus clupeaformis cDNA Coregonus clupeaformis cDNA clone cclu_evb_16_102_rev 3', mRNA sequence. | EST_others           | -        | 1.5  | -        | -2.4  | 8.79E-02 | -8.6  | -        | up    |
| EV370268           | gb EV370268.1      | EST_cclu_evb_706314 ccluevb mixed_tissue Coregonus clupeaformis cDNA Coregonus clupeaformis cDNA clone cclu_evb_16_234_rev 3', mRNA sequence. | EST_others           | -        | 7.7  | 6.31E-02 | 14.6  | -        | 4.6   | -        | 6.5   |
| FK872811           | gb FK872811.1      | EST_crog_evp_897819 crog_evp Caligus                                                                                                          | EST_others           | -        | 2.2  | -        | 4.1   | 2.99E-03 | 9.4   | -        | 2.8   |

|          |               |                                                                                                                                                                          |            |          |       |          |      |          |       |          |      |  |  |
|----------|---------------|--------------------------------------------------------------------------------------------------------------------------------------------------------------------------|------------|----------|-------|----------|------|----------|-------|----------|------|--|--|
|          |               | rogercresseyi cDNA clone<br>crog_evp_506_315_fwd 5', mRNA sequence.                                                                                                      |            |          |       |          |      |          |       |          |      |  |  |
| FK872812 | gb FK872812.1 | EST_crog_evp_904731 crog_evp Caligus<br>rogercresseyi cDNA clone<br>crog_evp_506_315_rev 5', mRNA sequence.                                                              | EST_others | 8.88E-02 | -22.8 | -        | 0.0  | -        | -1.4  | -        | 0.0  |  |  |
| FK882798 | gb FK882798.1 | EST_crog_evp_908098 crog_evp Caligus<br>rogercresseyi cDNA clone<br>crog_evp_520_226_rev 5', mRNA sequence.                                                              | EST_others | -        | 2.6   | 7.27E-02 | down | -        | -1.4  | -        | down |  |  |
| FK869364 | gb FK869364.1 | EST_crog_evp_915567 crog_evp Caligus<br>rogercresseyi cDNA clone<br>crog_evp_502_015_fwd 5', mRNA sequence.                                                              | EST_others | -        | 0.00  | 7.64E-03 | down | 2.28E-03 | down  | -        | down |  |  |
| FK879202 | gb FK879202.1 | EST_crog_evp_916574 crog_evp Caligus<br>rogercresseyi cDNA clone<br>crog_evp_515_254_rev 5', mRNA sequence.                                                              | EST_others | 3.75E-02 | down  | -        | down | -        | up    | -        | 0.0  |  |  |
| GW640860 | gb GW640860.1 | EST_isaA_evu_1215038 IsaAevu mixed_tissue<br>Lepeophtheirus salmonis (Atlantic Canada) cDNA<br>Lepeophtheirus salmonis cDNA clone<br>IsaA_evu_506_284_3', mRNA sequence. | EST_others | -        | 5.9   | -        | -1.1 | 8.30E-03 | down  | -        | 1.7  |  |  |
| GE839897 | gb GE839897.1 | EST_omyk_evo_818548 omykevo WBC<br>Oncorhynchus mykiss cDNA Oncorhynchus<br>mykiss cDNA clone omyk_evo_513_148_3',<br>mRNA sequence.                                     | EST_others | -        | -1.6  | -        | -1.3 | 1.82E-03 | -14.9 | -        | 1.5  |  |  |
| GE835715 | gb GE835715.1 | EST_omyk_evo_830394 omykevo WBC<br>Oncorhynchus mykiss cDNA Oncorhynchus<br>mykiss cDNA clone omyk_evo_507_282_5',<br>mRNA sequence.                                     | EST_others | -        | 4.7   | -        | -2.6 | 4.49E-02 | up    | -        | 0.0  |  |  |
| EL553118 | gb EL553118.1 | EST_otsh_evc_1287 otshevc mixed_tissue<br>Oncorhynchus tshawytscha cDNA Oncorhynchus<br>tshawytscha cDNA clone<br>otsh_evc_005_046_fwd 3', mRNA sequence.                | EST_others | -        | -1.7  | -        | -2.6 | -        | up    | 2.48E-03 | 11.5 |  |  |
| EG791873 | gb EG791873.1 | EST_ssal_evd_12006 ssalevd thymus Salmo salar<br>cDNA Salmo salar cDNA clone<br>ssal_evd_514_352_fwd 5', mRNA sequence.                                                  | EST_others | -        | -1.8  | -        | -1.2 | 6.16E-02 | -10.0 | -        | 1.5  |  |  |
| EG793024 | gb EG793024.1 | EST_ssal_evd_13041 ssalevd thymus Salmo salar<br>cDNA Salmo salar cDNA clone<br>ssal_evd_516_121_rev 3', mRNA sequence.                                                  | EST_others | -        | down  | -        | 0.0  | 4.49E-02 | down  | -        | 0.0  |  |  |
| EG795706 | gb EG795706.1 | EST_ssal_evd_15456 ssalevd thymus Salmo salar<br>cDNA Salmo salar cDNA clone<br>ssal_evd_519_242_rev 3', mRNA sequence.                                                  | EST_others | -        | up    | -        | 0.0  | 5.85E-04 | down  | -        | down |  |  |
| EG804652 | gb EG804652.1 | EST_ssal_evd_1707 ssalevd thymus Salmo salar<br>cDNA Salmo salar cDNA clone<br>ssal_evd_006_336_fwd 5', mRNA sequence.                                                   | EST_others | 2.08E-03 | down  | -        | -2.0 | 3.02E-05 | -21.9 | 1.37E-03 | down |  |  |
| EG807134 | gb EG807134.1 | EST_ssal_evd_17813 ssalevd thymus Salmo salar<br>cDNA Salmo salar cDNA clone<br>ssal_evd_522_310_fwd 5', mRNA sequence.                                                  | EST_others | -        | 3.1   | 9.89E-05 | up   | -        | 1.9   | -        | -1.2 |  |  |
| EG822862 | gb EG822862.1 | EST_ssal_evd_24557 ssalevd thymus Salmo salar<br>cDNA Salmo salar cDNA clone                                                                                             | EST_others | -        | up    | 1.49E-02 | down | -        | 0.0   | -        | 0.0  |  |  |



|          |               |                                                                                                                    |            |          |      |          |      |          |       |          |      |  |
|----------|---------------|--------------------------------------------------------------------------------------------------------------------|------------|----------|------|----------|------|----------|-------|----------|------|--|
|          |               | ssal_evd_531_353_fwd 5', mRNA sequence.                                                                            |            |          |      |          |      |          |       |          |      |  |
| EG824531 | gb EG824531.1 | EST_ssai_evd_26059 ssalevd thymus Salmo salar cDNA Salmo salar cDNA clone ssal_evd_533_360_fwd 5', mRNA sequence.  | EST_others | 5.86E-02 | down | -        | 1.0  | -        | -1.9  | -        | 0.0  |  |
| EG824683 | gb EG824683.1 | EST_ssai_evd_26196 ssalevd thymus Salmo salar cDNA Salmo salar cDNA clone ssal_evd_534_047_rev 3', mRNA sequence.  | EST_others | -        | -2.4 | 1.84E-02 | down | -        | -2.3  | -        | down |  |
| EG806136 | gb EG806136.1 | EST_ssai_evd_26841 ssalevd thymus Salmo salar cDNA Salmo salar cDNA clone ssal_evd_535_004_rev 3', mRNA sequence.  | EST_others | -        | 0.00 | 5.59E-02 | down | 2.75E-04 | down  | -        | down |  |
| EG785970 | gb EG785970.1 | EST_ssai_evd_42158 ssalevd thymus Salmo salar cDNA Salmo salar cDNA clone ssal_evd_556_188_fwd 5', mRNA sequence.  | EST_others | 1.18E-03 | down | 2.85E-02 | down | 4.63E-10 | down  | -        | down |  |
| EG776240 | gb EG776240.1 | EST_ssai_evd_51400 ssalevd thymus Salmo salar cDNA Salmo salar cDNA clone ssal_evd_569_098_fwd 5', mRNA sequence.  | EST_others | 4.99E-10 | 88.9 | -        | up   | -        | up    | -        | 0.0  |  |
| EG801892 | gb EG801892.1 | EST_ssai_evd_58485 ssalevd thymus Salmo salar cDNA Salmo salar cDNA clone ssal_evd_578_355_fwd 5', mRNA sequence.  | EST_others | -        | -1.0 | -        | 1.9  | -        | down  | 1.00E-02 | up   |  |
| EG802309 | gb EG802309.1 | EST_ssai_evd_58862 ssalevd thymus Salmo salar cDNA Salmo salar cDNA clone ssal_evd_579_175_rev 3', mRNA sequence.  | EST_others | -        | 4.1  | -        | 9.2  | 8.79E-02 | down  | -        | up   |  |
| EG803435 | gb EG803435.1 | EST_ssai_evd_610 ssalevd thymus Salmo salar cDNA Salmo salar cDNA clone ssal_evd_004_040_fwd 5', mRNA sequence.    | EST_others | -        | 1.1  | -        | up   | 2.24E-02 | -14.3 | -        | 0.0  |  |
| EG835764 | gb EG835764.1 | EST_ssai_eve_10967 ssaleve thyroid Salmo salar cDNA Salmo salar cDNA clone ssal_eve_514_345_fwd 5', mRNA sequence. | EST_others | -        | -1.3 | -        | down | 2.51E-04 | -74.5 | -        | -2.2 |  |
| EG838512 | gb EG838512.1 | EST_ssai_eve_1553 ssaleve thyroid Salmo salar cDNA Salmo salar cDNA clone ssal_eve_501_070_rev 3', mRNA sequence.  | EST_others | 2.20E-02 | 8.1  | -        | 1.0  | -        | 0.0   | -        | up   |  |
| EG855707 | gb EG855707.1 | EST_ssai_eve_16329 ssaleve thyroid Salmo salar cDNA Salmo salar cDNA clone ssal_eve_522_062_fwd 5', mRNA sequence. | EST_others | 1.15E-02 | up   | -        | 0.0  | 3.02E-02 | down  | -        | 0.0  |  |
| EG879755 | gb EG879755.1 | EST_ssai_eve_17542 ssaleve thyroid Salmo salar cDNA Salmo salar cDNA clone ssal_eve_523_359_fwd 5', mRNA sequence. | EST_others | -        | down | -        | 0.0  | 2.43E-02 | down  | -        | 0.0  |  |
| EG879910 | gb EG879910.1 | EST_ssai_eve_17556 ssaleve thyroid Salmo salar cDNA Salmo salar cDNA clone ssal_eve_523_367_rev 3', mRNA sequence. | EST_others | -        | 3.7  | -        | -1.3 | 1.96E-02 | up    | -        | 1.4  |  |
| EG881910 | gb EG881910.1 | EST_ssai_eve_17736 ssaleve thyroid Salmo salar cDNA Salmo salar cDNA clone ssal_eve_524_075_fwd 5', mRNA sequence. | EST_others | -        | down | 3.54E-02 | down | -        | 0.0   | -        | 0.0  |  |
| EG876254 | gb EG876254.1 | EST_ssai_eve_19989 ssaleve thyroid Salmo salar cDNA Salmo salar cDNA clone ssal_eve_527_074_rev 3', mRNA sequence. | EST_others | 3.75E-02 | down | 2.85E-02 | down | -        | -4.5  | -        | 1.8  |  |

|          |               |                                                                                                                    |            |          |       |          |      |          |       |          |      |
|----------|---------------|--------------------------------------------------------------------------------------------------------------------|------------|----------|-------|----------|------|----------|-------|----------|------|
| EG878528 | gb EG878528.1 | EST_ssal_eve_22035 ssaleve thyroid Salmo salar cDNA Salmo salar cDNA clone ssal_eve_529_368_fwd 5', mRNA sequence. | EST_others | 1.27E-03 | 11.8  | -        | up   | -        | 1.8   | -        | 0.0  |
| EG880230 | gb EG880230.1 | EST_ssal_eve_23568 ssaleve thyroid Salmo salar cDNA Salmo salar cDNA clone ssal_eve_532_046_fwd 5', mRNA sequence. | EST_others | -        | 2.7   | -        | -1.2 | 6.99E-02 | up    | -        | -2.9 |
| EG881131 | gb EG881131.1 | EST_ssal_eve_24379 ssaleve thyroid Salmo salar cDNA Salmo salar cDNA clone ssal_eve_533_077_rev 3', mRNA sequence. | EST_others | -        | down  | -        | 6.7  | 9.52E-06 | down  | -        | 0.0  |
| EG882237 | gb EG882237.1 | EST_ssal_eve_25374 ssaleve thyroid Salmo salar cDNA Salmo salar cDNA clone ssal_eve_534_203_fwd 5', mRNA sequence. | EST_others | -        | 21.3  | -        | up   | 6.47E-04 | 33.0  | -        | 4.9  |
| EG882682 | gb EG882682.1 | EST_ssal_eve_25775 ssaleve thyroid Salmo salar cDNA Salmo salar cDNA clone ssal_eve_535_024_rev 3', mRNA sequence. | EST_others | -        | down  | -        | down | 8.79E-02 | down  | -        | down |
| EG866124 | gb EG866124.1 | EST_ssal_eve_27704 ssaleve thyroid Salmo salar cDNA Salmo salar cDNA clone ssal_eve_537_252_fwd 5', mRNA sequence. | EST_others | -        | -1.4  | -        | -1.2 | 5.77E-02 | -5.7  | -        | down |
| EG867991 | gb EG867991.1 | EST_ssal_eve_29384 ssaleve thyroid Salmo salar cDNA Salmo salar cDNA clone ssal_eve_539_349_fwd 5', mRNA sequence. | EST_others | -        | 1.5   | -        | -1.2 | 2.93E-06 | up    | -        | 2.0  |
| EG868203 | gb EG868203.1 | EST_ssal_eve_29575 ssaleve thyroid Salmo salar cDNA Salmo salar cDNA clone ssal_eve_540_067_fwd 5', mRNA sequence. | EST_others | -        | 4.1   | -        | 2.5  | 2.99E-03 | -24.2 | -        | up   |
| EG869982 | gb EG869982.1 | EST_ssal_eve_31176 ssaleve thyroid Salmo salar cDNA Salmo salar cDNA clone ssal_eve_542_125_rev 3', mRNA sequence. | EST_others | 7.42E-04 | down  | -        | down | -        | 0.0   | -        | 0.0  |
| EG870274 | gb EG870274.1 | EST_ssal_eve_31439 ssaleve thyroid Salmo salar cDNA Salmo salar cDNA clone ssal_eve_542_264_fwd 5', mRNA sequence. | EST_others | -        | 4.3   | -        | down | -        | -1.2  | 1.48E-02 | up   |
| EG840326 | gb EG840326.1 | EST_ssal_eve_3187 ssaleve thyroid Salmo salar cDNA Salmo salar cDNA clone ssal_eve_503_137_fwd 5', mRNA sequence.  | EST_others | -        | 5.6   | -        | down | 8.79E-02 | down  | -        | 0.0  |
| EG840695 | gb EG840695.1 | EST_ssal_eve_3520 ssaleve thyroid Salmo salar cDNA Salmo salar cDNA clone ssal_eve_503_306_fwd 5', mRNA sequence.  | EST_others | -        | 1.2   | -        | -1.7 | 7.46E-02 | -6.0  | -        | 1.0  |
| EG844851 | gb EG844851.1 | EST_ssal_eve_37660 ssaleve thyroid Salmo salar cDNA Salmo salar cDNA clone ssal_eve_551_105_fwd 5', mRNA sequence. | EST_others | 5.73E-03 | -11.1 | -        | up   | -        | 0.0   | -        | 0.0  |
| EG833455 | gb EG833455.1 | EST_ssal_eve_45402 ssaleve thyroid Salmo salar cDNA Salmo salar cDNA clone ssal_eve_561_291_rev 3', mRNA sequence. | EST_others | -        | 0.00  | 4.41E-02 | up   | 1.96E-02 | down  | -        | -4.3 |
| EG859641 | gb EG859641.1 | EST_ssal_eve_52969 ssaleve thyroid Salmo salar cDNA Salmo salar cDNA clone ssal_eve_572_066_rev 3', mRNA sequence. | EST_others | -        | -1.7  | -        | -3.1 | 2.33E-02 | -10.8 | -        | -1.1 |
| EG860536 | gb EG860536.1 | EST_ssal_eve_53774 ssaleve thyroid Salmo salar cDNA Salmo salar cDNA clone                                         | EST_others | -        | down  | -        | down | 2.43E-02 | down  | -        | down |

|          |               |                                                                                                                         |            |          |       |          |      |          |       |          |      |  |
|----------|---------------|-------------------------------------------------------------------------------------------------------------------------|------------|----------|-------|----------|------|----------|-------|----------|------|--|
|          |               | ssal_eve_573_104_rev 3', mRNA sequence.                                                                                 |            |          |       |          |      |          |       |          |      |  |
| EG849257 | gb EG849257.1 | EST_ssal_eve_6723 ssalevf thyroid Salmo salar cDNA Salmo salar cDNA clone ssal_eve_508_052_rev 3', mRNA sequence.       | EST_others | -        | -2.7  | -        | down | 6.99E-02 | down  | -        | 0.0  |  |
| EG907993 | gb EG907993.1 | EST_ssal_evf_10351 ssalevf mixed_tissue Salmo salar cDNA Salmo salar cDNA clone ssal_evf_512_085_rev 3', mRNA sequence. | EST_others | -        | 0.00  | -        | 0.0  | 7.05E-02 | -26.3 | -        | 0.0  |  |
| EG908200 | gb EG908200.1 | EST_ssal_evf_10537 ssalevf mixed_tissue Salmo salar cDNA Salmo salar cDNA clone ssal_evf_512_182_rev 3', mRNA sequence. | EST_others | -        | -2.9  | -        | -1.4 | 3.24E-03 | down  | -        | 3.5  |  |
| EG908809 | gb EG908809.1 | EST_ssal_evf_11085 ssalevf mixed_tissue Salmo salar cDNA Salmo salar cDNA clone ssal_evf_513_091_rev 3', mRNA sequence. | EST_others | -        | down  | -        | down | 4.54E-05 | down  | -        | down |  |
| EG911244 | gb EG911244.1 | EST_ssal_evf_13277 ssalevf mixed_tissue Salmo salar cDNA Salmo salar cDNA clone ssal_evf_516_098_fwd 5', mRNA sequence. | EST_others | -        | -2.5  | -        | -1.8 | 5.01E-02 | -6.8  | -        | up   |  |
| EG912415 | gb EG912415.1 | EST_ssal_evf_14331 ssalevf mixed_tissue Salmo salar cDNA Salmo salar cDNA clone ssal_evf_517_261_rev 3', mRNA sequence. | EST_others | -        | 0.00  | -        | -3.4 | -        | -1.6  | 7.68E-02 | down |  |
| EG913326 | gb EG913326.1 | EST_ssal_evf_15151 ssalevf mixed_tissue Salmo salar cDNA Salmo salar cDNA clone ssal_evf_518_298_fwd 5', mRNA sequence. | EST_others | -        | 0.00  | -        | down | 3.65E-02 | down  | -        | down |  |
| EG914877 | gb EG914877.1 | EST_ssal_evf_16547 ssalevf mixed_tissue Salmo salar cDNA Salmo salar cDNA clone ssal_evf_520_246_fwd 5', mRNA sequence. | EST_others | -        | 2.8   | -        | 1.0  | 4.22E-03 | -13.1 | -        | 1.0  |  |
| EG942150 | gb EG942150.1 | EST_ssal_evf_17594 ssalevf mixed_tissue Salmo salar cDNA Salmo salar cDNA clone ssal_evf_522_020_fwd 5', mRNA sequence. | EST_others | -        | 2.4   | -        | down | 7.56E-02 | -6.0  | -        | down |  |
| EG922711 | gb EG922711.1 | EST_ssal_evf_1797 ssalevf mixed_tissue Salmo salar cDNA Salmo salar cDNA clone ssal_evf_006_217_fwd 5', mRNA sequence.  | EST_others | -        | down  | -        | 0.0  | 3.11E-02 | -15.9 | -        | 0.0  |  |
| EG935627 | gb EG935627.1 | EST_ssal_evf_19632 ssalevf mixed_tissue Salmo salar cDNA Salmo salar cDNA clone ssal_evf_524_301_fwd 5', mRNA sequence. | EST_others | 3.15E-02 | down  | -        | -1.1 | 7.15E-02 | -5.1  | -        | -1.1 |  |
| EG937327 | gb EG937327.1 | EST_ssal_evf_21163 ssalevf mixed_tissue Salmo salar cDNA Salmo salar cDNA clone ssal_evf_526_319_fwd 5', mRNA sequence. | EST_others | -        | -1.5  | 2.85E-02 | down | -        | 1.1   | -        | 1.3  |  |
| EG937416 | gb EG937416.1 | EST_ssal_evf_21243 ssalevf mixed_tissue Salmo salar cDNA Salmo salar cDNA clone ssal_evf_526_359_fwd 5', mRNA sequence. | EST_others | -        | 0.00  | -        | 2.9  | 4.49E-02 | up    | -        | 1.9  |  |
| EG942312 | gb EG942312.1 | EST_ssal_evf_25650 ssalevf mixed_tissue Salmo salar cDNA Salmo salar cDNA clone ssal_evf_533_370_fwd 5', mRNA sequence. | EST_others | -        | -12.9 | -        | down | 2.07E-03 | -13.1 | -        | -5.4 |  |
| EG899717 | gb EG899717.1 | EST_ssal_evf_2676 ssalevf mixed_tissue Salmo salar cDNA Salmo salar cDNA clone ssal_evf_501_329_rev 3', mRNA sequence.  | EST_others | -        | down  | -        | -1.4 | 3.54E-02 | 7.2   | -        | down |  |

|          |               |                                                                                                                         |            |          |      |          |      |          |        |          |       |
|----------|---------------|-------------------------------------------------------------------------------------------------------------------------|------------|----------|------|----------|------|----------|--------|----------|-------|
| EG926272 | gb EG926272.1 | EST_ssal_evf_28802 ssalevf mixed_tissue Salmo salar cDNA Salmo salar cDNA clone ssal_evf_538_075_rev 3', mRNA sequence. | EST_others | -        | 0.00 | -        | down | 2.43E-02 | down   | -        | down  |
| EG903128 | gb EG903128.1 | EST_ssal_evf_2983 ssalevf mixed_tissue Salmo salar cDNA Salmo salar cDNA clone ssal_evf_502_106_rev 3', mRNA sequence.  | EST_others | -        | down | 5.20E-03 | down | 2.70E-08 | down   | -        | down  |
| EG928582 | gb EG928582.1 | EST_ssal_evf_30881 ssalevf mixed_tissue Salmo salar cDNA Salmo salar cDNA clone ssal_evf_540_380_rev 3', mRNA sequence. | EST_others | -        | down | -        | down | 5.65E-02 | down   | -        | down  |
| EG931057 | gb EG931057.1 | EST_ssal_evf_33109 ssalevf mixed_tissue Salmo salar cDNA Salmo salar cDNA clone ssal_evf_544_009_fwd 5', mRNA sequence. | EST_others | -        | down | -        | 0.0  | -        | down   | 3.00E-03 | -15.0 |
| EG932783 | gb EG932783.1 | EST_ssal_evf_34663 ssalevf mixed_tissue Salmo salar cDNA Salmo salar cDNA clone ssal_evf_546_047_fwd 5', mRNA sequence. | EST_others | -        | -1.1 | -        | 1.3  | -        | -1.7   | 5.91E-02 | up    |
| EG889573 | gb EG889573.1 | EST_ssal_evf_3563 ssalevf mixed_tissue Salmo salar cDNA Salmo salar cDNA clone ssal_evf_503_025_rev 3', mRNA sequence.  | EST_others | -        | 1.6  | 4.41E-02 | up   | -        | 3.3    | -        | up    |
| EG934489 | gb EG934489.1 | EST_ssal_evf_36198 ssalevf mixed_tissue Salmo salar cDNA Salmo salar cDNA clone ssal_evf_548_077_fwd 5', mRNA sequence. | EST_others | 9.28E-02 | up   | -        | up   | -        | up     | -        | down  |
| EG898924 | gb EG898924.1 | EST_ssal_evf_37933 ssalevf mixed_tissue Salmo salar cDNA Salmo salar cDNA clone ssal_evf_550_226_fwd 5', mRNA sequence. | EST_others | 1.53E-03 | down | -        | down | 2.73E-05 | down   | 1.18E-03 | down  |
| EG901696 | gb EG901696.1 | EST_ssal_evf_40428 ssalevf mixed_tissue Salmo salar cDNA Salmo salar cDNA clone ssal_evf_553_372_rev 3', mRNA sequence. | EST_others | -        | -2.5 | -        | 1.0  | 1.60E-02 | -18.6  | -        | down  |
| EG902053 | gb EG902053.1 | EST_ssal_evf_40749 ssalevf mixed_tissue Salmo salar cDNA Salmo salar cDNA clone ssal_evf_554_152_rev 3', mRNA sequence. | EST_others | -        | 1.0  | -        | -2.1 | 3.65E-02 | down   | -        | 0.0   |
| EG885127 | gb EG885127.1 | EST_ssal_evf_43515 ssalevf mixed_tissue Salmo salar cDNA Salmo salar cDNA clone ssal_evf_558_059_rev 3', mRNA sequence. | EST_others | 2.00E-02 | down | -        | -2.5 | -        | -1.6   | -        | 1.3   |
| EG885488 | gb EG885488.1 | EST_ssal_evf_43840 ssalevf mixed_tissue Salmo salar cDNA Salmo salar cDNA clone ssal_evf_558_225_rev 3', mRNA sequence. | EST_others | -        | -2.5 | -        | -3.0 | 2.28E-03 | down   | -        | -2.7  |
| EG886211 | gb EG886211.1 | EST_ssal_evf_44490 ssalevf mixed_tissue Salmo salar cDNA Salmo salar cDNA clone ssal_evf_559_176_rev 3', mRNA sequence. | EST_others | -        | up   | -        | 0.0  | 2.73E-05 | -103.6 | -        | down  |
| EG888853 | gb EG888853.1 | EST_ssal_evf_46868 ssalevf mixed_tissue Salmo salar cDNA Salmo salar cDNA clone ssal_evf_562_243_fwd 5', mRNA sequence. | EST_others | -        | 1.5  | 2.07E-03 | down | -        | 2.2    | -        | 1.7   |
| EG889122 | gb EG889122.1 | EST_ssal_evf_47111 ssalevf mixed_tissue Salmo salar cDNA Salmo salar cDNA clone ssal_evf_562_369_rev 3', mRNA sequence. | EST_others | -        | 0.00 | -        | -3.7 | 6.99E-02 | down   | -        | -2.0  |
| EG890543 | gb EG890543.1 | EST_ssal_evf_48390 ssalevf mixed_tissue Salmo salar cDNA Salmo salar cDNA clone                                         | EST_others | -        | down | -        | down | 4.20E-04 | down   | -        | 0.0   |

|          |               |                                                                                                                           |            |          |      |          |       |          |       |   |      |  |
|----------|---------------|---------------------------------------------------------------------------------------------------------------------------|------------|----------|------|----------|-------|----------|-------|---|------|--|
|          |               | ssal_evf_564_275_rev 3', mRNA sequence.                                                                                   |            |          |      |          |       |          |       |   |      |  |
| EG893526 | gb EG893526.1 | EST_ssal_evf_51075 ssalevf mixed_tissue Salmo salar cDNA Salmo salar cDNA clone ssal_evf_568_136_fwd 5', mRNA sequence.   | EST_others | -        | 2.0  | -        | -1.1  | 3.11E-02 | -7.1  | - | down |  |
| EG917093 | gb EG917093.1 | EST_ssal_evf_56281 ssalevf mixed_tissue Salmo salar cDNA Salmo salar cDNA clone ssal_evf_575_185_rev 3', mRNA sequence.   | EST_others | -        | down | -        | down  | 2.77E-03 | down  | - | up   |  |
| EG917122 | gb EG917122.1 | EST_ssal_evf_56307 ssalevf mixed_tissue Salmo salar cDNA Salmo salar cDNA clone ssal_evf_575_198_fwd 5', mRNA sequence.   | EST_others | -        | -3.3 | 1.50E-03 | down  | 1.61E-05 | down  | - | 1.1  |  |
| EG918173 | gb EG918173.1 | EST_ssal_evf_57254 ssalevf mixed_tissue Salmo salar cDNA Salmo salar cDNA clone ssal_evf_576_303_rev 3', mRNA sequence.   | EST_others | -        | 2.1  | -        | 9.4   | 8.10E-03 | 10.2  | - | 2.5  |  |
| EG918652 | gb EG918652.1 | EST_ssal_evf_57684 ssalevf mixed_tissue Salmo salar cDNA Salmo salar cDNA clone ssal_evf_577_153_fwd 5', mRNA sequence.   | EST_others | -        | down | -        | down  | 8.78E-02 | -24.8 | - | -2.2 |  |
| EG920601 | gb EG920601.1 | EST_ssal_evf_59439 ssalevf mixed_tissue Salmo salar cDNA Salmo salar cDNA clone ssal_evf_579_333_rev 3', mRNA sequence.   | EST_others | -        | down | -        | -2.1  | 8.79E-02 | down  | - | 0.0  |  |
| EG904422 | gb EG904422.1 | EST_ssal_evf_7136 ssalevf mixed_tissue Salmo salar cDNA Salmo salar cDNA clone ssal_evf_507_333_fwd 5', mRNA sequence.    | EST_others | -        | 0.00 | -        | 0.0   | 1.59E-02 | down  | - | 0.0  |  |
| EG907324 | gb EG907324.1 | EST_ssal_evf_9748 ssalevf mixed_tissue Salmo salar cDNA Salmo salar cDNA clone ssal_evf_511_154_fwd 5', mRNA sequence.    | EST_others | -        | 0.00 | -        | 1.2   | 6.84E-03 | up    | - | 23.1 |  |
| DW532716 | gb DW532716.1 | EST_ssal_plnb_1352 plnb Salmo salar cDNA clone ssal_plnb_011_015_fwd 3', mRNA sequence.                                   | EST_others | -        | 0.00 | 3.98E-06 | -37.4 | -        | 0.0   | - | 0.0  |  |
| DW533681 | gb DW533681.1 | EST_ssal_plnb_2317 plnb Salmo salar cDNA clone ssal_plnb_017_093_rev 5', mRNA sequence.                                   | EST_others | -        | 0.00 | 6.22E-03 | down  | -        | 0.0   | - | 0.0  |  |
| DW533803 | gb DW533803.1 | EST_ssal_plnb_2439 plnb Salmo salar cDNA clone ssal_plnb_018_088_fwd 3', mRNA sequence.                                   | EST_others | -        | -1.6 | 5.76E-04 | up    | -        | up    | - | 0.0  |  |
| DY692525 | gb DY692525.1 | EST_ssal_plnb_5435 ssalplnb mixed_tissue Salmo salar cDNA Salmo salar cDNA clone ssal_plnb_025_377_fwd 3', mRNA sequence. | EST_others | 5.86E-02 | down | 5.59E-02 | down  | -        | down  | - | down |  |
| DY692639 | gb DY692639.1 | EST_ssal_plnb_5549 ssalplnb mixed_tissue Salmo salar cDNA Salmo salar cDNA clone ssal_plnb_027_058_fwd 3', mRNA sequence. | EST_others | -        | 0.00 | 1.75E-03 | -21.5 | -        | up    | - | -4.3 |  |
| EG755292 | gb EG755292.1 | EST_ssal_plnb_6444 ssalplnb mixed_tissue Salmo salar cDNA Salmo salar cDNA clone ssal_plnb_029_080_fwd 3', mRNA sequence. | EST_others | -        | 0.00 | 5.59E-02 | down  | -        | 0.0   | - | 0.0  |  |
| DW557302 | gb DW557302.1 | EST_ssal_rgb2_21721 rgb2 Salmo salar cDNA clone ssal_rgb2_535_127_rev 5', mRNA sequence.                                  | EST_others | 6.83E-05 | up   | -        | 3.8   | -        | up    | - | down |  |

|          |               |                                                                                                                            |            |          |      |          |       |          |       |   |      |
|----------|---------------|----------------------------------------------------------------------------------------------------------------------------|------------|----------|------|----------|-------|----------|-------|---|------|
| DW557640 | gb DW557640.1 | EST_ssal_rgb2_22059 rgb2 Salmo salar cDNA clone ssal_rgb2_535_331_rev 5', mRNA sequence.                                   | EST_others | -        | -1.3 | -        | -2.1  | 6.85E-02 | -11.0 | - | -4.3 |
| DW565146 | gb DW565146.1 | EST_ssal_rgb2_29565 rgb2 Salmo salar cDNA clone ssal_rgb2_547_373_rev 5', mRNA sequence.                                   | EST_others | 5.86E-02 | down | -        | down  | 3.59E-04 | -27.7 | - | 1.8  |
| DW565771 | gb DW565771.1 | EST_ssal_rgb2_30190 rgb2 Salmo salar cDNA clone ssal_rgb2_548_373_rev 5', mRNA sequence.                                   | EST_others | -        | 0.00 | -        | 8.7   | 7.05E-02 | 18.8  | - | 0.0  |
| DW566521 | gb DW566521.1 | EST_ssal_rgb2_30940 rgb2 Salmo salar cDNA clone ssal_rgb2_550_051_rev 5', mRNA sequence.                                   | EST_others | -        | down | 9.39E-03 | down  | -        | down  | - | 0.0  |
| DW567486 | gb DW567486.1 | EST_ssal_rgb2_31905 rgb2 Salmo salar cDNA clone ssal_rgb2_551_261_rev 5', mRNA sequence.                                   | EST_others | -        | 3.2  | -        | 6.8   | 3.92E-03 | 12.8  | - | -1.1 |
| DW568758 | gb DW568758.1 | EST_ssal_rgb2_33177 rgb2 Salmo salar cDNA clone ssal_rgb2_553_284_rev 5', mRNA sequence.                                   | EST_others | 6.54E-03 | down | 7.76E-04 | down  | 8.45E-06 | down  | - | 0.0  |
| DW570084 | gb DW570084.1 | EST_ssal_rgb2_34503 rgb2 Salmo salar cDNA clone ssal_rgb2_555_329_fwd 3', mRNA sequence.                                   | EST_others | -        | 0.00 | 3.65E-03 | -17.2 | -        | 0.0   | - | down |
| DW539469 | gb DW539469.1 | EST_ssal_rgb2_3888 rgb2 Salmo salar cDNA clone ssal_rgb2_507_270_rev 5', mRNA sequence.                                    | EST_others | -        | -4.2 | -        | down  | 6.99E-02 | up    | - | up   |
| DW575959 | gb DW575959.1 | EST_ssal_rgb2_40378 rgb2 Salmo salar cDNA clone ssal_rgb2_565_232_fwd 3', mRNA sequence.                                   | EST_others | -        | -6.9 | -        | up    | 4.49E-02 | down  | - | 0.0  |
| DW576807 | gb DW576807.1 | EST_ssal_rgb2_41226 rgb2 Salmo salar cDNA clone ssal_rgb2_566_338_rev 5', mRNA sequence.                                   | EST_others | -        | 2.4  | -        | -6.2  | 1.36E-02 | -19.3 | - | -1.1 |
| DW577325 | gb DW577325.1 | EST_ssal_rgb2_41744 rgb2 Salmo salar cDNA clone ssal_rgb2_567_258_rev 5', mRNA sequence.                                   | EST_others | -        | down | -        | down  | 7.89E-04 | down  | - | down |
| DW578341 | gb DW578341.1 | EST_ssal_rgb2_42760 rgb2 Salmo salar cDNA clone ssal_rgb2_569_121_rev 5', mRNA sequence.                                   | EST_others | -        | 1.2  | 3.54E-02 | down  | -        | up    | - | down |
| DW581115 | gb DW581115.1 | EST_ssal_rgb2_45534 rgb2 Salmo salar cDNA clone ssal_rgb2_573_258_rev 5', mRNA sequence.                                   | EST_others | -        | 2.1  | -        | 3.5   | 1.96E-03 | up    | - | up   |
| DY697537 | gb DY697537.1 | EST_ssal_rgb2_53276 ssalrgb2 mixed_tissue Salmo salar cDNA Salmo salar cDNA clone ssal_rgb2_586_071_fwd 3', mRNA sequence. | EST_others | -        | 0.00 | -        | 0.0   | 3.02E-02 | down  | - | 0.0  |
| DW541038 | gb DW541038.1 | EST_ssal_rgb2_5457 rgb2 Salmo salar cDNA clone ssal_rgb2_510_041_rev 5', mRNA sequence.                                    | EST_others | -        | down | -        | down  | 3.65E-02 | down  | - | down |
| DY701339 | gb DY701339.1 | EST_ssal_rgb2_57078 ssalrgb2 mixed_tissue Salmo salar cDNA Salmo salar cDNA clone                                          | EST_others | -        | down | -        | down  | 7.24E-05 | down  | - | down |

|          |               |                                                                                                                                  |            |          |      |          |       |          |       |          |   |      |
|----------|---------------|----------------------------------------------------------------------------------------------------------------------------------|------------|----------|------|----------|-------|----------|-------|----------|---|------|
|          |               | ssal_rgb2_592_062_fwd 3', mRNA sequence.                                                                                         |            |          |      |          |       |          |       |          |   |      |
| DY705472 | gb DY705472.1 | EST_ssal_rgb2_61211 ssalrgb2 mixed_tissue Salmo salar cDNA Salmo salar cDNA clone ssal_rgb2_598_195_fwd 3', mRNA sequence.       | EST_others | -        | 0.00 | 4.56E-06 | -40.6 | -        | 0.0   | -        | - | down |
| DW542323 | gb DW542323.1 | EST_ssal_rgb2_6742 rgb2 Salmo salar cDNA clone ssal_rgb2_512_028_rev 5', mRNA sequence.                                          | EST_others | -        | 1.2  | 4.41E-02 | down  | -        | -2.7  | -        | - | -1.1 |
| DY715145 | gb DY715145.1 | EST_ssal_rgb2_70885 ssalrgb2 mixed_tissue Salmo salar cDNA Salmo salar cDNA clone ssal_rgb2_614_342_rev 5', mRNA sequence.       | EST_others | -        | down | -        | up    | -        | up    | 1.57E-03 |   | up   |
| DY715437 | gb DY715437.1 | EST_ssal_rgb2_71177 ssalrgb2 mixed_tissue Salmo salar cDNA Salmo salar cDNA clone ssal_rgb2_615_142_fwd 3', mRNA sequence.       | EST_others | -        | down | -        | 0.0   | 4.39E-02 | -15.2 | -        | - | 0.0  |
| DY715711 | gb DY715711.1 | EST_ssal_rgb2_71451 ssalrgb2 mixed_tissue Salmo salar cDNA Salmo salar cDNA clone ssal_rgb2_615_305_rev 5', mRNA sequence.       | EST_others | -        | up   | 3.88E-05 | up    | -        | -1.7  | 7.28E-04 |   | up   |
| DY720448 | gb DY720448.1 | EST_ssal_rgb2_76187 ssalrgb2 mixed_tissue Salmo salar cDNA Salmo salar cDNA clone ssal_rgb2_625_087_rev 5', mRNA sequence.       | EST_others | -        | 0.00 | 2.44E-06 | -48.0 | -        | 0.0   | -        | - | up   |
| DY720838 | gb DY720838.1 | EST_ssal_rgb2_76577 ssalrgb2 mixed_tissue Salmo salar cDNA Salmo salar cDNA clone ssal_rgb2_625_311_fwd 3', mRNA sequence.       | EST_others | -        | 0.00 | -        | -1.4  | 4.41E-02 | -13.0 | -        | - | down |
| DY726856 | gb DY726856.1 | EST_ssal_rgb2_82595 ssalrgb2 mixed_tissue Salmo salar cDNA Salmo salar cDNA clone ssal_rgb2_635_205_fwd 3', mRNA sequence.       | EST_others | 1.81E-04 | up   | -        | up    | -        | 1.1   | -        | - | 0.0  |
| DY729177 | gb DY729177.1 | EST_ssal_rgb2_84916 ssalrgb2 mixed_tissue Salmo salar cDNA Salmo salar cDNA clone ssal_rgb2_639_034_rev 5', mRNA sequence.       | EST_others | 1.34E-03 | down | 9.01E-02 | down  | 1.28E-02 | down  | -        | - | -1.6 |
| DY735271 | gb DY735271.1 | EST_ssal_rgb2_91010 ssalrgb2 mixed_tissue Salmo salar cDNA Salmo salar cDNA clone ssal_rgb2_649_009_fwd 3', mRNA sequence.       | EST_others | -        | -1.7 | -        | 1.3   | 2.69E-02 | -21.7 | -        | - | up   |
| DY735321 | gb DY735321.1 | EST_ssal_rgb2_91060 ssalrgb2 mixed_tissue Salmo salar cDNA Salmo salar cDNA clone ssal_rgb2_649_040_rev 5', mRNA sequence.       | EST_others | -        | 0.00 | -        | 0.0   | -        | 0.0   | 5.87E-02 |   | 24.1 |
| DY735436 | gb DY735436.1 | EST_ssal_rgb2_91175 ssalrgb2 mixed_tissue Salmo salar cDNA Salmo salar cDNA clone ssal_rgb2_649_104_fwd 3', mRNA sequence.       | EST_others | -        | 1.2  | -        | 0.0   | 8.79E-02 | down  | -        | - | down |
| DY737082 | gb DY737082.1 | EST_ssal_rgb2_92821 ssalrgb2 mixed_tissue Salmo salar cDNA Salmo salar cDNA clone ssal_rgb2_651_303_rev 5', mRNA sequence.       | EST_others | -        | -1.3 | -        | -3.6  | 4.39E-02 | -15.2 | -        | - | up   |
| DW545057 | gb DW545057.1 | EST_ssal_rgb2_9476 rgb2 Salmo salar cDNA clone ssal_rgb2_516_105_rev 5', mRNA sequence.                                          | EST_others | 4.69E-02 | down | -        | 1.2   | -        | 2.8   | -        | - | 1.1  |
| GE767884 | gb GE767884.1 | EST_ssal_rgf_835799 ssalrgf mixed_tissue full-length Salmo salar cDNA Salmo salar cDNA clone ssal_rgf_002_311_3', mRNA sequence. | EST_others | -        | -2.1 | 5.59E-02 | down  | 5.88E-06 | -48.9 | -        | - | down |

|          |               |                                                                                                                                   |            |          |      |          |      |          |       |          |      |
|----------|---------------|-----------------------------------------------------------------------------------------------------------------------------------|------------|----------|------|----------|------|----------|-------|----------|------|
| GE775959 | gb GE775959.1 | EST_ssal_rgf_839262 ssalrgf mixed_tissue full-length Salmo salar cDNA Salmo salar cDNA clone ssal_rgf_511_318 5', mRNA sequence.  | EST_others | -        | 8.7  | -        | 3.1  | 7.05E-02 | 18.1  | -        | -1.1 |
| GE780214 | gb GE780214.1 | EST_ssal_rgf_846100 ssalrgf mixed_tissue full-length Salmo salar cDNA Salmo salar cDNA clone ssal_rgf_517_244 5', mRNA sequence.  | EST_others | -        | -1.3 | -        | -2.4 | 8.79E-02 | down  | -        | down |
| GE795073 | gb GE795073.1 | EST_ssal_rgf_858837 ssalrgf mixed_tissue full-length Salmo salar cDNA Salmo salar cDNA clone ssal_rgf_539_117 3', mRNA sequence.  | EST_others | -        | down | -        | down | 6.99E-02 | down  | -        | 0.0  |
| GE783177 | gb GE783177.1 | EST_ssal_rgf_863208 ssalrgf mixed_tissue full-length Salmo salar cDNA Salmo salar cDNA clone ssal_rgf_521_264 5', mRNA sequence.  | EST_others | -        | 0.00 | -        | down | 8.79E-02 | down  | -        | 0.0  |
| GE794330 | gb GE794330.1 | EST_ssal_rgf_864206 ssalrgf mixed_tissue full-length Salmo salar cDNA Salmo salar cDNA clone ssal_rgf_538_110 3', mRNA sequence.  | EST_others | -        | 1.3  | -        | -2.0 | -        | -1.0  | 6.26E-06 | 60.2 |
| GE792696 | gb GE792696.1 | EST_ssal_rgf_869097 ssalrgf mixed_tissue full-length Salmo salar cDNA Salmo salar cDNA clone ssal_rgf_536_009 3', mRNA sequence.  | EST_others | -        | -1.5 | 2.18E-02 | -6.3 | -        | 1.0   | -        | 1.9  |
| GE793450 | gb GE793450.1 | EST_ssal_rgf_872948 ssalrgf mixed_tissue full-length Salmo salar cDNA Salmo salar cDNA clone ssal_rgf_537_020 3', mRNA sequence.  | EST_others | -        | up   | -        | 1.4  | 2.43E-02 | up    | -        | 0.0  |
| GO044564 | gb GO044564.1 | EST_ssal_rgg_1026006 ssalrgg mixed_tissue full-length Salmo salar cDNA Salmo salar cDNA clone ssal_rgg_505_246 5', mRNA sequence. | EST_others | 1.61E-02 | down | -        | -1.8 | 9.10E-02 | -5.6  | -        | down |
| GO045464 | gb GO045464.1 | EST_ssal_rgg_1095730 ssalrgg mixed_tissue full-length Salmo salar cDNA Salmo salar cDNA clone ssal_rgg_507_082 3', mRNA sequence. | EST_others | -        | -2.2 | -        | -2.6 | 8.30E-03 | -17.0 | -        | -1.2 |
| GO045318 | gb GO045318.1 | EST_ssal_rgg_1101007 ssalrgg mixed_tissue full-length Salmo salar cDNA Salmo salar cDNA clone ssal_rgg_506_367 3', mRNA sequence. | EST_others | -        | 20.1 | -        | up   | 4.67E-03 | down  | -        | 1.5  |
| GO054151 | gb GO054151.1 | EST_ssal_rgh_1035036 ssalrgh mixed_tissue full-length Salmo salar cDNA Salmo salar cDNA clone ssal_rgh_502_060 5', mRNA sequence. | EST_others | -        | down | 3.54E-02 | down | -        | -1.6  | -        | -6.8 |
| GO055970 | gb GO055970.1 | EST_ssal_rgh_1044020 ssalrgh mixed_tissue full-length Salmo salar cDNA Salmo salar cDNA clone ssal_rgh_505_212 5', mRNA sequence. | EST_others | -        | 0.00 | 4.41E-02 | up   | -        | up    | -        | 8.4  |
| GO063143 | gb GO063143.1 | EST_ssal_rgh_1079043 ssalrgh mixed_tissue full-length Salmo salar cDNA Salmo salar cDNA clone ssal_rgh_517_291 3', mRNA sequence. | EST_others | -        | down | -        | down | 3.90E-03 | down  | -        | down |
| GO064603 | gb GO064603.1 | EST_ssal_rgh_1079613 ssalrgh mixed_tissue full-length Salmo salar cDNA Salmo salar cDNA clone ssal_rgh_520_093 5', mRNA sequence. | EST_others | -        | 0.00 | -        | 0.0  | 1.22E-03 | down  | -        | 0.0  |
| GO061981 | gb GO061981.1 | EST_ssal_rgh_1080223 ssalrgh mixed_tissue full-length Salmo salar cDNA Salmo salar cDNA clone ssal_rgh_515_319 3', mRNA sequence. | EST_others | -        | -5.2 | 3.54E-02 | -6.5 | 7.44E-06 | -31.5 | -        | -8.6 |
| GO057448 | gb GO057448.1 | EST_ssal_rgh_1083386 ssalrgh mixed_tissue full-length Salmo salar cDNA Salmo salar cDNA clone                                     | EST_others | -        | -1.9 | 3.54E-02 | up   | 6.99E-02 | up    | -        | 1.3  |



|          |               |                                                                                                                                   |            |   |      |          |       |          |       |          |      |  |
|----------|---------------|-----------------------------------------------------------------------------------------------------------------------------------|------------|---|------|----------|-------|----------|-------|----------|------|--|
|          |               | ssal_rgh_508_026 3', mRNA sequence.                                                                                               |            |   |      |          |       |          |       |          |      |  |
| GO057929 | gb GO057929.1 | EST_ssal_rgh_1083694 ssalrgh mixed_tissue full-length Salmo salar cDNA Salmo salar cDNA clone ssal_rgh_508_334 3', mRNA sequence. | EST_others | - | -6.8 | -        | -2.1  | 1.28E-06 | down  | -        | down |  |
| GO062248 | gb GO062248.1 | EST_ssal_rgh_1083855 ssalrgh mixed_tissue full-length Salmo salar cDNA Salmo salar cDNA clone ssal_rgh_516_111 5', mRNA sequence. | EST_others | - | -1.5 | -        | 1.1   | 1.42E-03 | -9.3  | -        | -1.6 |  |
| GO059796 | gb GO059796.1 | EST_ssal_rgh_1086096 ssalrgh mixed_tissue full-length Salmo salar cDNA Salmo salar cDNA clone ssal_rgh_512_048 5', mRNA sequence. | EST_others | - | 0.00 | -        | down  | 3.90E-03 | down  | -        | down |  |
| GO064045 | gb GO064045.1 | EST_ssal_rgh_1086921 ssalrgh mixed_tissue full-length Salmo salar cDNA Salmo salar cDNA clone ssal_rgh_519_105 3', mRNA sequence. | EST_others | - | -4.2 | -        | -4.1  | 6.65E-06 | -25.5 | -        | down |  |
| GO058122 | gb GO058122.1 | EST_ssal_rgh_1088428 ssalrgh mixed_tissue full-length Salmo salar cDNA Salmo salar cDNA clone ssal_rgh_509_076 5', mRNA sequence. | EST_others | - | 0.00 | 5.59E-02 | up    | -        | 0.0   | -        | -1.4 |  |
| GO059623 | gb GO059623.1 | EST_ssal_rgh_1089059 ssalrgh mixed_tissue full-length Salmo salar cDNA Salmo salar cDNA clone ssal_rgh_511_323 3', mRNA sequence. | EST_others | - | down | -        | down  | 5.66E-03 | down  | -        | down |  |
| GO060238 | gb GO060238.1 | EST_ssal_rgh_1090227 ssalrgh mixed_tissue full-length Salmo salar cDNA Salmo salar cDNA clone ssal_rgh_512_339 3', mRNA sequence. | EST_others | - | -3.2 | -        | -7.9  | 2.51E-04 | -37.3 | -        | 0.0  |  |
| EG757222 | gb EG757222.1 | EST_ssal_sjb_5903 ssalsjb mixed_tissue Salmo salar cDNA Salmo salar cDNA clone ssal_sjb_013_245_fwd 3', mRNA sequence.            | EST_others | - | down | -        | 0.0   | 3.76E-02 | -11.4 | -        | 0.0  |  |
| EG757601 | gb EG757601.1 | EST_ssal_sjb_6246 ssalsjb mixed_tissue Salmo salar cDNA Salmo salar cDNA clone ssal_sjb_014_052_rev 5', mRNA sequence.            | EST_others | - | -1.2 | -        | 1.1   | 4.79E-06 | up    | -        | 1.7  |  |
| BF228600 | gb BF228600.1 | EST00311 Atlantic salmon Lambda Zap Express brain cDNA library Salmo salar cDNA clone BNM-134 5', mRNA sequence.                  | EST_others | - | up   | -        | 1.9   | 8.79E-02 | up    | -        | 0.0  |  |
| CK873433 | gb CK873433.1 | SGP134561 Atlantic salmon Brain cDNA library Salmo salar cDNA clone HJ6-0532 5', mRNA sequence.                                   | EST_others | - | -2.5 | 7.27E-02 | up    | -        | 1.3   | -        | 1.4  |  |
| CK873617 | gb CK873617.1 | SGP134767 Atlantic salmon Brain cDNA library Salmo salar cDNA clone HJ6-0878 5', mRNA sequence.                                   | EST_others | - | 0.00 | -        | 0.0   | -        | 0.0   | 1.36E-04 | down |  |
| CK876604 | gb CK876604.1 | SGP137887 Atlantic salmon Eye cDNA library Salmo salar cDNA clone OY4-0782 5', mRNA sequence.                                     | EST_others | - | 3.6  | -        | 2.4   | -        | down  | 7.44E-07 | 60.1 |  |
| CK893686 | gb CK893686.1 | SGP153778 Atlantic salmon Spleen cDNA library Salmo salar cDNA clone MI6-0365 5', mRNA sequence.                                  | EST_others | - | 1.2  | -        | -10.2 | 2.47E-02 | -11.3 | -        | 1.0  |  |
| CK899155 | gb CK899155.1 | SGP162743 Atlantic salmon Testis cDNA library Salmo salar cDNA clone MG4-1507 5', mRNA sequence.                                  | EST_others | - | down | -        | down  | 5.66E-03 | down  | -        | down |  |

|          |               |                                                                                                                                                                                                    |            |          |      |          |       |          |       |          |      |
|----------|---------------|----------------------------------------------------------------------------------------------------------------------------------------------------------------------------------------------------|------------|----------|------|----------|-------|----------|-------|----------|------|
| CK885162 | gb CK885162.1 | SGP165529 Atlantic salmon Intestine cDNA library Salmo salar cDNA clone T4-0448 5', mRNA sequence.                                                                                                 | EST_others | -        | 0.00 | -        | -1.5  | 2.73E-05 | down  | -        | -1.0 |
| CN181335 | gb CN181335.1 | SGP169629 Atlantic salmon Intestine cDNA library Salmo salar cDNA clone TH5-0120 5', mRNA sequence.                                                                                                | EST_others | -        | -3.2 | 7.85E-02 | 5.2   | -        | 1.2   | -        | -1.2 |
| DW471606 | gb DW471606.1 | SGP285723 Atlantic salmon Spleen cDNA library Salmo salar cDNA clone MI5-1529 5', mRNA sequence.                                                                                                   | EST_others | -        | -3.4 | -        | -16.5 | 5.30E-03 | -16.4 | -        | down |
| DW469525 | gb DW469525.1 | SGP297862 Atlantic salmon Testis cDNA library Salmo salar cDNA clone MG4-2653 5', mRNA sequence.                                                                                                   | EST_others | -        | -4.8 | -        | down  | 7.05E-02 | -17.0 | -        | down |
| DW472356 | gb DW472356.1 | SGP299923 Atlantic salmon Spleen cDNA library Salmo salar cDNA clone MI5-2368 5', mRNA sequence.                                                                                                   | EST_others | 5.86E-02 | down | -        | 0.0   | -        | 0.0   | -        | 0.0  |
| DW473174 | gb DW473174.1 | SGP314039 Atlantic salmon Spleen cDNA library Salmo salar cDNA clone MI5-3285 5', mRNA sequence.                                                                                                   | EST_others | -        | up   | 7.64E-03 | down  | -        | -6.3  | -        | 0.0  |
| DW473451 | gb DW473451.1 | SGP314316 Atlantic salmon Spleen cDNA library Salmo salar cDNA clone MI5-3605 5', mRNA sequence.                                                                                                   | EST_others | -        | 0.00 | -        | 1.0   | 2.27E-04 | down  | -        | 0.0  |
| GT129117 | gb GT129117.1 | ssal_ear_SSH_seismicR_F12p3 Salmo salar ear reverse SSH library designed to be enriched for transcripts down-regulated by seismic sound. Salmo salar cDNA similar to unclassified., mRNA sequence. | EST_others | -        | down | -        | 0.0   | -        | -2.1  | 1.00E-02 | up   |
| CB501817 | gb CB501817.1 | ssalga508249 head Salmo salar cDNA, mRNA sequence.                                                                                                                                                 | EST_others | 4.69E-02 | down | -        | 0.0   | -        | 0.0   | -        | 0.0  |
| CA037858 | gb CA037858.1 | ssalna007071 liver Salmo salar cDNA, mRNA sequence.                                                                                                                                                | EST_others | -        | 0.00 | -        | 0.0   | -        | down  | 8.31E-04 | down |
| CK990829 | gb CK990829.1 | ssalna008094 liver Salmo salar cDNA, mRNA sequence.                                                                                                                                                | EST_others | -        | 0.00 | -        | 0.0   | -        | 0.0   | 7.68E-02 | down |
| CK991140 | gb CK991140.1 | ssalna014053 liver Salmo salar cDNA, mRNA sequence.                                                                                                                                                | EST_others | -        | 0.00 | -        | 0.0   | -        | 0.0   | 3.69E-05 | down |
| CA039316 | gb CA039316.1 | ssalnwh003073 whole Salmo salar cDNA, mRNA sequence.                                                                                                                                               | EST_others | -        | 0.00 | 2.04E-04 | -65.3 | -        | 0.0   | -        | 0.0  |
| CA038580 | gb CA038580.1 | ssalnwh008031 whole Salmo salar cDNA, mRNA sequence.                                                                                                                                               | EST_others | 1.61E-02 | down | -        | -1.1  | -        | 0.0   | -        | -3.6 |
| CB511060 | gb CB511060.1 | ssalnwh507328 whole Salmo salar cDNA, mRNA sequence.                                                                                                                                               | EST_others | -        | 0.00 | -        | down  | 6.99E-02 | down  | -        | up   |
| CA042597 | gb CA042597.1 | ssalplnb501369 gut Salmo salar cDNA, mRNA sequence.                                                                                                                                                | EST_others | -        | 3.2  | -        | 1.9   | 3.65E-02 | 7.3   | -        | up   |
| CA768031 | gb CA768031.1 | ssalplnb510330 gut Salmo salar cDNA, mRNA sequence.                                                                                                                                                | EST_others | 7.32E-02 | down | -        | down  | 3.59E-04 | down  | -        | 0.0  |
| CA042008 | gb CA042008.1 | ssalplnb512301 gut Salmo salar cDNA, mRNA sequence.                                                                                                                                                | EST_others | -        | -1.6 | 5.49E-02 | 5.4   | -        | 2.8   | -        | 1.6  |
| CA054965 | gb CA054965.1 | ssalrga510050 mixed_tissue Salmo salar cDNA,                                                                                                                                                       | EST_others | -        | -1.7 | -        | 1.3   | 7.56E-02 | 6.4   | -        | 5.4  |

|              |               |                                                                   |            |   |      |          |      |          |       |          |       |  |
|--------------|---------------|-------------------------------------------------------------------|------------|---|------|----------|------|----------|-------|----------|-------|--|
|              |               | mRNA sequence.                                                    |            |   |      |          |      |          |       |          |       |  |
| CA056117     | gb CA056117.1 | ssalrgb504092 mixed_tissue Salmo salar cDNA, mRNA sequence.       | EST_others | - | down | -        | down | 3.90E-03 | down  | -        | down  |  |
| CA057792     | gb CA057792.1 | ssalrgb507133 mixed_tissue Salmo salar cDNA, mRNA sequence.       | EST_others | - | down | -        | -5.1 | 1.62E-03 | -15.2 | -        | down  |  |
| CA054786     | gb CA054786.1 | ssalrgb511065 mixed_tissue Salmo salar cDNA, mRNA sequence.       | EST_others | - | down | -        | down | 5.65E-02 | down  | -        | down  |  |
| CX353553     | gb CX353553.1 | ssalrgb515206_rev_0 mixed_tissue Salmo salar cDNA, mRNA sequence. | EST_others | - | down | -        | down | 1.42E-03 | down  | -        | down  |  |
| CA054240     | gb CA054240.1 | ssalrgb517113 mixed_tissue Salmo salar cDNA, mRNA sequence.       | EST_others | - | down | -        | down | 1.96E-03 | down  | -        | 0.0   |  |
| CX357249     | gb CX357249.1 | ssalrgb526112_rev_0 mixed_tissue Salmo salar cDNA, mRNA sequence. | EST_others | - | up   | -        | -4.0 | 1.96E-02 | down  | 5.60E-04 | down  |  |
| CA058601     | gb CA058601.1 | ssalrgb544140 mixed_tissue Salmo salar cDNA, mRNA sequence.       | EST_others | - | -6.8 | 5.76E-04 | 25.9 | -        | -2.5  | -        | down  |  |
| CB517802     | gb CB517802.1 | ssalrgb549316 mixed_tissue Salmo salar cDNA, mRNA sequence.       | EST_others | - | 3.4  | -        | down | 1.59E-02 | down  | -        | -2.2  |  |
| CB516646     | gb CB516646.1 | ssalrgb555042 mixed_tissue Salmo salar cDNA, mRNA sequence.       | EST_others | - | down | -        | down | 1.59E-02 | down  | -        | 0.0   |  |
| CA049024     | gb CA049024.1 | ssalsrkc010094 kidney Salmo salar cDNA, mRNA sequence.            | EST_others | - | 0.00 | -        | down | 2.43E-02 | down  | -        | up    |  |
| CB499373     | gb CB499373.1 | ssalsrkc016061 kidney Salmo salar cDNA, mRNA sequence.            | EST_others | - | down | -        | down | 2.51E-04 | down  | -        | down  |  |
| Locus_34577  | -             | -                                                                 | -          | - | 2.1  | -        | -1.2 | -        | up    | 9.83E-03 | 14.2  |  |
| Locus_32303  | -             | -                                                                 | -          | - | 0.00 | -        | 0.0  | -        | 0.0   | 1.15E-02 | -34.3 |  |
| Locus_99680  | -             | -                                                                 | -          | - | 0.00 | -        | down | -        | 0.0   | 1.15E-02 | -35.6 |  |
| Locus_9039   | -             | -                                                                 | -          | - | -4.3 | -        | -1.6 | -        | 1.1   | 9.95E-02 | down  |  |
| Locus_112355 | -             | -                                                                 | -          | - | 0.00 | -        | 0.0  | -        | 0.0   | 1.19E-02 | down  |  |
| Locus_44033  | -             | -                                                                 | -          | - | 0.00 | -        | -5.9 | -        | up    | 5.91E-02 | up    |  |
| Locus_99603  | -             | -                                                                 | -          | - | 0.00 | -        | 0.0  | -        | 0.0   | 3.22E-03 | up    |  |
| Locus_22516  | -             | -                                                                 | -          | - | up   | -        | 1.2  | -        | 1.4   | 3.74E-02 | up    |  |
| Locus_99354  | -             | -                                                                 | -          | - | down | -        | up   | -        | up    | 4.73E-22 | up    |  |
| Locus_36047  | -             | -                                                                 | -          | - | 1.0  | -        | 1.0  | 1.28E-02 | down  | -        | down  |  |
| Locus_215    | -             | -                                                                 | -          | - | 2.4  | 5.78E-02 | -7.5 | -        | -1.3  | -        | -2.1  |  |
| Locus_109383 | -             | -                                                                 | -          | - | -2.5 | -        | 3.9  | 3.41E-02 | -11.7 | -        | -1.2  |  |
| Locus_17197  | -             | -                                                                 | -          | - | 1.7  | 2.87E-03 | down | -        | -1.1  | -        | -1.1  |  |
| Locus_91597  | -             | -                                                                 | -          | - | -1.2 | 6.48E-02 | 5.8  | -        | -1.4  | -        | 1.1   |  |
| Locus_16875  | -             | -                                                                 | -          | - | 1.2  | 9.01E-02 | -9.5 | -        | 1.3   | -        | 1.9   |  |

|              |   |   |   |          |       |          |      |          |      |   |     |
|--------------|---|---|---|----------|-------|----------|------|----------|------|---|-----|
| Locus_21416  | - | - | - | -        | down  | -        | 0.0  | 2.43E-02 | down | - | 0.0 |
| Locus_110699 | - | - | - | -        | 0.00  | -        | 0.0  | 4.49E-02 | down | - | 0.0 |
| Locus_21692  | - | - | - | -        | 0.00  | -        | 0.0  | 4.49E-02 | down | - | 0.0 |
| Locus_93618  | - | - | - | -        | 0.00  | -        | 0.0  | 1.04E-02 | up   | - | 0.0 |
| Locus_42929  | - | - | - | 1.47E-09 | 358.1 | -        | 0.0  | -        | 0.0  | - | 0.0 |
| Locus_63842  | - | - | - | 3.78E-06 | down  | -        | 0.0  | -        | 0.0  | - | 0.0 |
| Locus_42919  | - | - | - | 9.35E-14 | up    | -        | 0.0  | -        | 0.0  | - | 0.0 |
| Locus_43483  | - | - | - | 3.91E-08 | up    | -        | 0.0  | -        | 0.0  | - | 0.0 |
| Locus_43115  | - | - | - | 1.45E-07 | up    | -        | 0.0  | -        | 0.0  | - | 0.0 |
| Locus_45068  | - | - | - | 2.87E-07 | up    | -        | 0.0  | -        | 0.0  | - | 0.0 |
| Locus_43319  | - | - | - | 8.82E-07 | up    | -        | 0.0  | -        | 0.0  | - | 0.0 |
| Locus_47644  | - | - | - | 2.14E-06 | up    | -        | 0.0  | -        | 0.0  | - | 0.0 |
| Locus_45727  | - | - | - | 5.37E-06 | up    | -        | 0.0  | -        | 0.0  | - | 0.0 |
| Locus_43795  | - | - | - | 8.08E-06 | up    | -        | 0.0  | -        | 0.0  | - | 0.0 |
| Locus_80358  | - | - | - | 1.21E-04 | up    | -        | 0.0  | -        | 0.0  | - | 0.0 |
| Locus_46093  | - | - | - | 7.42E-04 | up    | -        | 0.0  | -        | 0.0  | - | 0.0 |
| Locus_80642  | - | - | - | 1.15E-02 | up    | -        | 0.0  | -        | 0.0  | - | 0.0 |
| Locus_81054  | - | - | - | 1.61E-02 | up    | -        | 0.0  | -        | 0.0  | - | 0.0 |
| Locus_80712  | - | - | - | 7.32E-02 | up    | -        | 0.0  | -        | 0.0  | - | 0.0 |
| Locus_56467  | - | - | - | -        | 2.8   | -        | 1.0  | 6.04E-02 | 19.6 | - | 0.0 |
| Locus_52222  | - | - | - | -        | 4.7   | 2.56E-02 | 10.2 | -        | up   | - | 0.0 |
| Locus_90954  | - | - | - | -        | 0.00  | 9.17E-02 | 21.3 | -        | 0.0  | - | 0.0 |
| Locus_21308  | - | - | - | 3.14E-17 | up    | -        | down | -        | 0.0  | - | 0.0 |
| Locus_52406  | - | - | - | -        | 0.00  | 1.03E-05 | up   | -        | 0.0  | - | 0.0 |
| Locus_43970  | - | - | - | 1.76E-07 | up    | -        | 0.0  | -        | 0.0  | - | up  |
| Locus_21331  | - | - | - | 2.80E-15 | up    | -        | 0.0  | -        | 0.0  | - | up  |
